# Supplementary material for: Mistimed sleep and waking activity in humans disrupts glucocorticoid signalling transcripts and SP1, but not plasma cortisol rhythms
Source: Front Physiol. 2022 Aug 17;13:946444. doi: 10.3389/fphys.2022.946444 (PMC9428761; doi:10.3389/fphys.2022.946444)
Supplement: Supplementary file 1 [file Table2.XLSX]

## Sheet: ArcherSupplementalDataFile2_rev
Probe_ID	Gene_Symbols	Sleep_condition_BHp	Sleep_condition_x_cortisolbin_interaction_BHp	Sleep_out.of.phase_up.down_regulation	Significant_MainEffect	Significant_Interaction	SP1_site
A_23_P217015	SET	7.95e-11	0.318313	Down	1	0	1
A_24_P529644	H6PD	2.7e-07	0.101407	Down	1	0	1
A_24_P936688	SNRK	1.1e-06	0.000258333	Down	1	1	1
A_23_P213045	LEF1	3.39e-06	0.530298	Down	1	0	1
A_32_P26738	KIAA1143	1.71e-05	0.00302581	Down	1	1	1
A_23_P2366	NUDT4	1.71e-05	0.0561441	Up	1	0	1
A_23_P105138	CAT	0.000306315	0.677551	Down	1	0	1
A_23_P340123	TRIM29	0.0018548	0.58699	Up	1	0	1
A_23_P131646	RPIA	0.00311213	0.000269307	Up	1	1	1
A_24_P426	OSBPL11	0.00511294	0.116395	Down	1	0	1
A_24_P944437	ARID5B	0.00618117	0.291091	Down	1	0	1
A_23_P31896	ST3GAL1	0.011883	0.0344193	Down	1	1	1
A_23_P82181	QRSL1	0.012175	0.000194445	Down	1	1	1
A_23_P35412	IFIT3	0.012175	0.100519	Down	1	0	1
A_24_P11307	AHCYL1	0.012175	0.173725	Down	1	0	1
A_24_P29401	PIK3R1	0.012175	0.284699	Down	1	0	1
A_24_P114604	TBL1XR1	0.0131522	0.894827	Down	1	0	1
A_23_P214444	TAP2	0.0154149	0.0419233	Down	1	1	0
A_23_P377197	MRAS	0.0167359	0.490922	Down	1	0	0
A_24_P226355	RANBP9	0.0185373	0.514229	Down	1	0	1
A_32_P52282	HSD17B7	0.0193909	0.056789	Down	1	0	1
A_23_P85693	GBP2	0.0193909	0.0933189	Down	1	0	1
A_23_P169619	AFF1	0.0205391	0.00706032	Down	1	1	1
A_23_P211179	UBE2G2	0.0262752	0.112466	Down	1	0	1
A_23_P257087	PDK4	0.027691	4.89e-08	Down	1	1	1
A_23_P143885	ARHGEF3	0.0295581	0.000258333	Down	1	1	0
A_23_P45361	GLUD2	0.0295581	0.0821694	Down	1	0	1
A_24_P63109	PPP1R2	0.0295581	0.304562	Down	1	0	1
A_24_P73264	DUSP16	0.0311415	0.0772941	Down	1	0	1
A_23_P96451	CA5B	0.0311415	0.424041	Down	1	0	1
A_23_P79289	COBLL1	0.0311415	0.728324	Down	1	0	1
A_23_P372923	FGFR1	0.031308	0.185262	Down	1	0	1
A_23_P32454	TG	0.0330001	0.504527	Up	1	0	0
A_23_P214121	AMD1	0.033805	0.00408848	Down	1	1	1
A_23_P162466	PKP2	0.0347165	0.431672	Down	1	0	0
A_23_P11859	HSD17B7	0.0350673	0.133322	Down	1	0	1
A_24_P237278	NIPSNAP1	0.0350673	0.430807	Down	1	0	1
A_23_P31893	ST3GAL1	0.0356956	0.091609	Down	1	0	1
A_23_P385673	RASA3	0.0383984	0.579149	Down	1	0	1
A_32_P39394	GLIS3	0.0387468	0.225105	Up	1	0	1
A_24_P97465	CISH	0.0387468	0.296611	Down	1	0	1
A_23_P128541	TRAFD1	0.0387468	0.540125	Down	1	0	1
A_23_P209195	C19orf12	0.0414792	0.00143778	Up	1	1	0
A_32_P163858	SCD	0.0425676	0.00205515	Down	1	1	1
A_23_P257278	CDK5RAP1	0.0425676	0.0095924	Down	1	1	1
A_23_P105442	GRASP	0.0425676	0.0532257	Up	1	0	1
A_23_P411162	PER2	0.0425676	0.882137	Down	1	0	1
A_23_P82588	C7orf55	0.0447484	0.0821694	Up	1	0	0
A_23_P380240	CEACAM8	0.0489945	0.111276	Up	1	0	0
A_23_P413150	KLF13	0.0489945	0.335956	Down	1	0	1
A_23_P15123	UBFD1	0.0500151	0.186663	Up	0	0	1
A_32_P171942	C9orf131	0.0504045	0.611796	Up	0	0	0
A_24_P353300	LIMK2	0.051479	0.000112019	Down	0	1	1
A_23_P109034	SDC4	0.0522861	0.00808473	Up	0	1	1
A_23_P397391	FFAR2	0.0522861	0.0119896	Down	0	1	0
A_23_P214354	EXOC2	0.0522861	0.0370845	Down	0	1	1
A_23_P26124	RORA	0.0551185	0.252292	Down	0	0	0
A_23_P3946	NT5M	0.0551185	0.4346	Up	0	0	0
A_23_P106773	SULT1A2	0.0575639	0.0430473	Up	0	1	1
A_24_P265832	SUCNR1	0.0582266	0.334222	Down	0	0	0
A_23_P112078	MFHAS1	0.0582266	0.493597	Down	0	0	0
A_24_P367561	SLC35B4	0.0602294	0.690953	Down	0	0	1
A_24_P256390	RIN3	0.0689692	0.0116088	Down	0	1	1
A_24_P336759	MCL1	0.080035	0.00808473	Down	0	1	1
A_23_P110204	CXCL5	0.080035	0.208978	Down	0	0	1
A_24_P88031	C8orf33	0.080035	0.493597	Down	0	0	0
A_24_P212096	NAV1	0.080035	0.739322	Down	0	0	0
A_23_P38106	SPHK1	0.0825115	0.562488	Up	0	0	0
A_23_P138665	GLUD1	0.0837996	0.0144225	Down	0	1	1
A_24_P286845	REEP3	0.0943175	0.440102	Down	0	0	1
A_23_P217866	IFI16	0.0965477	0.518106	Down	0	0	1
A_23_P213369	KIAA0141	0.0991231	0.562632	Up	0	0	1
A_24_P289376	C2orf68	0.0991231	0.75344	Up	0	0	0
A_32_P149298	KIAA1841	0.107249	0.434323	Down	0	0	1
A_24_P924040	SSFA2	0.109688	0.217678	Down	0	0	1
A_23_P7361	ELOVL6	0.109752	0.0795768	Down	0	0	1
A_24_P223604	KIAA1429	0.109752	0.362202	Down	0	0	1
A_32_P52609	LPIN1	0.112181	0.000141257	Down	0	1	1
A_23_P81369	ADAM19	0.112181	0.020706	Down	0	1	1
A_24_P923251	TGM2	0.112181	0.116902	Up	0	0	1
A_23_P59877	FABP5	0.112181	0.217678	Up	0	0	1
A_32_P41461	WASF2	0.112181	0.229371	Down	0	0	1
A_24_P185347	MBD1	0.115721	0.311182	Down	0	0	1
A_24_P163477	QRSL1	0.117387	6.65e-05	Down	0	1	1
A_24_P313180	C14orf1	0.119538	0.391356	Down	0	0	0
A_24_P22079	FOXO1	0.12141	0.0185674	Down	0	1	1
A_24_P44279	FBXW8	0.12141	0.549016	Down	0	0	1
A_23_P75811	SLC3A2	0.131024	0.0304761	Down	0	1	1
A_23_P361336	ADARB1	0.14196	0.141453	Down	0	0	1
A_23_P215980	KIAA1429	0.14196	0.4346	Down	0	0	1
A_23_P383053	APPBP2	0.14196	0.700057	Down	0	0	1
A_23_P73660	TRAPPC2	0.142574	0.124263	Up	0	0	1
A_23_P211926	WNT5A	0.143224	0.409276	Up	0	0	0
A_23_P211985	SNRK	0.150858	0.420682	Down	0	0	1
A_23_P42375	RAB32	0.154221	0.685982	Up	0	0	0
A_24_P144082	C9orf131	0.157229	0.022188	Down	0	1	0
A_23_P253345	C8orf4	0.157229	0.0829017	Up	0	0	0
A_24_P136866	SLC8A1	0.160137	0.000385401	Down	0	1	0
A_23_P78037	CCL7	0.160137	0.679865	Up	0	0	0
A_24_P414553	ARRDC3	0.166376	0.0227407	Down	0	1	1
A_24_P191588	ALAS1	0.166376	0.391356	Down	0	0	1
A_24_P917866	SET	0.166376	0.554879	Up	0	0	1
A_23_P75033	REEP3	0.166376	0.745102	Down	0	0	1
A_23_P316239	CXorf40B	0.167824	5.41e-05	Up	0	1	0
A_23_P46470	ERRFI1	0.171166	0.451527	Down	0	0	1
A_24_P327815	STIP1	0.175544	0.411733	Down	0	0	1
A_24_P303480	RAB32	0.175544	0.4346	Up	0	0	0
A_24_P25354	TACC1	0.17733	0.000636186	Down	0	1	0
A_23_P208090	MBD1	0.184162	0.587195	Up	0	0	1
A_24_P226198	RAD50	0.184397	0.335956	Down	0	0	1
A_32_P3476	RPRML	0.184397	0.477468	Down	0	0	0
A_24_P379413	IL6R	0.185086	3.75e-08	Down	0	1	1
A_24_P136807	RFC1	0.187489	0.622116	Down	0	0	1
A_24_P911787	SLC29A3	0.190688	0.256775	Down	0	0	1
A_32_P18440	ARID5B	0.193086	0.196513	Down	0	0	1
A_23_P408285	PRICKLE1	0.193086	0.206097	Down	0	0	1
A_24_P166527	TNFAIP3	0.193086	0.359363	Down	0	0	1
A_23_P208389	AXL	0.193086	0.652587	Up	0	0	1
A_24_P63563	KIAA0141	0.19359	0.457119	Up	0	0	1
A_32_P163089	C12orf75	0.193981	0.887126	Up	0	0	0
A_23_P60047	TACC1	0.194859	0.00446594	Down	0	1	0
A_23_P25935	C14orf1	0.198096	1.14e-06	Down	0	1	0
A_23_P15174	MT1F	0.198096	0.013075	Up	0	1	1
A_24_P7642	FABP5	0.198096	0.802264	Up	0	0	1
A_24_P243749	PDK4	0.204748	8.7e-08	Down	0	1	1
A_32_P92783	STIP1	0.204748	0.262066	Down	0	0	1
A_23_P83098	ALDH1A1	0.20486	0.0761835	Down	0	0	1
A_23_P91379	RIN2	0.20486	0.785724	Down	0	0	1
A_23_P314835	C20orf85	0.206152	0.128139	Up	0	0	0
A_32_P114746	C1orf111	0.20645	0.133322	Up	0	0	0
A_24_P858698	NFIX	0.210176	0.440102	Up	0	0	0
A_24_P76546	WASF2	0.210856	0.192495	Down	0	0	1
A_23_P110531	FST	0.217954	0.72693	Up	0	0	1
A_23_P59470	ZNF467	0.224252	0.000749643	Up	0	1	1
A_23_P254079	STBD1	0.224252	0.526451	Down	0	0	1
A_23_P65555	SAV1	0.225092	0.13802	Down	0	0	1
A_32_P75094	AIFM2	0.229889	0.14921	Up	0	0	1
A_23_P259632	TMEM120A	0.232892	0.0121218	Up	0	1	1
A_23_P111672	TES	0.232892	0.0716148	Down	0	0	1
A_23_P41227	ALCAM	0.232892	0.942186	Down	0	0	1
A_24_P336276	SLCO3A1	0.235705	0.0201177	Down	0	1	1
A_24_P367454	ZEB2	0.236251	0.116395	Down	0	0	0
A_23_P151426	FOXO1	0.237513	0.0116088	Down	0	1	1
A_23_P213798	SYNPO	0.237513	0.813069	Up	0	0	0
A_23_P35414	PPP1R3C	0.239686	0.711649	Down	0	0	1
A_24_P339974	AP2A2	0.239686	0.901037	Down	0	0	1
A_24_P208345	SLC45A3	0.240024	0.637126	Up	0	0	0
A_23_P33119	C8orf33	0.240562	0.0830767	Down	0	0	0
A_24_P55437	TES	0.240562	0.28866	Down	0	0	1
A_24_P336957	HTRA2	0.240642	0.765248	Up	0	0	1
A_23_P55123	COX10	0.240972	0.190281	Down	0	0	1
A_23_P308924	AK093617	0.24215	0.211897	Down	0	0	0
A_24_P414332	AFF1	0.24215	0.220998	Down	0	0	1
A_24_P938352	CPM	0.243911	0.352612	Down	0	0	0
A_23_P211957	TGFBR2	0.244222	0.417901	Down	0	0	1
A_24_P377394	TRIM26	0.244891	0.0227407	Up	0	1	0
A_23_P214587	TRIM26	0.252037	0.00413121	Down	0	1	0
A_24_P37319	ACSL3	0.252037	0.2554	Down	0	0	1
A_23_P141699	PARD6G	0.253366	0.477833	Up	0	0	0
A_23_P56347	PSG3	0.253711	0.93051	Up	0	0	1
A_32_P414791	POLN	0.257786	0.469249	Down	0	0	0
A_23_P151820	RIN3	0.260676	0.0164576	Down	0	1	1
A_23_P142325	FZR1	0.260676	0.0315927	Up	0	1	1
A_23_P313938	PPIF	0.260676	0.0772941	Down	0	0	1
A_32_P179676	TOB2	0.260676	0.212666	Down	0	0	1
A_23_P217688	TSC22D3	0.263609	0.0359369	Down	0	1	0
A_23_P254917	LGALS4	0.277434	0.0772941	Up	0	0	0
A_24_P346339	SESN1	0.281395	0.00121803	Down	0	1	1
A_24_P388502	MTMR14	0.281395	0.75885	Down	0	0	1
A_23_P18465	RFC1	0.286096	0.00433518	Down	0	1	1
A_23_P362183	ANKS6	0.288335	0.151798	Up	0	0	0
A_24_P637982	C1orf122	0.289898	0.457119	Up	0	0	0
A_23_P216094	ASPH	0.291063	0.0376248	Down	0	1	1
A_24_P357037	UBE2G2	0.291063	0.315177	Up	0	0	1
A_23_P152235	IRX3	0.292331	0.0639613	Down	0	0	1
A_24_P385336	HIPK1	0.292331	0.535661	Down	0	0	1
A_23_P170352	MRPL12	0.293369	0.0705723	Up	0	0	1
A_23_P75002	MKX	0.295789	0.533741	Up	0	0	0
A_23_P204879	CAB39L	0.301232	0.0834245	Down	0	0	1
A_24_P170667	ARID5B	0.301817	0.0358135	Down	0	1	1
A_32_P44775	C9orf85	0.301817	0.289116	Up	0	0	0
A_23_P114862	ANGPTL7	0.306601	0.391356	Down	0	0	0
A_23_P201179	PHTF1	0.306601	0.745102	Up	0	0	1
A_23_P117104	AQP5	0.313803	0.217678	Up	0	0	1
A_23_P434118	CEACAM1	0.322292	0.000187797	Down	0	1	1
A_24_P718973	C1orf122	0.323594	0.146838	Up	0	0	0
A_23_P369948	FOXRED2	0.32614	0.55382	Down	0	0	1
A_23_P395033	DTX2	0.330743	0.00808473	Down	0	1	1
A_24_P304154	AMPD3	0.331367	0.0324063	Up	0	1	0
A_24_P232158	SCARA3	0.331367	0.318313	Up	0	0	1
A_23_P200404	AK2	0.332265	0.447359	Up	0	0	1
A_23_P327519	STARD4	0.335667	0.0716148	Down	0	0	1
A_23_P152262	DPEP1	0.338095	0.71119	Down	0	0	0
A_23_P120572	RIN2	0.340024	0.872724	Down	0	0	1
A_24_P69095	ENC1	0.340999	0.588567	Down	0	0	1
A_32_P17133	PPP1R2	0.341622	0.0502612	Down	0	0	1
A_24_P898583	TRIM26	0.34295	0.0131011	Down	0	1	0
A_24_P56363	CAB39L	0.34295	0.0830767	Down	0	0	1
A_23_P165295	NFIX	0.34295	0.685123	Down	0	0	0
A_23_P346969	PIK3CB	0.347615	0.369402	Down	0	0	0
A_23_P200096	SPSB1	0.35057	0.0500424	Down	0	0	1
A_24_P125067	EEF2K	0.35057	0.109919	Down	0	0	1
A_32_P15421	RNF185	0.35057	0.342361	Down	0	0	1
A_24_P390315	KIAA0391	0.354196	0.875466	Down	0	0	1
A_23_P138435	ZMIZ1	0.355961	0.00333716	Down	0	1	1
A_24_P934546	SFRP2	0.356364	0.2248	Up	0	0	1
A_23_P342275	ADAMTS1	0.360383	0.352612	Down	0	0	1
A_24_P209765	DCTN3	0.360383	0.47506	Up	0	0	1
A_24_P107918	CBFB	0.360383	0.651366	Down	0	0	1
A_23_P377115	MCC	0.360383	0.859099	Down	0	0	1
A_23_P213424	ENC1	0.362947	5.41e-05	Down	0	1	1
A_23_P89589	PER1	0.362947	0.0266573	Down	0	1	1
A_24_P289178	C16orf74	0.362947	0.211848	Up	0	0	0
A_23_P168882	TP53INP1	0.362947	0.230691	Up	0	0	1
A_24_P920823	SSFA2	0.362947	0.236151	Down	0	0	1
A_24_P940815	SGPL1	0.362947	0.254771	Down	0	0	1
A_24_P50753	NUDT4	0.362947	0.489591	Up	0	0	1
A_23_P317756	ACSM3	0.364793	0.00182573	Down	0	1	1
A_23_P153964	INHBB	0.365169	0.000187797	Up	0	1	0
A_32_P141768	AGPAT4	0.366346	0.933864	Up	0	0	1
A_23_P67589	C19orf60	0.367995	0.0723145	Up	0	0	0
A_23_P89187	LASP1	0.36995	0.0144225	Down	0	1	1
A_24_P405992	SYNPO	0.36995	0.335956	Up	0	0	0
A_23_P139704	DUSP6	0.36995	0.362202	Down	0	0	1
A_23_P14863	CHAC1	0.373019	0.350868	Up	0	0	1
A_24_P673063	FABP5	0.373914	0.116902	Up	0	0	1
A_23_P250404	RAD50	0.374525	0.00270759	Down	0	1	1
A_24_P137501	SFRP2	0.374525	0.259422	Up	0	0	1
A_23_P212089	NFKBIZ	0.374525	0.530298	Up	0	0	1
A_23_P250948	BRPF1	0.37716	0.285832	Down	0	0	1
A_23_P141394	WIPI1	0.384479	0.335956	Up	0	0	1
A_23_P144980	PIK3R1	0.384479	0.730511	Down	0	0	1
A_24_P13682	TLE3	0.387374	2.23e-05	Down	0	1	1
A_23_P23221	GADD45A	0.390482	0.00162295	Up	0	1	1
A_32_P154830	OSTM1	0.390482	0.00200755	Up	0	1	1
A_24_P113341	C19orf12	0.390482	0.0491334	Up	0	1	0
A_23_P152125	MVD	0.390482	0.116902	Up	0	0	1
A_23_P79130	PLEKHF1	0.390482	0.317674	Up	0	0	1
A_23_P3131	NEK9	0.402091	0.820077	Down	0	0	1
A_24_P327181	WNK4	0.409344	0.0332067	Down	0	1	1
A_23_P109812	SYN2	0.409344	0.950149	Up	0	0	0
A_23_P130926	C19orf24	0.409512	0.783557	Up	0	0	0
A_23_P149852	LZTS2	0.410552	0.055454	Down	0	0	1
A_23_P255104	LHFPL2	0.410552	0.0736951	Down	0	0	1
A_24_P132276	QRSL1	0.410552	0.270096	Down	0	0	1
A_23_P61623	SLCO3A1	0.413989	0.128139	Up	0	0	1
A_24_P82032	RHOJ	0.413989	0.29274	Down	0	0	0
A_24_P89457	CDKN1A	0.413989	0.875164	Down	0	0	1
A_23_P140807	PSMB10	0.41891	0.0299621	Down	0	1	1
A_24_P381029	GLRX3	0.419245	0.00998118	Up	0	1	1
A_32_P104000	DCUN1D3	0.419719	0.0651452	Up	0	0	1
A_23_P37892	GPT2	0.420248	0.656319	Up	0	0	1
A_24_P942161	NRAP	0.420248	0.739322	Up	0	0	0
A_24_P57700	ZHX3	0.420248	0.790081	Up	0	0	0
A_24_P335620	SLC7A5	0.420248	0.851071	Up	0	0	1
A_24_P392110	PSG8	0.422572	0.192255	Up	0	0	1
A_24_P74070	PARD6G	0.424234	0.845134	Up	0	0	0
A_23_P46429	CYR61	0.424881	0.561955	Down	0	0	1
A_32_P154121	SETDB2	0.426074	0.00270759	Up	0	1	1
A_23_P212554	TBL1XR1	0.429858	0.810482	Down	0	0	1
A_23_P72961	PRPS1	0.431256	0.777588	Down	0	0	1
A_23_P344555	NEDD9	0.433304	0.000181026	Down	0	1	1
A_23_P111206	FKBP5	0.433304	0.00706032	Down	0	1	1
A_23_P83931	NET1	0.433304	0.0219956	Up	0	1	1
A_24_P371399	C3orf58	0.433304	0.101832	Down	0	0	0
A_23_P381172	MRAP	0.433304	0.784805	Up	0	0	0
A_23_P20494	NDRG1	0.434655	0.00121803	Up	0	1	1
A_23_P341537	SETDB2	0.434655	0.00323612	Down	0	1	1
A_23_P122375	ZFAND3	0.434655	0.0313021	Down	0	1	1
A_24_P18105	ASPH	0.434655	0.0494355	Up	0	1	1
A_24_P349092	LHFPL2	0.434655	0.0502612	Down	0	0	1
A_24_P399980	HEPH	0.434655	0.055454	Up	0	0	1
A_24_P38387	NDRG1	0.434655	0.120661	Down	0	0	1
A_23_P156327	TGFBI	0.434655	0.127789	Down	0	0	1
A_23_P5601	DOK1	0.434655	0.186094	Up	0	0	1
A_24_P148373	CR624826	0.434655	0.213201	Down	0	0	0
A_32_P521927	MOCS1	0.434655	0.411464	Up	0	0	1
A_23_P151637	RNASE2	0.434655	0.52444	Up	0	0	1
A_23_P114814	RHOU	0.434655	0.753684	Down	0	0	1
A_23_P14892	IGFALS	0.434655	0.915061	Up	0	0	1
A_24_P626920	SCD	0.442066	0.198679	Up	0	0	1
A_23_P58993	MOCS1	0.442189	0.0736951	Up	0	0	1
A_24_P95029	TAX1BP1	0.443365	0.000793425	Down	0	1	1
A_23_P104804	ZBTB16	0.443365	0.0262455	Down	0	1	0
A_23_P383385	POLE4	0.443365	0.133322	Up	0	0	1
A_24_P305570	RIN2	0.443365	0.523913	Down	0	0	1
A_24_P148261	TGFB2	0.443365	0.962749	Down	0	0	1
A_23_P48868	RASL12	0.446632	0.128139	Up	0	0	0
A_23_P46871	SLC29A3	0.446853	0.254393	Down	0	0	1
A_24_P312895	ABCB9	0.447745	0.565752	Down	0	0	1
A_23_P132595	VGLL4	0.447745	0.598271	Up	0	0	1
A_24_P83118	DUSP18	0.447797	0.00308137	Up	0	1	1
A_24_P102880	NAV1	0.447797	0.026686	Down	0	1	0
A_23_P130573	CEACAM7	0.447797	0.0299621	Down	0	1	0
A_24_P335263	NUDT4	0.447797	0.131761	Up	0	0	1
A_23_P163200	RIN3	0.457813	0.0772941	Down	0	0	1
A_23_P36226	SLC25A33	0.457813	0.236109	Up	0	0	1
A_32_P219970	PSG5	0.46007	0.270728	Down	0	0	1
A_23_P147605	C11orf49	0.462314	0.0107881	Up	0	1	0
A_23_P388124	ABCD2	0.462314	0.0646179	Down	0	0	1
A_24_P215352	PRKCDBP	0.462314	0.186094	Down	0	0	1
A_24_P79617	KIAA0040	0.462314	0.621603	Down	0	0	1
A_32_P179005	C2orf68	0.462314	0.639904	Up	0	0	0
A_23_P57989	TBL1XR1	0.462314	0.741964	Up	0	0	1
A_24_P114183	FDPS	0.464072	0.00277614	Up	0	1	1
A_23_P57227	SNTA1	0.464072	0.84782	Up	0	0	1
A_23_P421483	CEACAM6	0.464395	0.000245382	Up	0	1	0
A_23_P79251	EHD3	0.464395	0.0145286	Up	0	1	1
A_23_P1286	C10orf82	0.464395	0.0964405	Up	0	0	0
A_23_P57417	MMP11	0.464395	0.71882	Up	0	0	1
A_24_P319635	MCL1	0.466144	0.000137812	Down	0	1	1
A_23_P154234	POLE4	0.466144	0.141132	Up	0	0	1
A_23_P5103	PSG4	0.466144	0.185262	Up	0	0	1
A_32_P1712	RNASE2	0.466144	0.391356	Up	0	0	1
A_24_P626850	H6PD	0.466144	0.785221	Down	0	0	1
A_23_P102454	INSIG2	0.466701	0.00998118	Up	0	1	1
A_24_P62668	AK021425	0.471979	0.986787	Up	0	0	0
A_23_P108170	PSG6	0.472912	0.070331	Down	0	0	1
A_23_P7201	MED28	0.472912	0.147098	Up	0	0	1
A_23_P406785	C9orf50	0.472912	0.275988	Up	0	0	0
A_23_P16976	ANXA4	0.472912	0.460237	Down	0	0	1
A_23_P338534	HIF3A	0.472912	0.841574	Down	0	0	1
A_23_P116007	MAPK8IP1	0.472912	0.875466	Down	0	0	0
A_23_P10701	APBB2	0.493237	0.715259	Down	0	0	1
A_32_P204676	FABP5	0.496036	0.00972591	Up	0	1	1
A_23_P87216	SLC3A2	0.498854	0.433376	Down	0	0	1
A_23_P126844	TNFRSF25	0.502551	0.00808473	Up	0	1	0
A_23_P315131	FGFR1	0.503644	0.00706032	Down	0	1	1
A_32_P197489	KLF13	0.503644	0.041867	Down	0	1	1
A_23_P60933	MT1G	0.503644	0.783557	Down	0	0	0
A_24_P248606	ACSL3	0.503644	0.789896	Down	0	0	1
A_23_P93562	SESN1	0.50499	2.6e-06	Down	0	1	1
A_23_P206498	C16orf13	0.50499	0.236109	Up	0	0	0
A_24_P406934	C11orf1	0.50499	0.294306	Down	0	0	0
A_23_P105592	MVK	0.505711	0.00121803	Up	0	1	1
A_23_P38334	WNK4	0.505711	0.507833	Down	0	0	1
A_23_P59444	SLC35B4	0.508369	0.515605	Down	0	0	1
A_24_P96961	SPSB1	0.508613	0.522431	Up	0	0	1
A_23_P118327	THUMPD1	0.508924	0.408725	Down	0	0	1
A_23_P343671	FOSL2	0.514653	4.02e-07	Up	0	1	1
A_24_P410582	VGLL4	0.514653	0.120661	Up	0	0	1
A_24_P861568	RABGEF1	0.514653	0.186094	Down	0	0	1
A_24_P925389	PPIL6	0.514653	0.285832	Up	0	0	1
A_23_P140394	NFATC4	0.514653	0.393979	Up	0	0	1
A_23_P52219	ERLIN1	0.514653	0.933239	Down	0	0	1
A_24_P929473	OSBPL11	0.515973	0.0279874	Down	0	1	1
A_23_P163025	RNASE3	0.515973	0.526451	Up	0	0	0
A_23_P337262	APCDD1	0.51822	0.00381337	Up	0	1	0
A_23_P342934	TLE3	0.519608	0.000258333	Down	0	1	1
A_23_P29975	C4orf19	0.52114	0.84274	Up	0	0	0
A_24_P376322	MBD1	0.52114	0.862269	Down	0	0	1
A_24_P377775	RGS3	0.521553	0.60414	Down	0	0	0
A_23_P149613	FMO1	0.525555	0.0973648	Up	0	0	0
A_23_P212552	TBL1XR1	0.525555	0.38199	Down	0	0	1
A_23_P215461	LIMK1	0.528378	0.794455	Up	0	0	1
A_23_P160025	IFI16	0.53187	0.567903	Down	0	0	1
A_24_P53976	GLUL	0.534745	0.000194445	Down	0	1	1
A_23_P211207	ADARB1	0.534745	0.00191081	Down	0	1	1
A_23_P57877	ALAS1	0.534745	0.157898	Down	0	0	1
A_24_P372901	MVK	0.534745	0.185262	Up	0	0	1
A_23_P97700	TXNIP	0.534745	0.493417	Down	0	0	1
A_24_P193648	GPT2	0.534745	0.589021	Down	0	0	1
A_23_P320070	CARD14	0.534745	0.789896	Up	0	0	0
A_24_P63799	QRSL1	0.534805	0.882137	Down	0	0	1
A_32_P172141	CDON	0.548508	0.0836592	Up	0	0	1
A_23_P58960	AGPAT4	0.548508	0.956217	Up	0	0	1
A_32_P776863	C2orf61	0.549463	0.0967201	Down	0	0	0
A_23_P40611	TCN2	0.549463	0.31855	Down	0	0	1
A_23_P39088	PRMT1	0.550026	0.000258333	Up	0	1	1
A_23_P206697	CYB5B	0.551313	0.120661	Down	0	0	1
A_24_P916718	ZNF467	0.559058	0.311484	Up	0	0	1
A_23_P59441	SLC35B4	0.559058	0.69474	Down	0	0	1
A_23_P65240	COL4A1	0.559995	0.0240378	Up	0	1	0
A_24_P370946	CYR61	0.559995	0.644023	Up	0	0	1
A_23_P300033	PDGFRA	0.559995	0.780441	Down	0	0	1
A_23_P118246	GINS2	0.559995	0.823081	Up	0	0	1
A_23_P27493	PPAN	0.56058	0.0491051	Up	0	1	1
A_23_P145984	TSPAN12	0.56058	0.236414	Up	0	0	1
A_23_P98402	SIDT2	0.565047	0.0679027	Down	0	0	1
A_23_P348121	FOSL2	0.566545	0.000532979	Up	0	1	1
A_23_P414519	NRN1	0.566545	0.589021	Up	0	0	1
A_24_P133253	KITLG	0.566545	0.883029	Up	0	0	1
A_23_P359091	SMAD3	0.570717	0.000877664	Up	0	1	1
A_23_P148879	ATP1A2	0.580678	0.539774	Up	0	0	0
A_23_P103787	HIPK1	0.593052	0.0304761	Down	0	1	1
A_23_P102060	SSFA2	0.595478	0.00366382	Down	0	1	1
A_23_P144348	SLIT2	0.595478	0.605101	Up	0	0	0
A_23_P151653	APEX1	0.59958	0.00976028	Down	0	1	1
A_24_P83922	SNRPC	0.608042	0.355891	Down	0	0	1
A_23_P345581	FOSL2	0.60872	0.00143581	Down	0	1	1
A_23_P137514	IVNS1ABP	0.612103	0.0519556	Up	0	0	1
A_24_P133288	PKP2	0.612103	0.523913	Up	0	0	0
A_24_P675386	C11orf58	0.612754	0.0454425	Up	0	1	0
A_24_P71938	SMAD1	0.614515	0.352612	Down	0	0	0
A_23_P52298	NPM3	0.614816	0.141132	Up	0	0	1
A_23_P425073	RBMS2	0.614816	0.272427	Up	0	0	1
A_24_P274795	CDCA7L	0.615908	5.41e-05	Up	0	1	1
A_23_P55738	CEACAM1	0.615908	0.000152091	Down	0	1	1
A_23_P206760	HP	0.615908	0.000258333	Up	0	1	1
A_23_P56433	C2orf40	0.615908	0.00233021	Down	0	1	0
A_23_P16032	TRAPPC2P1	0.615908	0.00266417	Up	0	1	1
A_23_P127584	NNMT	0.615908	0.0821694	Up	0	0	1
A_23_P87560	BTG1	0.615908	0.139222	Down	0	0	1
A_24_P357726	PSG8	0.615908	0.210401	Down	0	0	1
A_23_P253350	C8orf4	0.615908	0.234694	Up	0	0	0
A_23_P212870	SMAD1	0.615908	0.235352	Down	0	0	0
A_23_P160154	GALE	0.615908	0.289481	Down	0	0	1
A_23_P11071	PORCN	0.615908	0.560466	Up	0	0	1
A_23_P44244	SMARCA1	0.615908	0.58699	Down	0	0	1
A_24_P409595	MAPK8IP1	0.615908	0.668025	Up	0	0	0
A_23_P368067	TAP2	0.615908	0.690326	Down	0	0	0
A_23_P108200	RAB3A	0.621161	0.00867353	Down	0	1	1
A_24_P358400	ANKS6	0.621161	0.28866	Down	0	0	0
A_23_P207537	DUSP14	0.627056	0.0279874	Up	0	1	1
A_24_P913115	PTEN	0.63219	0.0519556	Down	0	0	1
A_24_P170887	C8orf33	0.632778	0.206823	Up	0	0	0
A_23_P81103	SFRP2	0.634831	0.0988008	Up	0	0	1
A_23_P115261	AGT	0.634831	0.811859	Down	0	0	1
A_23_P94795	TEAD4	0.636957	0.325779	Down	0	0	1
A_23_P121533	SPON2	0.636957	0.686466	Up	0	0	0
A_32_P217471	MYO1B	0.64205	0.255469	Down	0	0	1
A_23_P137984	S100A10	0.642563	0.0772941	Up	0	0	1
A_23_P424513	RANBP9	0.642563	0.505538	Down	0	0	1
A_24_P62833	ADAMTSL4	0.647335	0.368311	Down	0	0	0
A_24_P194068	PLEKHF1	0.648595	0.933239	Down	0	0	1
A_23_P39237	ZFP36	0.652852	0.25607	Down	0	0	1
A_23_P2920	SERPINA3	0.652852	0.950266	Up	0	0	1
A_23_P160729	AP4B1	0.65861	0.0144225	Up	0	1	1
A_23_P47559	C11orf58	0.65861	0.0443447	Down	0	1	0
A_23_P355536	USP54	0.65861	0.120661	Down	0	0	0
A_23_P17575	AHCY	0.65861	0.124263	Up	0	0	1
A_32_P156322	COL6A3	0.65861	0.22006	Down	0	0	0
A_23_P206022	ITGA11	0.65861	0.25858	Up	0	0	0
A_24_P218074	ZNF467	0.65861	0.359363	Up	0	0	1
A_24_P104926	C20orf144	0.65861	0.391356	Up	0	0	0
A_24_P230703	NRAP	0.65861	0.467785	Up	0	0	0
A_24_P234701	APBB2	0.65861	0.513865	Down	0	0	1
A_23_P98335	CDON	0.65861	0.565752	Down	0	0	1
A_23_P122216	LOX	0.65861	0.684303	Up	0	0	0
A_24_P11384	ERRFI1	0.65861	0.790081	Down	0	0	1
A_23_P38649	MC2R	0.65861	0.790081	Down	0	0	0
A_23_P75325	SGPL1	0.65861	0.965282	Down	0	0	1
A_23_P95764	PRPS1	0.662645	2.1e-06	Down	0	1	1
A_23_P75028	REEP3	0.662645	0.00408848	Down	0	1	1
A_32_P80068	CLEC2D	0.662645	0.103807	Down	0	0	1
A_23_P160466	SLC19A2	0.667042	0.013075	Up	0	1	1
A_32_P54018	KIAA1143	0.671596	0.335956	Down	0	0	1
A_23_P28878	C20orf27	0.671596	0.55382	Up	0	0	0
A_23_P10442	OSBPL1A	0.671596	0.589021	Up	0	0	1
A_23_P404902	SHROOM1	0.672508	0.802824	Up	0	0	0
A_23_P57856	BCL6	0.674052	4e-05	Up	0	1	1
A_23_P22526	HEPH	0.676353	0.544095	Up	0	0	1
A_23_P138567	AIFM2	0.677317	0.116395	Up	0	0	1
A_32_P231446	HIPK1	0.677836	0.770068	Up	0	0	1
A_23_P374082	ADAM19	0.679267	3.42e-05	Up	0	1	1
A_23_P150350	C11orf1	0.679267	0.00162971	Down	0	1	0
A_23_P150249	CCDC85B	0.679267	0.019659	Up	0	1	1
A_24_P301501	CCL15	0.679267	0.0331193	Down	0	1	1
A_23_P218442	CEACAM6	0.679267	0.0502612	Down	0	0	0
A_24_P57367	AHCY	0.679267	0.0716985	Up	0	0	1
A_23_P66487	SMARCD2	0.679267	0.0741128	Up	0	0	1
A_23_P422851	CABLES1	0.679267	0.120661	Up	0	0	1
A_24_P128880	TBL1XR1	0.679267	0.129263	Down	0	0	1
A_24_P932418	AP2A2	0.679267	0.229371	Up	0	0	1
A_23_P83012	INSL6	0.679267	0.237863	Down	0	0	0
A_24_P206624	FGFR2	0.679267	0.307459	Down	0	0	1
A_24_P364363	TNFRSF1A	0.679267	0.440102	Down	0	0	1
A_24_P67946	NUDT4	0.679267	0.490009	Down	0	0	1
A_24_P274615	ARRDC3	0.679267	0.618805	Down	0	0	1
A_23_P24044	CNNM2	0.679267	0.629265	Up	0	0	1
A_23_P301304	FGFR1	0.679267	0.655038	Up	0	0	1
A_23_P257704	HSPB1	0.679267	0.75344	Down	0	0	1
A_23_P209320	PER2	0.679267	0.75344	Up	0	0	1
A_24_P99371	THUMPD1	0.679267	0.764503	Down	0	0	1
A_23_P361049	MYO1B	0.679267	0.790081	Up	0	0	1
A_32_P36046	C2orf68	0.679267	0.810945	Up	0	0	0
A_23_P402765	NRAP	0.679267	0.882137	Up	0	0	0
A_23_P31287	BMPER	0.679267	0.938796	Up	0	0	0
A_23_P340382	KIAA1841	0.679267	0.97971	Down	0	0	1
A_24_P303052	PPARGC1A	0.682872	0.0370845	Down	0	1	1
A_23_P434809	S100A8	0.682872	0.128812	Down	0	0	0
A_23_P113634	CBFB	0.682872	0.278583	Up	0	0	1
A_24_P671164	PRLR	0.682872	0.37844	Up	0	0	1
A_23_P8513	SNX10	0.682872	0.696245	Down	0	0	0
A_23_P37988	CPNE2	0.682872	0.918596	Down	0	0	1
A_23_P128215	SOCS2	0.684769	0.00808625	Up	0	1	1
A_24_P944458	INSIG2	0.684978	0.029955	Down	0	1	1
A_23_P372386	SCARA5	0.684978	0.0454425	Up	0	1	1
A_23_P117506	DHRS7	0.684978	0.149795	Up	0	0	1
A_24_P375609	EIF5A	0.684978	0.335956	Up	0	0	1
A_24_P382319	CEACAM1	0.688654	2.25e-05	Down	0	1	1
A_23_P207014	RAD51C	0.688654	0.000242809	Up	0	1	1
A_23_P104318	DDIT4	0.689035	0.116395	Up	0	0	1
A_23_P374104	ANGPTL2	0.690292	0.892504	Up	0	0	1
A_24_P86537	HSPB1	0.69711	0.684303	Down	0	0	1
A_23_P398460	HK2	0.703078	0.00290733	Down	0	1	1
A_23_P407203	ZEB2	0.704803	0.0924937	Up	0	0	0
A_23_P18447	PPARGC1A	0.704803	0.493597	Down	0	0	1
A_23_P106405	NDN	0.704803	0.879231	Down	0	0	0
A_24_P232049	RABGEF1	0.705021	0.00972591	Down	0	1	1
A_23_P43476	VLDLR	0.705258	0.0784603	Down	0	0	1
A_23_P138725	MARVELD1	0.708739	0.316331	Up	0	0	1
A_24_P383356	SLC39A14	0.711023	0.656319	Up	0	0	1
A_23_P314876	C10orf82	0.715081	0.825267	Down	0	0	0
A_23_P368126	AHCYL1	0.723052	0.230691	Up	0	0	1
A_24_P941268	CA5B	0.726247	0.00375471	Up	0	1	1
A_23_P428260	STEAP2	0.726671	0.318313	Down	0	0	1
A_23_P141429	ABI3	0.726903	0.526451	Up	0	0	1
A_32_P225355	CPEB2	0.726903	0.622116	Up	0	0	1
A_23_P167468	PRLR	0.726903	0.925533	Down	0	0	1
A_23_P120776	SLC25A1	0.730059	0.0804171	Up	0	0	1
A_24_P207195	IRX3	0.730838	0.490009	Up	0	0	1
A_23_P335813	TOB2	0.730951	0.298873	Up	0	0	1
A_24_P98109	SNX10	0.735519	0.393979	Down	0	0	0
A_23_P35099	MRTO4	0.73906	9.05e-05	Up	0	1	1
A_24_P500891	AK2	0.73906	0.0313541	Up	0	1	1
A_23_P391506	IVNS1ABP	0.73906	0.622116	Up	0	0	1
A_24_P63522	HMGCS1	0.744584	0.000187797	Down	0	1	1
A_23_P259357	SLC35E4	0.744584	0.0924937	Down	0	0	1
A_23_P114947	RGS2	0.746608	0.0223072	Up	0	1	1
A_23_P259490	MXD4	0.746608	0.0358727	Up	0	1	1
A_23_P85460	CDKN2C	0.746608	0.441961	Up	0	0	1
A_23_P159325	ANGPTL4	0.746608	0.918596	Up	0	0	1
A_23_P106002	NFKBIA	0.746608	0.950149	Down	0	0	1
A_23_P145024	ADRB2	0.7468	2.6e-06	Up	0	1	1
A_23_P374339	HIF3A	0.7468	0.753684	Up	0	0	1
A_24_P364335	CLEC2D	0.748678	0.00706032	Down	0	1	1
A_23_P434212	SULT1A1	0.748678	0.0282153	Up	0	1	1
A_32_P228167	C12orf50	0.748678	0.304562	Down	0	0	0
A_23_P139722	TNFRSF1A	0.754465	2.25e-05	Down	0	1	1
A_23_P314755	STC1	0.754465	0.000286323	Down	0	1	1
A_24_P319923	MYLK	0.754465	0.0118344	Up	0	1	1
A_23_P120345	PELI1	0.754465	0.0324072	Down	0	1	1
A_24_P287473	SAV1	0.754465	0.114856	Up	0	0	1
A_24_P380861	ANKS6	0.754465	0.136153	Up	0	0	0
A_23_P357360	SLC29A3	0.754465	0.209499	Up	0	0	1
A_23_P219105	FGFR1	0.755575	0.493597	Down	0	0	1
A_24_P20630	LEF1	0.759095	0.0454425	Down	0	1	1
A_23_P128094	ABCB9	0.762262	0.811566	Up	0	0	1
A_23_P164718	SNRPA	0.762742	0.364181	Up	0	0	1
A_23_P423695	MXD4	0.762742	0.541488	Up	0	0	1
A_23_P24997	CDK4	0.762742	0.618805	Up	0	0	1
A_24_P159648	BAIAP2	0.763088	0.0310633	Up	0	1	1
A_24_P157926	TNFAIP3	0.765548	0.0678272	Down	0	0	1
A_24_P93896	CNNM2	0.765548	0.4346	Down	0	0	1
A_23_P21853	AP2A2	0.765548	0.565752	Up	0	0	1
A_23_P202029	ERLIN1	0.765548	0.693115	Down	0	0	1
A_23_P395566	FBXO31	0.765548	0.789896	Up	0	0	1
A_23_P23346	MLLT11	0.768089	0.0313021	Up	0	1	1
A_32_P6139	C4orf19	0.768089	0.868771	Up	0	0	0
A_23_P401709	C20orf196	0.76839	0.0502612	Up	0	0	0
A_23_P82088	NRN1	0.76839	0.0836592	Up	0	0	1
A_23_P215900	SCARA3	0.770963	0.101807	Up	0	0	1
A_24_P277367	CXCL5	0.774832	0.0187606	Up	0	1	1
A_23_P46426	CYR61	0.775796	0.645747	Down	0	0	1
A_24_P262201	SULT1A4	0.776113	0.0137537	Up	0	1	1
A_24_P234462	TMIE	0.776113	0.915061	Down	0	0	0
A_24_P405850	PGRMC2	0.776547	0.00302581	Up	0	1	1
A_24_P942904	BMPER	0.777905	0.149592	Up	0	0	0
A_23_P155755	CXCL6	0.777905	0.16621	Up	0	0	0
A_23_P30294	CDO1	0.777905	0.255469	Down	0	0	0
A_23_P315206	CCBL1	0.777905	0.600109	Up	0	0	1
A_24_P230675	SOCS2	0.778649	0.753684	Down	0	0	1
A_24_P139604	PYHIN1	0.778649	0.764087	Down	0	0	0
A_23_P40453	CBR3	0.78028	0.278583	Up	0	0	0
A_24_P588897	SLCO3A1	0.784946	0.00599891	Down	0	1	1
A_24_P62530	RHOU	0.785388	0.2554	Down	0	0	1
A_24_P298846	C6orf120	0.791225	0.179171	Down	0	0	0
A_23_P105856	SLC46A3	0.791619	0.412417	Down	0	0	1
A_24_P337746	RABGEF1	0.791721	0.4346	Down	0	0	1
A_23_P162668	CPM	0.794167	0.0125345	Down	0	1	0
A_32_P806841	ARL4A	0.794167	0.408725	Down	0	0	1
A_24_P174755	SLC22A5	0.795849	0.0577456	Down	0	0	1
A_23_P115011	ADAMTSL4	0.795849	0.385002	Down	0	0	0
A_23_P133263	HMGCS1	0.795849	0.408725	Down	0	0	1
A_23_P20864	ANGPTL2	0.795849	0.426423	Down	0	0	1
A_23_P303149	FGFR2	0.795849	0.777588	Down	0	0	1
A_24_P150580	RASL12	0.802033	0.0639613	Up	0	0	0
A_24_P156501	EBF1	0.802033	0.070331	Down	0	0	1
A_24_P98249	TACC1	0.802033	0.0716148	Down	0	0	0
A_24_P334005	C1orf123	0.802033	0.0933189	Up	0	0	0
A_23_P29897	AFF1	0.807039	0.124263	Down	0	0	1
A_23_P207879	CARD14	0.811135	0.0639613	Up	0	0	0
A_23_P214222	MARCKS	0.813057	0.16198	Down	0	0	1
A_32_P95960	CLEC2D	0.816833	0.606807	Down	0	0	1
A_23_P119196	KLF2	0.818095	0.00791248	Up	0	1	1
A_23_P3602	NUDT7	0.818095	0.0337877	Down	0	1	1
A_24_P322709	SNTA1	0.818095	0.233354	Down	0	0	1
A_23_P155601	FMO3	0.818095	0.316881	Up	0	0	0
A_23_P70849	NOS3	0.818095	0.37612	Up	0	0	0
A_23_P54846	HERPUD1	0.818095	0.38199	Down	0	0	1
A_24_P371962	AMD1	0.818095	0.719868	Down	0	0	1
A_23_P31097	OSTM1	0.819107	0.116274	Up	0	0	1
A_23_P151649	APEX1	0.819107	0.400895	Down	0	0	1
A_23_P48266	FBXW8	0.819107	0.645747	Up	0	0	1
A_24_P228302	CEACAM7	0.822874	0.26297	Up	0	0	0
A_23_P56709	RNF103	0.824752	0.194143	Down	0	0	1
A_24_P250335	SNRPA	0.824752	0.753684	Up	0	0	1
A_23_P217009	C9orf24	0.831963	0.0266573	Up	0	1	0
A_23_P423543	REEP3	0.831963	0.254393	Down	0	0	1
A_24_P406939	C11orf1	0.831963	0.433376	Up	0	0	0
A_23_P74609	G0S2	0.832657	0.0583349	Up	0	0	1
A_23_P306919	CXorf40B	0.833537	0.00266417	Up	0	1	0
A_23_P39309	PSG9	0.833537	0.825267	Up	0	0	1
A_23_P108143	GAMT	0.833657	0.0387878	Up	0	1	1
A_23_P72697	GPIHBP1	0.833657	0.136024	Up	0	0	0
A_24_P179903	AK2	0.833657	0.731915	Up	0	0	1
A_24_P331761	PSG7	0.833657	0.766795	Down	0	0	1
A_23_P76488	EMP1	0.836784	3.28e-05	Up	0	1	1
A_23_P65230	TMTC4	0.836833	0.000568824	Down	0	1	1
A_24_P11142	KIAA0040	0.837632	0.00408848	Down	0	1	1
A_23_P415401	KLF9	0.837679	2.6e-06	Up	0	1	1
A_24_P174367	PPP1R2	0.83824	0.00547854	Down	0	1	1
A_23_P143817	MYLK	0.838559	0.000112019	Up	0	1	1
A_23_P211829	ZXDC	0.838559	0.208978	Up	0	0	1
A_23_P203475	PRKCDBP	0.838559	0.391356	Down	0	0	1
A_23_P344531	SYNPO	0.838559	0.840506	Down	0	0	0
A_24_P318836	FZR1	0.838559	0.903475	Down	0	0	1
A_23_P98085	PTEN	0.83952	0.179171	Down	0	0	1
A_24_P340390	CPEB2	0.849775	0.000777139	Up	0	1	1
A_24_P24905	DIRAS2	0.852387	0.374159	Up	0	0	0
A_23_P350249	GLIS3	0.852387	0.469288	Up	0	0	1
A_24_P116710	RAMP2	0.852387	0.55382	Down	0	0	1
A_23_P155868	PGRMC2	0.852387	0.599424	Up	0	0	1
A_24_P40737	PRLR	0.852387	0.698686	Up	0	0	1
A_32_P233688	C20orf85	0.852387	0.837039	Up	0	0	0
A_24_P914155	USP54	0.852387	0.938796	Down	0	0	0
A_23_P209625	CYP1B1	0.857225	0.000494043	Down	0	1	1
A_23_P24444	DHCR7	0.857225	0.0107881	Up	0	1	1
A_32_P223017	MAP3K6	0.857225	0.0559756	Up	0	0	1
A_23_P23017	C1orf123	0.857225	0.0732207	Up	0	0	0
A_32_P76247	HSPB1	0.857225	0.84347	Up	0	0	1
A_24_P4171	FGFR1	0.861151	0.350868	Up	0	0	1
A_23_P211445	LIMK2	0.863485	4.78e-05	Up	0	1	1
A_24_P36898	AL832451	0.863485	0.0194782	Down	0	1	0
A_23_P112548	HDHD3	0.863485	0.690953	Up	0	0	1
A_23_P211039	ADAMTS1	0.863634	0.0800809	Up	0	0	1
A_23_P114774	PMVK	0.86662	1.87e-05	Up	0	1	1
A_23_P91390	THBD	0.871795	0.000123058	Up	0	1	1
A_32_P231415	SCD	0.871795	0.00200755	Up	0	1	1
A_24_P330668	UBFD1	0.871795	0.112466	Down	0	0	1
A_23_P14340	KIAA0391	0.871795	0.128139	Down	0	0	1
A_23_P148446	UBE2A	0.871795	0.573479	Down	0	0	1
A_23_P51958	NBL1	0.871795	0.66392	Down	0	0	1
A_23_P216742	PAPPA	0.871795	0.705925	Down	0	0	1
A_23_P257905	CENPB	0.8794	0.575679	Up	0	0	1
A_23_P59192	SNRPC	0.879413	0.00599891	Up	0	1	1
A_24_P31235	EIF5A	0.880242	0.478911	Up	0	0	1
A_23_P51136	RHOB	0.881679	0.10129	Up	0	0	1
A_24_P347480	NEK9	0.881679	0.140255	Down	0	0	1
A_23_P6914	OSBPL11	0.881679	0.301009	Down	0	0	1
A_23_P103561	NAV1	0.881679	0.352612	Down	0	0	0
A_23_P52749	ADAMTS15	0.881679	0.354984	Down	0	0	1
A_24_P123190	PLD1	0.881679	0.624092	Up	0	0	1
A_24_P54131	DCLRE1B	0.881679	0.933686	Up	0	0	1
A_23_P114707	H6PD	0.885578	0.560559	Down	0	0	1
A_24_P88850	MRAS	0.889698	0.0550546	Up	0	0	0
A_23_P88303	HSPA2	0.889698	0.209499	Down	0	0	1
A_23_P134935	DUSP4	0.889698	0.236414	Up	0	0	1
A_23_P377750	FGF10	0.889698	0.296611	Up	0	0	0
A_23_P4696	PPAN-P2RY11	0.889698	0.350868	Up	0	0	1
A_32_P197561	EBF1	0.889698	0.356359	Down	0	0	1
A_23_P206724	MT1E	0.889698	0.813003	Up	0	0	1
A_24_P250333	SNRPA	0.892845	0.263008	Up	0	0	1
A_24_P68342	COL4A1	0.892845	0.642517	Up	0	0	0
A_24_P769672	C12orf73	0.893506	0.00277614	Down	0	1	0
A_23_P48936	SMAD3	0.893506	0.0635411	Up	0	0	1
A_24_P234732	MXD4	0.893506	0.112466	Up	0	0	1
A_24_P925940	ZXDC	0.893506	0.354881	Up	0	0	1
A_24_P402438	TGFB2	0.893506	0.513053	Down	0	0	1
A_23_P129695	VASN	0.893506	0.601176	Up	0	0	1
A_23_P204654	KITLG	0.893506	0.962749	Up	0	0	1
A_24_P706752	PLA2G12A	0.89694	0.431672	Down	0	0	1
A_23_P219197	RGS3	0.898043	0.101832	Down	0	0	0
A_23_P85853	TMEM53	0.898043	0.819406	Up	0	0	1
A_32_P80597	AK026192	0.898242	0.00246989	Up	0	1	0
A_24_P278853	TMTC4	0.898242	0.171011	Up	0	0	1
A_23_P163955	PEMT	0.898242	0.22247	Up	0	0	1
A_23_P144096	CISH	0.898242	0.408725	Down	0	0	1
A_23_P102391	SLC40A1	0.900947	0.00706032	Down	0	1	1
A_32_P7721	RORA	0.900947	0.0821694	Up	0	0	0
A_23_P253958	LRRC17	0.900947	0.310689	Down	0	0	0
A_24_P393864	PHTF1	0.900947	0.560676	Down	0	0	1
A_24_P403417	PTGES	0.900947	0.813003	Down	0	0	0
A_23_P203183	APOC3	0.902634	0.47456	Up	0	0	1
A_23_P53162	STIM1	0.91222	0.284699	Up	0	0	1
A_23_P149626	PLEKHG5	0.91222	0.287558	Down	0	0	0
A_23_P128323	SCNN1A	0.91222	0.335956	Down	0	0	1
A_23_P126757	INTS3	0.91222	0.37844	Up	0	0	1
A_24_P90878	THUMPD1	0.91222	0.391356	Down	0	0	1
A_23_P395534	RSC1A1	0.91222	0.517695	Up	0	0	0
A_23_P34345	VCAM1	0.91222	0.776233	Up	0	0	1
A_24_P292831	C16orf70	0.91222	0.976551	Up	0	0	0
A_23_P141362	FZD2	0.915736	0.4346	Up	0	0	1
A_23_P95553	WDR6	0.917789	0.0026692	Up	0	1	1
A_23_P149847	LZTS2	0.918512	0.443832	Down	0	0	1
A_23_P162589	VDR	0.918618	0.004625	Up	0	1	1
A_24_P186414	ZFAND3	0.918618	0.0337877	Up	0	1	1
A_24_P189739	DUSP16	0.918618	0.128139	Down	0	0	1
A_23_P36724	FBXL14	0.918618	0.211897	Down	0	0	1
A_23_P59950	SLC39A14	0.918618	0.514953	Up	0	0	1
A_23_P16096	PPAN	0.918618	0.641135	Down	0	0	1
A_32_P40272	RORA	0.919067	0.128139	Down	0	0	0
A_23_P250825	RABGEF1	0.919067	0.151785	Down	0	0	1
A_23_P324490	KIAA0355	0.919067	0.700057	Up	0	0	1
A_23_P69171	SUCNR1	0.919373	0.212666	Up	0	0	0
A_23_P135239	TLE1	0.919373	0.294628	Up	0	0	1
A_23_P146830	SLC25A10	0.919373	0.461083	Up	0	0	1
A_23_P307346	CA5B	0.919373	0.556895	Up	0	0	1
A_24_P538478	MED28	0.919848	0.428147	Down	0	0	1
A_23_P142560	ZEB2	0.921389	0.335956	Up	0	0	0
A_24_P64781	KITLG	0.921389	0.605649	Up	0	0	1
A_23_P161338	PPA1	0.922064	0.000897146	Down	0	1	1
A_24_P269624	CDC37L1	0.923799	0.0283817	Down	0	1	1
A_23_P318904	SERTAD4	0.923799	0.086609	Up	0	0	0
A_23_P145761	ARL4A	0.923799	0.389485	Down	0	0	1
A_24_P940059	IPCEF1	0.923799	0.756569	Up	0	0	1
A_24_P126210	MRAP	0.923803	0.4346	Down	0	0	0
A_23_P19673	SGK1	0.924894	0.204337	Up	0	0	1
A_24_P932632	CR617018	0.924894	0.257011	Down	0	0	0
A_23_P158461	RFC1	0.924894	0.301009	Up	0	0	1
A_24_P920730	GDPD1	0.924894	0.362202	Down	0	0	1
A_24_P177581	C10orf53	0.924894	0.47456	Up	0	0	0
A_23_P3792	SLC7A5	0.92598	0.278583	Up	0	0	1
A_23_P130948	PSG11	0.936413	0.0817657	Up	0	0	1
A_23_P337242	TGFBR2	0.936534	0.163972	Up	0	0	1
A_23_P51339	DNAJB4	0.936727	0.0227407	Down	0	1	1
A_32_P175739	HK2	0.936727	0.0550546	Down	0	0	1
A_23_P120883	HMOX1	0.936727	0.0577456	Up	0	0	1
A_24_P931744	STBD1	0.936727	0.854298	Up	0	0	1
A_23_P250800	ST3GAL6	0.939746	1.87e-05	Down	0	1	1
A_23_P16992	PKP4	0.939746	0.875466	Down	0	0	1
A_23_P24966	USP2	0.942337	0.616714	Up	0	0	1
A_32_P74643	ALCAM	0.945078	0.546963	Up	0	0	1
A_23_P206707	MT1G	0.945078	0.603771	Down	0	0	0
A_24_P924697	AK055915	0.945533	0.0677879	Down	0	0	0
A_23_P94095	ANKRD46	0.949445	0.0037821	Down	0	1	1
A_23_P351270	PAPPA	0.95103	0.810482	Down	0	0	1
A_24_P28977	TRPC1	0.952077	0.000700622	Down	0	1	1
A_23_P87150	LPXN	0.952077	0.00114773	Up	0	1	1
A_23_P8281	IFNGR1	0.952077	0.00275554	Down	0	1	1
A_23_P110712	DUSP1	0.952077	0.00375471	Up	0	1	1
A_23_P12062	TRIT1	0.952077	0.00598911	Down	0	1	1
A_23_P143650	DUSP18	0.952077	0.0678008	Up	0	0	1
A_23_P111361	PPIL6	0.952077	0.111167	Up	0	0	1
A_23_P210939	EIF6	0.952077	0.213201	Up	0	0	1
A_23_P202334	FGFR2	0.952077	0.252292	Down	0	0	1
A_24_P943143	C16orf70	0.952077	0.271453	Up	0	0	0
A_24_P393958	DNAJB4	0.952077	0.278583	Down	0	0	1
A_23_P316012	RHOJ	0.952077	0.493511	Down	0	0	0
A_23_P94103	SCARA5	0.952077	0.493597	Down	0	0	1
A_24_P319088	CCL23	0.952077	0.544644	Up	0	0	0
A_24_P145653	MAP3K6	0.952077	0.544644	Up	0	0	1
A_23_P144134	C3orf58	0.952077	0.55382	Down	0	0	0
A_23_P404785	OSTM1	0.952077	0.630577	Down	0	0	1
A_23_P421401	PDGFRB	0.952077	0.834705	Up	0	0	0
A_23_P218555	FOSL2	0.952824	9.52e-05	Up	0	1	1
A_23_P20970	ATG12	0.952824	0.0651452	Down	0	0	1
A_24_P19228	GAMT	0.952824	0.0836592	Up	0	0	1
A_23_P142335	PSG2	0.952824	0.128139	Down	0	0	1
A_23_P39304	PSG9	0.952824	0.524222	Down	0	0	1
A_23_P158053	C9orf16	0.952824	0.678595	Up	0	0	0
A_24_P153803	RHOJ	0.952824	0.847442	Up	0	0	0
A_24_P940909	TTC7A	0.952824	0.965524	Down	0	0	1
A_23_P32253	NFIL3	0.953631	0.0275459	Down	0	1	1
A_32_P110372	SLC8A1	0.953631	0.0598779	Up	0	0	0
A_24_P337000	TTC7A	0.953631	0.208978	Down	0	0	1
A_23_P203267	TRIM29	0.953631	0.513052	Up	0	0	1
A_24_P241183	CLEC2D	0.953631	0.562488	Down	0	0	1
A_24_P412088	MCM10	0.953631	0.950149	Down	0	0	1
A_23_P209636	CDC42EP3	0.956619	0.254393	Up	0	0	1
A_23_P161474	MCM10	0.957596	0.335956	Down	0	0	1
A_24_P913900	SLC8A1	0.958711	0.00805339	Up	0	1	0
A_23_P168993	ADRB3	0.958711	0.0357301	Down	0	1	0
A_23_P49842	UNC119	0.958711	0.111276	Up	0	0	1
A_23_P30884	CLIC1	0.958711	0.212666	Up	0	0	0
A_23_P341532	SETDB2	0.958853	0.00135146	Up	0	1	1
A_24_P336754	MCL1	0.958853	0.409954	Down	0	0	1
A_23_P6674	LXN	0.962382	0.0448345	Down	0	1	1
A_23_P61810	BAIAP2	0.970048	0.493417	Up	0	0	1
A_24_P922397	ZXDC	0.970048	0.784805	Down	0	0	1
A_23_P120316	MTHFD2	0.970423	0.00560288	Down	0	1	1
A_23_P63618	SCD	0.970423	0.0116088	Down	0	1	1
A_23_P156185	SHROOM1	0.970423	0.0670007	Up	0	0	0
A_24_P19544	STK39	0.970423	0.154552	Up	0	0	0
A_23_P76109	RILPL2	0.970423	0.55382	Down	0	0	1
A_23_P384023	GLIS3	0.970423	0.789896	Up	0	0	1
A_23_P206382	C16orf70	0.972594	0.844632	Up	0	0	0
A_23_P32955	MERTK	0.97285	0.686466	Down	0	0	1
A_23_P141520	C17orf49	0.973076	0.128139	Up	0	0	0
A_23_P116286	AMPD3	0.973076	0.490009	Down	0	0	0
A_24_P209772	DCTN3	0.973076	0.523913	Up	0	0	1
A_24_P333479	SLC39A14	0.979199	0.273317	Up	0	0	1
A_23_P202104	PPIF	0.980007	0.296611	Up	0	0	1
A_23_P50039	MC5R	0.980007	0.318313	Down	0	0	0
A_23_P68786	PRODH	0.980007	0.490009	Up	0	0	0
A_32_P9842	MTMR14	0.980007	0.524222	Up	0	0	1
A_23_P146554	PTGDS	0.980007	0.570923	Up	0	0	1
A_23_P153958	INHBB	0.982913	0.00713264	Up	0	1	0
A_24_P204976	C9orf131	0.982913	0.015891	Up	0	1	0
A_23_P90762	STK39	0.982913	0.128213	Up	0	0	0
A_32_P147078	SLC8A1	0.982913	0.133322	Down	0	0	0
A_23_P12554	PKD2L1	0.982913	0.136153	Down	0	0	0
A_24_P22800	PSG11	0.982913	0.206469	Down	0	0	1
A_23_P5610	DOK1	0.982913	0.252292	Up	0	0	1
A_23_P79134	PLEKHF1	0.982913	0.3028	Up	0	0	1
A_23_P30020	PLA2G12A	0.982913	0.820077	Down	0	0	1
A_24_P107317	USP2	0.986839	0.25229	Up	0	0	1
A_23_P131614	COL6A3	0.987572	0.00130793	Down	0	1	0
A_23_P162918	SERPINA3	0.988452	0.019946	Up	0	1	1
A_23_P97871	ARID5B	0.988452	0.813069	Up	0	0	1
A_23_P84666	GDPD1	0.994192	0.116867	Down	0	0	1
A_23_P140792	EEF2K	0.995185	0.565752	Up	0	0	1
A_24_P680857	AB002449	0.997898	0.262066	Down	0	0	0
A_24_P252785	PTEN	0.998253	1.32e-05	Down	0	1	1
A_24_P38081	FKBP5	0.998253	0.000579546	Down	0	1	1
A_23_P20558	CDC37L1	0.998253	0.0024056	Down	0	1	1
A_24_P295245	ASPH	0.998253	0.00325656	Up	0	1	1
A_23_P421493	HPR	0.998253	0.00375471	Up	0	1	1
A_23_P315836	BAIAP2	0.998253	0.00573798	Up	0	1	1
A_23_P366812	AQP5	0.998253	0.0077009	Down	0	1	1
A_32_P207360	AK2	0.998253	0.0102375	Down	0	1	1
A_24_P37903	LOX	0.998253	0.0104475	Up	0	1	0
A_24_P120934	GADD45G	0.998253	0.0145286	Up	0	1	1
A_23_P167096	VEGFC	0.998253	0.019659	Up	0	1	1
A_24_P115774	BIRC2	0.998253	0.0227407	Down	0	1	1
A_23_P154379	NAT8	0.998253	0.0331193	Down	0	1	1
A_23_P18901	ATG12	0.998253	0.0358135	Up	0	1	1
A_23_P204689	CLEC2D	0.998253	0.0432292	Down	0	1	1
A_24_P147765	FOXRED2	0.998253	0.0502612	Down	0	0	1
A_23_P51499	PRELP	0.998253	0.0651452	Down	0	0	0
A_24_P213912	CENPB	0.998253	0.0918342	Down	0	0	1
A_23_P142187	HIF3A	0.998253	0.0933189	Down	0	0	1
A_23_P103062	RNF185	0.998253	0.101407	Up	0	0	1
A_23_P59210	CDKN1A	0.998253	0.101944	Up	0	0	1
A_24_P314477	TUBB2B	0.998253	0.101944	Up	0	0	1
A_23_P59268	RANBP9	0.998253	0.120661	Down	0	0	1
A_23_P19095	SNX24	0.998253	0.128139	Up	0	0	1
A_23_P20660	DIRAS2	0.998253	0.136153	Up	0	0	0
A_23_P120860	NIPSNAP1	0.998253	0.140416	Up	0	0	1
A_24_P326491	MKX	0.998253	0.265145	Up	0	0	0
A_24_P133905	CCL23	0.998253	0.278583	Down	0	0	0
A_23_P155335	PLD1	0.998253	0.316572	Down	0	0	1
A_23_P94660	TBC1D13	0.998253	0.334838	Up	0	0	1
A_24_P151305	KLF2	0.998253	0.335956	Up	0	0	1
A_23_P50697	PSG1	0.998253	0.335956	Up	0	0	0
A_23_P303317	ZXDC	0.998253	0.360991	Up	0	0	1
A_23_P158024	DCTN3	0.998253	0.389498	Up	0	0	1
A_23_P142333	FZR1	0.998253	0.391356	Up	0	0	1
A_23_P10206	HAS2	0.998253	0.391356	Down	0	0	1
A_24_P313822	PAK4	0.998253	0.397967	Down	0	0	1
A_24_P373976	SDC4	0.998253	0.407413	Up	0	0	1
A_23_P168306	WASF1	0.998253	0.417901	Down	0	0	1
A_32_P86763	TGM2	0.998253	0.443793	Up	0	0	1
A_24_P934477	CBR3	0.998253	0.493417	Up	0	0	0
A_24_P184154	CNNM2	0.998253	0.547294	Down	0	0	1
A_23_P112162	DGAT1	0.998253	0.555065	Up	0	0	1
A_23_P89310	EPN2	0.998253	0.629265	Up	0	0	1
A_23_P207280	APPBP2	0.998253	0.651366	Down	0	0	1
A_23_P205074	SLC46A3	0.998253	0.651366	Down	0	0	1
A_23_P39590	XDH	0.998253	0.656319	Down	0	0	1
A_32_P117723	NUDT4	0.998253	0.745954	Down	0	0	1
A_23_P353905	AK093617	0.998253	0.797715	Down	0	0	0
A_32_P85106	C6orf118	0.998253	0.933686	Up	0	0	0
A_23_P153301	CEACAM5	0.998253	0.938796	Down	0	0	0
A_24_P7143	MYO1B	0.998253	0.942793	Up	0	0	1
A_23_P142796	LIMS2	0.998253	0.949171	Up	0	0	0
A_23_P155596	FMO3	0.998253	0.995166	Up	0	0	0
