# Supplementary material for: Mistimed sleep and waking activity in humans disrupts glucocorticoid signalling transcripts and SP1, but not plasma cortisol rhythms
Source: Front Physiol. 2022 Aug 17;13:946444. doi: 10.3389/fphys.2022.946444 (PMC9428761; doi:10.3389/fphys.2022.946444)
Supplement: Supplementary file 2 [file Table3.XLSX]

## Sheet: ArcherSupplementalDataFile3_rev
Probe_ID	Gene_Symbols	Sleep_condition_BHp	Sleep_condition_x_cortisolbin_interaction_BHp	Sleep_out.of.phase_up.down_regulation	Significant_MainEffect	Significant_Interaction	SP1_site
A_23_P49021	WDR61	0.98845	0.00010634	Down	0	1	1
A_24_P269814	PLEKHA1	0.758381	0.0443602	Down	0	1	1
A_24_P73290	ATP2A2	0.939569	0.663433	Down	0	0	1
A_23_P72235	PHF2	0.121902	0.125231	Down	0	0	0
A_24_P329597	UBQLN1	0.488186	0.85492	Down	0	0	1
A_23_P65555	SAV1	0.222258	0.102487	Down	0	0	1
A_32_P179258	RAB22A	3.55e-07	0.0102941	Down	1	1	1
A_23_P350551	C12orf57	0.797751	0.00109634	Up	0	1	0
A_23_P257911	USP16	0.996074	0.00127626	Down	0	1	1
A_23_P119042	NKG7	0.524913	0.456443	Up	0	0	1
A_32_P117338	AFG3L2	0.029528	0.054264	Down	1	0	1
A_23_P58912	SLC35A1	0.944843	0.000660724	Down	0	1	1
A_24_P261005	C8orf40	0.707959	0.00539353	Up	0	1	0
A_23_P42848	KRIT1	0.0458712	0.233203	Down	1	0	1
A_23_P71064	SP4	0.179311	0.0745795	Down	0	0	1
A_23_P1056	GPR89B	0.757995	0.0508153	Up	0	0	1
A_23_P56559	DHRS9	0.499813	0.00557466	Down	0	1	0
A_23_P12989	PRDX5	0.0383927	0.412443	Up	1	0	1
A_24_P291680	CNOT6L	0.0473293	0.222309	Down	1	0	1
A_24_P941051	CSTF2T	0.655738	0.206495	Down	0	0	1
A_23_P200890	GOLPH3L	0.614587	0.831145	Up	0	0	1
A_24_P917492	TTLL3	0.998599	0.318372	Down	0	0	1
A_24_P286013	UBE2K	0.646657	0.310341	Down	0	0	1
A_24_P405190	USP33	0.116361	0.855205	Up	0	0	1
A_23_P95029	SNTB1	0.363475	0.52207	Down	0	0	0
A_32_P437227	FAM84B	0.496911	0.337688	Down	0	0	1
A_24_P144499	PPIAL4A	0.0826666	0.824867	Up	0	0	0
A_23_P201035	GBA	0.342007	0.0251354	Down	0	1	1
A_23_P56759	KRCC1	0.952018	0.000465332	Down	0	1	1
A_24_P171601	NKTR	0.028856	0.419028	Down	1	0	1
A_24_P374634	STAU2	0.802793	0.72437	Down	0	0	1
A_24_P23400	SLC6A8	0.636452	0.204301	Up	0	0	0
A_23_P120316	MTHFD2	0.970208	0.00315826	Down	0	1	1
A_23_P151586	TM9SF1	0.424117	0.22867	Down	0	0	1
A_23_P218905	UBA6	0.880011	0.869546	Up	0	0	1
A_24_P911928	MYBL1	0.685441	0.352228	Down	0	0	1
A_32_P489959	ZNF546	0.95675	0.313883	Up	0	0	1
A_23_P151565	RALGAPA1	0.960466	0.00936037	Down	0	1	1
A_23_P120572	RIN2	0.331673	0.859143	Down	0	0	1
A_23_P408675	BTAF1	0.929491	0.0088314	Down	0	1	1
A_23_P148273	MAGT1	0.99336	0.932508	Up	0	0	1
A_23_P81392	WWC1	0.622513	0.00402318	Down	0	1	1
A_32_P133005	DCAF10	0.693387	0.30548	Down	0	0	1
A_24_P153820	HYDIN	0.526653	0.792842	Up	0	0	1
A_23_P6746	IQSEC1	0.600499	0.0038435	Up	0	1	1
A_23_P162874	HSP90AA1	0.000237909	0.00357092	Down	1	1	1
A_24_P69691	ZNF25	0.609749	0.588707	Down	0	0	1
A_23_P68889	C22orf28	0.929798	0.00839564	Down	0	1	0
A_23_P76386	SLC6A12	0.288736	0.619508	Down	0	0	1
A_24_P388659	ARHGAP24	0.00057644	0.245574	Down	1	0	1
A_24_P73178	PRR13	0.952654	0.0398764	Up	0	1	1
A_24_P56252	PPP1R12A	0.929491	0.410167	Down	0	0	1
A_23_P94095	ANKRD46	0.947525	0.00219349	Down	0	1	1
A_24_P386334	SH3GLB2	0.977141	0.386785	Up	0	0	1
A_32_P225604	RPL5	0.908784	0.00978676	Up	0	1	1
A_23_P90804	MAP4K4	0.494497	0.00276891	Down	0	1	1
A_24_P109272	ADD1	0.620304	0.753392	Down	0	0	1
A_24_P414419	HADH	0.892938	0.00472197	Up	0	1	1
A_23_P82206	ECHDC1	0.992247	0.000112707	Down	0	1	1
A_32_P98435	PCMTD1	0.947762	0.480324	Down	0	0	1
A_23_P1248	C10orf26	0.458545	0.0266489	Down	0	1	0
A_23_P35591	EXOSC1	0.989638	0.0740309	Up	0	0	1
A_32_P207117	TSPYL6	0.169174	0.320213	Up	0	0	0
A_23_P41255	G3BP2	0.000123206	0.362893	Down	1	0	1
A_24_P253454	RGMA	0.989638	0.0444419	Up	0	1	0
A_24_P138556	EIF2S1	0.994127	0.000822809	Down	0	1	1
A_24_P176284	BBS4	0.00363781	0.00920545	Down	1	1	1
A_23_P251186	PROSC	0.239379	0.416638	Down	0	0	1
A_23_P253464	FAM175A	0.850177	0.000591145	Down	0	1	1
A_23_P118306	DNAJA3	0.488325	0.00236965	Down	0	1	1
A_23_P386168	PRR24	0.969499	0.408153	Up	0	0	0
A_24_P394702	ARF5	0.899258	0.0201518	Up	0	1	1
A_23_P501435	CSRP2BP	0.990626	0.00228497	Up	0	1	0
A_23_P328298	ODF2L	0.826213	0.00222082	Down	0	1	1
A_32_P44657	ST13	0.940444	0.39431	Up	0	0	1
A_24_P108301	RTTN	0.977658	0.215841	Down	0	0	1
A_23_P210538	ELMO2	0.0826666	0.256308	Down	0	0	1
A_24_P179351	TPT1	0.826766	0.000324262	Down	0	1	1
A_24_P354615	MTMR12	0.738373	0.381635	Down	0	0	1
A_24_P259083	SIRPA	0.44083	0.208116	Down	0	0	0
A_24_P161293	NBPF1	0.0529997	0.0467301	Down	0	1	1
A_24_P30844	C15orf28	0.634039	0.0791924	Down	0	0	0
A_23_P85004	DIAPH2	0.253406	0.379503	Down	0	0	1
A_23_P214059	NR3C1	0.994651	0.0153102	Up	0	1	1
A_23_P82296	GNB2	0.501641	0.0727575	Up	0	0	1
A_23_P71389	MTMR9	0.6789	0.0100138	Down	0	1	1
A_32_P155786	RPS2	0.609306	0.71917	Down	0	0	1
A_23_P167674	F12	0.734498	0.0461161	Up	0	1	1
A_24_P917650	COQ2	0.528756	0.618122	Up	0	0	1
A_23_P63655	ATP5C1	0.817986	0.00446099	Up	0	1	1
CPID_599	PER1	0.622754	0.378841	Down	0	0	1
A_23_P84587	WNK1	0.582469	0.139375	Down	0	0	1
A_24_P225719	MOBKL3	0.558338	0.217731	Up	0	0	0
A_23_P2683	RPAP3	0.926454	8.67e-05	Down	0	1	1
CPID_581	TIMELESS	0.993009	0.409517	Up	0	0	1
A_23_P214935	VNN3	0.788964	6.01e-06	Down	0	1	1
A_23_P387000	XKR6	0.976287	0.0100253	Up	0	1	1
A_23_P89941	CDKN2D	0.280275	0.0164802	Up	0	1	1
A_24_P192197	WRNIP1	0.628215	0.0277722	Up	0	1	1
A_24_P893239	COX7B	0.317978	0.0366459	Up	0	1	1
A_24_P56240	CPNE8	0.770432	0.034909	Down	0	1	1
A_32_P156892	ST13	0.00548205	0.789036	Down	1	0	1
A_24_P27373	PLDN	0.325014	0.586858	Down	0	0	0
A_24_P305570	RIN2	0.471892	0.466089	Down	0	0	1
A_24_P109554	CEP110	0.0104106	0.906164	Down	1	0	0
A_32_P50834	DIAPH2	0.991563	0.652176	Down	0	0	1
A_23_P62128	MTM1	0.687092	0.393033	Down	0	0	1
A_24_P237265	MAPK1	0.116361	0.000104244	Down	0	1	1
A_23_P168490	HERPUD2	0.123572	0.0377286	Down	0	1	1
A_23_P257895	MAPK1	0.734498	0.00641972	Down	0	1	1
A_23_P313961	NME6	0.0811245	0.119181	Down	0	0	1
A_24_P385190	SLC4A1	0.711092	0.0621845	Up	0	0	0
A_24_P291826	SYTL3	0.674134	0.0122035	Down	0	1	1
A_23_P96350	PRAF2	0.976287	0.292566	Up	0	0	1
A_23_P256868	DCP2	0.86369	0.202766	Down	0	0	1
A_23_P59921	SUB1	0.939275	0.000290735	Down	0	1	1
A_24_P649388	C21orf63	0.0991667	0.028877	Down	0	1	0
A_24_P203909	RPL34	0.632285	0.00301025	Up	0	1	1
A_23_P216068	ATAD2	0.359776	0.0349047	Down	0	1	1
A_23_P138686	NMT2	0.271601	0.00174133	Down	0	1	1
A_23_P58002	TCTA	0.45719	0.393033	Up	0	0	1
A_23_P35349	SVIL	0.468159	0.000145884	Down	0	1	1
A_23_P101351	ZNF426	0.339451	0.0461623	Down	0	1	1
A_23_P356004	KCNIP3	0.612656	0.204301	Up	0	0	0
A_23_P84047	PABPC5	0.629881	0.180992	Up	0	0	0
A_23_P39684	TLK1	0.93794	0.569121	Up	0	0	0
A_24_P928986	MYST3	0.930997	0.411387	Down	0	0	0
A_24_P37319	ACSL3	0.252934	0.197424	Down	0	0	1
A_23_P71300	CCDC25	0.221594	0.000845271	Down	0	1	1
A_24_P176044	DNM1L	0.300221	0.0053143	Down	0	1	1
A_23_P351866	NLRP8	0.537115	0.389982	Up	0	0	0
A_23_P152234	CMTM2	0.058891	0.00140472	Up	0	1	0
A_24_P384755	NOL10	0.0138666	0.464336	Down	1	0	1
A_24_P243881	TCEB1	0.991563	0.0577523	Down	0	0	1
A_24_P305556	MCM8	0.501832	0.0698082	Down	0	0	1
A_23_P340263	RNF175	0.0916986	1.23e-05	Up	0	1	0
A_24_P835763	PCF11	0.998106	0.0221691	Down	0	1	1
A_32_P109057	RABL3	0.547685	0.279543	Up	0	0	1
A_23_P82051	FAM165B	0.991551	0.000321674	Down	0	1	0
A_32_P220307	RPL39	0.829923	0.00525488	Down	0	1	1
A_24_P32849	HNRNPA1L2	0.479453	0.83161	Up	0	0	1
A_23_P63798	KLF6	0.5442	0.0116503	Down	0	1	1
A_23_P149695	C1orf203	0.681714	0.00121842	Down	0	1	0
A_23_P51355	KIAA2013	0.890414	0.112257	Down	0	0	1
A_24_P131697	ACTR8	0.766079	0.334414	Down	0	0	1
A_23_P76961	RPS29	0.372919	0.0224212	Up	0	1	1
A_23_P364236	MGA	0.579379	0.393523	Down	0	0	1
A_23_P152024	CSK	0.577753	0.517804	Down	0	0	1
A_24_P265064	SHROOM4	0.880585	0.666471	Up	0	0	1
A_24_P265856	SENP7	0.835338	0.0497269	Down	0	1	1
A_24_P286898	AB074280	0.840461	0.498243	Down	0	0	0
A_23_P151653	APEX1	0.622754	0.00556928	Down	0	1	1
A_23_P201181	PTPN22	0.614587	0.583482	Down	0	0	1
A_23_P91727	PICK1	0.575053	0.14769	Up	0	0	1
A_23_P147826	RAP2C	0.994416	0.0375275	Down	0	1	1
A_23_P54297	EIF3J	0.948484	7.44e-05	Down	0	1	1
A_24_P310616	SLC35A2	0.779969	0.453681	Up	0	0	1
A_23_P165219	PRAM1	0.770285	0.0389679	Up	0	1	0
A_23_P26511	GDPD3	0.239379	0.343915	Up	0	0	0
A_23_P166640	ARL6IP5	0.756996	0.00393386	Up	0	1	1
A_23_P117558	FKBP3	0.673963	0.000309749	Up	0	1	1
A_24_P214858	TREML2	0.816377	4.33e-05	Down	0	1	0
A_32_P129527	C6orf70	0.834361	0.152725	Down	0	0	0
A_24_P110062	PTPMT1	0.810851	0.00311032	Up	0	1	1
A_23_P65768	RSL24D1	0.829493	0.000379955	Down	0	1	1
A_23_P202080	TSPAN14	0.499821	0.631944	Down	0	0	1
A_24_P272873	RPL13AP3	0.998599	0.086803	Down	0	0	0
A_24_P398950	UNC45A	0.355587	0.124668	Down	0	0	1
A_23_P171223	CXorf56	0.358867	0.134364	Down	0	0	0
A_32_P190049	LRRC58	0.327579	0.171872	Down	0	0	1
CPID_595	PER1	0.930549	0.107641	Up	0	0	1
A_23_P212779	PARM1	0.123558	0.154325	Down	0	0	0
A_24_P18630	KDM2B	0.969302	0.217731	Up	0	0	1
A_24_P252739	KLF6	0.176745	0.117343	Up	0	0	1
A_23_P206981	VEZF1	0.00429575	0.267669	Down	1	0	1
A_23_P87919	KDM2B	0.970208	0.101636	Up	0	0	1
A_24_P323628	RPL23AP53	0.887327	0.011803	Up	0	1	1
A_23_P252163	DAPK1	0.257491	0.282981	Down	0	0	1
A_24_P128308	KLF6	0.821454	0.501034	Down	0	0	1
A_23_P141335	ARHGAP27	0.792122	0.319681	Up	0	0	1
A_23_P139509	ERGIC2	0.915385	0.013325	Down	0	1	1
A_24_P590560	RRN3	0.0663738	0.265407	Down	0	0	1
A_23_P53288	CNPY2	0.617532	0.00171952	Up	0	1	1
A_24_P396720	PPP1CB	0.976287	0.0906988	Down	0	0	1
A_24_P68229	FRYL	0.131167	0.802825	Down	0	0	1
A_24_P352116	SNHG7	0.219058	0.616987	Up	0	0	1
A_23_P27334	ZFP161	0.38452	0.000892999	Down	0	1	0
A_24_P270814	CRK	0.0590274	0.856345	Down	0	0	1
A_23_P98085	PTEN	0.857709	0.131641	Down	0	0	1
A_23_P2725	RPL21	0.965185	0.000134575	Down	0	1	1
A_23_P380928	TTLL3	0.657968	0.409807	Up	0	0	1
A_24_P351451	OPA1	0.0402156	0.13808	Down	1	0	1
A_23_P151405	CKAP2	0.991173	0.0385971	Down	0	1	1
A_24_P929369	AP4E1	0.664575	0.327332	Down	0	0	1
A_23_P148785	SFT2D2	0.57562	0.184591	Down	0	0	1
A_24_P161086	NFKBIB	0.976255	0.0120441	Up	0	1	1
A_23_P26704	MFSD11	0.35787	0.198479	Up	0	0	1
A_23_P25019	PRIM1	0.802816	0.000125502	Down	0	1	1
A_23_P150286	PSMA1	0.455744	0.0032132	Up	0	1	0
A_24_P417407	ROPN1B	0.560535	0.078986	Up	0	0	0
A_24_P81740	TALDO1	0.771891	0.013217	Up	0	1	1
A_23_P159395	AXIN2	0.904487	0.0617128	Up	0	0	1
A_23_P98930	C12orf35	0.699659	0.424231	Down	0	0	0
A_24_P339869	ZNF295	0.989638	0.103783	Down	0	0	0
A_23_P46378	PIGV	0.812619	0.826636	Down	0	0	1
A_23_P94819	RPH3AL	0.719026	0.142764	Up	0	0	1
A_23_P205098	PDS5B	0.874931	0.0198158	Down	0	1	1
A_23_P106463	OAZ2	0.99336	0.00112934	Up	0	1	1
A_24_P59596	ATAD2	0.844768	0.619925	Down	0	0	1
A_24_P402588	BCL11A	0.715656	0.205237	Down	0	0	1
A_23_P76684	RTN3	0.783969	0.045537	Up	0	1	1
A_24_P17710	KLHL5	0.421803	0.405201	Down	0	0	1
A_23_P217258	CYBB	0.190718	0.906164	Down	0	0	0
A_23_P93524	SAMD3	0.95285	1.25e-05	Up	0	1	0
A_24_P329487	FAM84B	0.988477	0.145696	Down	0	0	1
A_24_P254904	USP48	0.853298	0.172707	Down	0	0	1
A_24_P114124	LAPTM5	0.193149	0.000696829	Down	0	1	1
A_24_P106357	WDR36	0.86912	0.00143546	Down	0	1	1
A_24_P914513	BCKDHB	0.503032	0.788237	Down	0	0	1
A_23_P88249	RBM23	0.168117	0.0049503	Down	0	1	1
A_23_P214876	JARID2	0.993228	0.000184497	Up	0	1	1
A_23_P215070	TSGA14	0.792561	0.171224	Down	0	0	0
A_24_P286054	ZFYVE16	0.822287	0.0707546	Down	0	0	1
A_23_P24384	CCDC88B	0.896892	0.00270999	Up	0	1	1
A_23_P215037	WTAP	0.562692	0.0324125	Up	0	1	1
A_23_P134314	C7orf11	0.785408	0.0312815	Down	0	1	0
A_23_P56146	RAX2	0.988477	0.203755	Up	0	0	0
A_23_P337155	TOM1L2	0.360721	0.158698	Down	0	0	1
A_24_P241330	ZC3H14	0.439046	0.279118	Down	0	0	1
A_23_P10135	NKIRAS2	0.849405	0.384481	Up	0	0	1
A_24_P419276	ZNF248	0.627431	0.071076	Down	0	0	1
A_23_P341537	SETDB2	0.456239	0.00184209	Down	0	1	1
A_23_P252711	LACTB2	0.515915	0.00300024	Up	0	1	1
A_23_P3014	RNASE6	0.843312	0.00289698	Down	0	1	1
A_24_P117896	ATP8B2	0.000353138	0.143948	Down	1	0	1
A_23_P7932	TREML2	0.946684	0.000328983	Up	0	1	0
A_23_P74928	MR1	0.219564	0.139323	Down	0	0	1
A_24_P944458	INSIG2	0.727397	0.0177134	Down	0	1	1
A_24_P58054	SLC9A8	0.276931	0.0151201	Up	0	1	1
A_23_P122001	MSH3	0.000206777	0.293319	Down	1	0	1
A_23_P154488	PNPT1	0.478138	2.21e-05	Down	0	1	1
A_24_P911860	DUSP19	0.0769529	0.718496	Down	0	0	1
A_24_P219156	RBM23	0.43708	0.39088	Down	0	0	1
A_24_P65864	NSFL1C	0.413748	0.0814428	Down	0	0	1
A_23_P13873	MLF2	0.932678	0.197522	Up	0	0	1
A_24_P267619	SIRPA	0.952654	5.71e-06	Down	0	1	0
A_24_P943283	DENND1B	0.910562	0.799709	Down	0	0	0
A_23_P78444	ELP2	0.267837	0.000343772	Down	0	1	1
A_23_P29237	APOL3	0.244422	0.00457524	Down	0	1	0
A_24_P186401	DCLRE1C	0.926376	0.380754	Down	0	0	1
A_24_P393811	TMCO1	0.937455	0.00141738	Down	0	1	1
A_23_P88209	SCFD1	0.863012	0.159053	Up	0	0	1
A_32_P43812	DCUN1D4	0.989185	0.000354513	Down	0	1	1
A_23_P49279	C16orf87	0.657039	0.00724199	Down	0	1	0
A_32_P109794	STYX	0.987052	0.000784765	Down	0	1	1
A_23_P63026	LGALS8	0.753996	0.0253323	Down	0	1	1
A_23_P11144	CHM	0.810617	0.493058	Down	0	0	1
A_23_P111005	YIPF3	0.987209	0.439536	Up	0	0	1
A_23_P16817	CLK1	0.939569	0.000117016	Down	0	1	1
A_23_P41818	ZFR	0.427466	0.0509435	Down	0	0	0
A_23_P201605	DENND1B	0.610497	0.749764	Down	0	0	0
A_24_P401174	KIAA0556	0.0359496	0.75427	Down	1	0	1
A_23_P375121	RALGAPA1	0.293296	0.00189014	Down	0	1	1
A_24_P930883	PDS5B	0.734498	0.04131	Up	0	1	1
A_23_P304000	MON2	0.880011	0.114045	Down	0	0	1
A_24_P299911	PASK	0.863203	0.00075027	Up	0	1	1
A_23_P203009	CUL5	0.708657	0.00152465	Up	0	1	1
A_23_P11859	HSD17B7	0.0270096	0.0984324	Down	1	0	1
A_23_P75330	HNRNPF	0.252318	0.841466	Down	0	0	1
A_23_P159169	AATK	0.848766	0.00347921	Up	0	1	1
A_24_P185986	UPRT	0.988103	0.0911102	Down	0	0	1
A_23_P365817	PPP1R14B	0.289982	0.00526428	Up	0	1	1
A_24_P917711	PRKAB2	0.552039	0.31872	Down	0	0	1
A_23_P384056	CCDC14	0.926454	0.000485856	Down	0	1	1
A_24_P99090	CKAP2	0.0138666	0.668386	Down	1	0	1
A_24_P233786	FAM129A	0.753996	0.0131186	Down	0	1	1
A_24_P328819	C4orf41	0.00155007	0.193397	Down	1	0	0
A_24_P160202	PANX2	0.867923	0.0277355	Down	0	1	0
A_24_P102821	PTAFR	0.0769529	0.000107384	Down	0	1	0
A_24_P303118	RPL34	0.716608	0.00241209	Down	0	1	1
A_32_P38345	IDS	0.582433	0.87571	Up	0	0	1
A_23_P102816	BX647159	0.900686	0.581421	Down	0	0	0
A_23_P39602	NCOA1	0.116813	0.00584324	Down	0	1	0
A_23_P19115	GSPT2	0.149728	0.0177051	Down	0	1	1
A_24_P336848	ACYP2	0.244365	0.0382576	Up	0	1	1
A_32_P86118	PM20D2	0.952018	0.00698864	Up	0	1	1
A_23_P58877	GOPC	0.932678	0.00875572	Down	0	1	1
A_23_P92786	RBM27	0.507479	0.946639	Down	0	0	1
A_23_P117274	MIPEP	0.353252	0.0540311	Down	0	0	1
A_32_P215714	RPL6	0.972619	0.00385534	Down	0	1	1
A_23_P6589	PMS2CL	0.565194	0.000874812	Up	0	1	0
A_24_P288685	IL13RA1	0.0347776	0.000278861	Down	1	1	1
A_24_P263682	QSOX2	0.0498893	0.303256	Down	1	0	1
A_23_P52219	ERLIN1	0.550553	0.925955	Down	0	0	1
A_23_P5586	MPHOSPH10	0.327575	0.000396679	Down	0	1	1
A_24_P54390	RASGRP3	0.804149	0.00164341	Down	0	1	0
A_23_P101615	ZNF565	0.0866632	0.00164104	Down	0	1	1
A_23_P63319	SOAT1	0.41855	0.013826	Down	0	1	1
A_24_P157424	NCBP2	0.767553	0.0753906	Down	0	0	1
A_23_P430785	FRS2	0.0741095	0.733986	Down	0	0	1
A_23_P202988	AASDHPPT	0.844386	0.0234586	Down	0	1	1
A_23_P8281	IFNGR1	0.951785	0.0015295	Down	0	1	1
A_23_P91930	QTRTD1	0.980582	0.69391	Down	0	0	1
A_24_P214625	PPA2	0.536786	0.00112837	Down	0	1	1
A_24_P203710	FUBP3	0.812619	0.00636842	Up	0	1	1
A_24_P203678	ACAT1	0.000294828	0.0088823	Down	1	1	1
A_23_P406889	PLDN	0.280275	0.0275458	Down	0	1	0
A_23_P99465	UFM1	0.784803	6.5e-05	Up	0	1	1
A_24_P249824	DYRK2	0.908784	0.393097	Down	0	0	1
A_23_P157352	MRPS33	0.75766	0.000482001	Up	0	1	1
A_23_P421563	LSM3	0.753996	0.00135325	Down	0	1	1
A_23_P71821	PBX3	0.0243322	0.389637	Down	1	0	1
A_23_P131676	CXCR7	0.2035	0.00591223	Up	0	1	0
A_24_P926543	C11orf82	0.570952	0.104261	Down	0	0	0
A_23_P100517	TMEM170A	0.956073	0.0274971	Up	0	1	1
A_24_P521409	RPS6KB1	0.745033	0.998132	Down	0	0	1
A_24_P142743	CNN2	0.392621	6.96e-05	Down	0	1	1
A_23_P115534	KIAA0319L	0.01994	3.99e-05	Down	1	1	1
A_23_P22735	BEX2	0.744123	0.000787752	Up	0	1	1
A_32_P97489	YWHAZ	0.810201	0.0978531	Up	0	0	1
A_23_P128641	USPL1	0.702216	0.0116386	Down	0	1	1
A_24_P295791	DGAT2	0.825569	0.00107356	Up	0	1	1
A_23_P33723	CD163	0.507099	0.0834074	Down	0	0	0
A_23_P212792	CEP135	0.968772	0.0596406	Down	0	0	1
A_23_P106835	BBS2	0.436113	0.000673308	Down	0	1	1
A_24_P208567	IL18R1	0.95071	8.14e-05	Down	0	1	0
A_23_P385063	DNAJB6	0.870349	0.142843	Up	0	0	1
A_23_P432385	H2AFJ	0.741997	0.548765	Up	0	0	1
CPID_593	PER1	0.863229	0.718373	Down	0	0	1
A_23_P30243	ERAP2	0.0576837	0.00370993	Down	0	1	0
A_24_P924915	ABHD2	0.0730889	0.00446016	Down	0	1	1
A_23_P171258	ABCB7	0.26277	0.00444196	Down	0	1	0
A_23_P138760	CLCF1	0.578468	0.570934	Up	0	0	1
A_23_P111811	ING3	0.959191	0.829268	Down	0	0	1
A_24_P290373	CXorf56	0.456239	0.623527	Down	0	0	0
A_23_P65996	CYLD	0.015771	0.665564	Down	1	0	1
A_24_P102512	CABIN1	0.334815	0.189353	Down	0	0	1
A_32_P81806	ZNF738	0.905736	0.0236206	Down	0	1	1
A_23_P207106	CHRNB1	0.471609	0.055486	Down	0	0	1
A_24_P928217	FAM134A	0.426438	0.0204205	Up	0	1	1
A_24_P347378	ALOX5AP	0.774521	7.8e-07	Down	0	1	0
A_23_P104804	ZBTB16	0.469969	0.015312	Down	0	1	0
A_23_P118774	KPNB1	1.11e-05	0.00198128	Down	1	1	1
A_24_P56894	CRLF3	0.570952	0.104149	Down	0	0	1
A_24_P659113	CCNYL1	0.208764	0.172329	Down	0	0	1
A_24_P372562	PTPMT1	0.720965	7.29e-06	Up	0	1	1
A_24_P116669	CANT1	0.972619	0.00457524	Up	0	1	1
A_24_P159312	SLC7A6	0.628905	0.693453	Down	0	0	1
A_24_P916656	CRCP	0.266135	0.297839	Down	0	0	1
A_24_P250176	MLX	0.812585	0.840524	Up	0	0	1
A_24_P615822	BMS1	0.610301	0.0184528	Down	0	1	1
A_32_P126311	SLC38A9	0.958538	0.00742506	Down	0	1	1
A_24_P103469	LST1	0.486173	0.181702	Up	0	0	0
A_23_P134814	THAP1	0.944949	0.0350668	Down	0	1	1
A_24_P95038	PPIA	0.45353	0.00159563	Up	0	1	1
A_23_P308305	TTC39C	0.932954	0.00071699	Down	0	1	0
A_24_P177025	CDC34	0.291273	0.0312815	Up	0	1	1
A_24_P175347	DERL1	0.696949	0.340118	Up	0	0	1
A_23_P354387	MYOF	0.109797	0.0587727	Down	0	0	1
A_23_P160920	PDZK1IP1	0.151637	0.0166732	Up	0	1	1
A_24_P125067	EEF2K	0.346392	0.0766281	Down	0	0	1
A_23_P150818	MBD6	0.659274	0.00177813	Up	0	1	1
A_24_P385585	TMEM18	0.326451	0.0348243	Down	0	1	1
A_23_P48771	C14orf159	0.918464	0.00262193	Down	0	1	0
A_23_P350045	REEP5	0.932173	0.329551	Down	0	0	1
A_24_P155016	TSGA14	0.149728	0.23284	Down	0	0	0
A_24_P308628	HEMK1	0.358867	0.00104926	Down	0	1	1
A_23_P143127	EML4	0.892784	0.126117	Down	0	0	1
A_24_P19544	STK39	0.970208	0.115991	Up	0	0	0
A_24_P138912	RFNG	0.119388	0.26593	Up	0	0	1
A_24_P82135	SECISBP2L	0.791887	0.96685	Down	0	0	1
A_23_P258944	DNAJB9	0.771037	0.00431539	Up	0	1	1
A_24_P220786	RGS12	0.765871	0.316629	Down	0	0	0
A_23_P99405	ZMYM2	0.959191	0.00430499	Down	0	1	1
A_23_P63010	LASS2	0.915385	0.216713	Up	0	0	0
A_32_P20697	CLK3	0.966628	0.276608	Up	0	0	0
A_24_P318073	RPUSD4	0.481912	0.0029346	Down	0	1	1
A_23_P216200	AGPAT5	0.562592	0.000290735	Down	0	1	1
A_24_P910854	TTC14	0.693534	0.201095	Down	0	0	1
A_23_P330999	MED23	0.970208	0.184955	Up	0	0	1
A_23_P58489	FASTKD3	0.753996	0.000203391	Up	0	1	1
A_23_P358438	FCRL3	0.503974	0.187228	Up	0	0	0
A_32_P80068	CLEC2D	0.690153	0.0729204	Down	0	0	1
A_24_P119283	ZC3H7A	3.55e-07	0.571907	Down	1	0	1
A_24_P252945	CXCR5	0.973108	0.103188	Down	0	0	0
A_23_P306500	KRAS	0.854578	0.581832	Down	0	0	1
A_23_P62335	TMLHE	0.840461	0.0897919	Down	0	0	1
A_32_P28685	SNRPA1	0.976045	0.000660724	Down	0	1	1
A_24_P669023	PCMTD1	0.970145	0.81193	Down	0	0	1
A_23_P87879	CD69	0.956733	0.000113568	Down	0	1	1
A_32_P96134	DPY19L1	0.938271	0.591151	Down	0	0	1
A_23_P3146	SPTLC2	0.516471	0.496643	Down	0	0	1
A_24_P291426	REV1	0.609749	0.353131	Down	0	0	1
A_23_P257198	NDUFS4	0.812585	0.000150145	Down	0	1	1
A_23_P153084	RALBP1	0.000175585	0.0297993	Down	1	1	1
A_32_P195478	RASGRP1	0.292329	0.162738	Down	0	0	1
A_23_P83736	ING2	0.872337	0.0191696	Down	0	1	1
A_23_P204048	DYRK2	0.697282	9.51e-05	Down	0	1	1
A_24_P107674	MAPK1IP1L	0.940444	0.0186744	Down	0	1	1
A_32_P77977	UTP11L	0.993009	0.00781483	Up	0	1	1
A_23_P46903	CAMK2G	0.661268	0.594769	Down	0	0	1
A_23_P403398	DKFZP586I1420	0.395593	0.232764	Down	0	0	0
A_23_P218111	SERPINA1	0.363095	0.0374038	Down	0	1	1
A_32_P10116	C9orf5	0.867923	0.393033	Down	0	0	0
A_24_P164718	MAR2	0.288263	0.53692	Up	0	0	0
A_32_P50924	HNRNPA1L2	0.826766	9.44e-05	Up	0	1	1
A_23_P99579	C14orf142	0.915287	0.005921	Down	0	1	0
A_23_P217611	ARMCX3	0.375358	0.16707	Down	0	0	0
A_23_P34093	G6PD	0.833685	0.038878	Up	0	1	1
A_23_P201432	ADSS	0.835636	0.0248533	Down	0	1	1
A_23_P75800	RAB3IL1	0.0402156	0.125353	Up	1	0	0
A_24_P273635	HELQ	0.969302	0.125741	Down	0	0	1
A_23_P124642	RASGRP1	0.918656	0.0584525	Down	0	0	1
A_32_P205553	RPL26L1	0.559037	0.191617	Up	0	0	1
A_24_P328504	SP140	6.12e-07	0.694758	Down	1	0	1
A_23_P65410	STRN3	0.874931	0.759516	Down	0	0	1
A_24_P63118	PDCD6IP	0.335545	0.381355	Down	0	0	1
A_23_P395703	RSF1	0.000351321	0.950607	Down	1	0	1
A_23_P114662	CRYZ	0.906566	5.54e-05	Down	0	1	1
A_32_P174874	DPY19L1	0.567338	0.41812	Down	0	0	1
A_24_P910262	STYX	0.99336	0.58071	Down	0	0	1
A_24_P6725	ANKRD36	0.0344711	0.146702	Down	1	0	1
A_23_P41424	SLC39A8	0.965185	0.0193275	Down	0	1	1
A_23_P308097	PPP2CB	0.0838472	0.106734	Down	0	0	1
A_23_P138631	SMC3	0.0347177	0.0175818	Down	1	1	1
A_23_P82588	C7orf55	0.0380272	0.0561724	Up	1	0	0
A_24_P590537	H3F3A	0.783969	0.00714978	Down	0	1	1
A_32_P160693	KCTD2	0.291785	0.817183	Down	0	0	1
A_23_P200728	FCGR3A	0.848226	0.0127328	Down	0	1	0
A_23_P208172	ZNF613	0.644765	0.00162945	Down	0	1	1
A_23_P39971	ERLEC1	0.91454	1.45e-05	Up	0	1	1
A_24_P128880	TBL1XR1	0.704202	0.0954928	Down	0	0	1
A_23_P255076	RWDD2A	0.874931	1.37e-05	Up	0	1	1
A_32_P123629	TTC39C	0.965814	0.000892016	Up	0	1	0
A_23_P31893	ST3GAL1	0.0278624	0.0624358	Down	1	0	1
A_24_P78862	SLC43A2	0.00711436	0.000109914	Down	1	1	1
A_23_P218731	CRYZL1	0.452635	0.0248533	Down	0	1	1
A_23_P386030	SNTB1	0.0186136	0.435401	Down	1	0	0
A_23_P112596	ADK	0.867923	2e-06	Up	0	1	1
A_23_P27894	SAFB2	0.987209	0.973697	Up	0	0	1
A_24_P243044	GSK3B	0.25927	0.707934	Down	0	0	1
A_24_P252020	TRIM41	0.725475	0.247606	Up	0	0	1
A_24_P393711	ABL1	0.0881799	0.293365	Down	0	0	1
A_23_P55990	NAPA	0.516824	0.249708	Down	0	0	1
A_32_P464568	GBA2	0.833751	0.277549	Up	0	0	1
A_23_P259344	CECR6	0.944906	0.00706231	Up	0	1	1
A_32_P145153	RPL31	0.946231	0.00130693	Down	0	1	1
A_23_P203376	MS4A6A	0.892784	0.00714598	Down	0	1	1
A_23_P429998	FOSB	0.578043	0.000112677	Up	0	1	1
A_23_P75741	UBE2L6	0.034586	0.0929058	Down	1	0	1
A_23_P356125	KIAA1468	0.947316	0.0289639	Down	0	1	1
A_23_P132138	C21orf58	0.625664	0.281883	Up	0	0	0
A_23_P155907	METAP1	0.776958	0.00020508	Down	0	1	1
A_23_P252449	HNRNPA0	0.577146	0.153994	Up	0	0	1
A_23_P24960	NARS2	0.670926	0.00321268	Down	0	1	1
A_23_P362191	C17orf44	0.546684	0.0954789	Up	0	0	0
A_32_P75122	FAM58A	0.030439	0.00381519	Up	1	1	1
A_23_P202496	NOC3L	0.909617	7.82e-05	Down	0	1	1
A_32_P223319	ESCO1	0.988477	0.0275458	Down	0	1	1
A_23_P3775	OGFOD1	0.179311	0.0066387	Down	0	1	1
A_24_P84428	CACYBP	0.708805	0.280925	Down	0	0	1
A_32_P162066	FAM105A	0.756775	0.0941295	Up	0	0	1
A_23_P133375	SLC25A46	0.948488	0.000324484	Down	0	1	1
A_24_P401981	LOC731275	0.950113	0.000117967	Down	0	1	0
A_23_P104464	ALOX5	0.976287	0.000659755	Up	0	1	0
A_23_P502350	RFX2	0.976255	0.0806643	Down	0	0	1
A_23_P310068	C12orf29	0.970208	0.000123295	Down	0	1	0
A_24_P400473	SLC25A44	0.609371	0.00318802	Up	0	1	1
A_24_P123658	RPL7L1	0.168117	0.00900405	Down	0	1	1
A_24_P135489	TSPAN14	0.200083	0.755863	Down	0	0	1
A_24_P313109	UFM1	0.648615	0.0583233	Up	0	0	1
A_23_P91859	TRANK1	0.183369	0.0205692	Down	0	1	0
A_23_P167767	CDC42SE2	0.550553	0.151632	Up	0	0	1
A_24_P938169	RPL22	0.286555	0.618372	Up	0	0	1
A_23_P205499	LRP10	0.610688	0.000366504	Down	0	1	1
A_23_P332374	ZNF175	0.856606	0.0575768	Up	0	0	1
A_23_P303260	STX7	0.565561	0.0238165	Down	0	1	1
A_23_P371794	CACNB3	0.546684	0.0851818	Up	0	0	1
A_32_P103837	FAM60A	0.942838	0.0558413	Down	0	0	1
A_32_P95949	ZDHHC17	0.267837	0.613703	Down	0	0	1
A_24_P409219	CCDC132	0.6489	0.00273553	Down	0	1	1
A_23_P256455	RPA3	0.837889	0.0096142	Up	0	1	0
A_24_P105564	PRKAB2	0.894377	0.00336991	Down	0	1	1
A_23_P56228	GMIP	0.784617	0.0960653	Up	0	0	1
A_23_P23114	PTP4A2	0.994491	0.967523	Up	0	0	1
A_23_P162199	PIP4K2C	0.799995	0.170603	Down	0	0	1
A_24_P148762	IL1RAP	0.703598	0.102157	Down	0	0	1
A_23_P163353	PIAS1	6.88e-06	0.0837464	Down	1	0	1
A_23_P144476	SPRY1	0.254521	0.175001	Down	0	0	1
A_32_P102062	FOXO3	0.158081	0.000401015	Down	0	1	1
A_23_P165548	HS1BP3	0.453946	0.110791	Down	0	0	1
A_23_P72961	PRPS1	0.447845	0.746561	Down	0	0	1
A_23_P8055	NRM	0.990855	0.543835	Up	0	0	1
A_23_P207371	G6PC	0.898597	0.894712	Up	0	0	1
A_32_P206401	QSOX2	0.791887	0.0397536	Down	0	1	1
A_23_P215421	WIPI2	0.735007	0.265926	Down	0	0	1
A_23_P93389	NUDT3	0.562592	0.592401	Up	0	0	1
A_24_P801264	HMGB1	0.105348	0.00987877	Down	0	1	1
A_23_P50504	FTL	0.443576	0.0470285	Down	0	1	1
A_23_P321160	ZNF594	0.934585	0.000513095	Down	0	1	1
A_24_P537188	PCMTD2	0.789416	0.000192329	Down	0	1	1
A_23_P67971	GALM	0.0196889	0.127907	Down	1	0	1
A_23_P202345	ADO	0.788168	0.0529179	Up	0	0	1
A_23_P106103	AKAP5	0.888691	0.341448	Down	0	0	1
A_23_P120002	SP110	0.0172688	0.155912	Down	1	0	0
A_24_P940576	KLHDC5	0.00121424	0.569902	Down	1	0	0
A_23_P31921	ASS1	0.150103	0.18435	Down	0	0	0
A_24_P925737	C1orf226	0.983689	0.0427916	Down	0	1	0
A_32_P83997	RTN3	0.886508	0.114289	Up	0	0	1
A_23_P119778	SLC39A10	0.770285	0.0544197	Down	0	0	1
A_24_P186346	ANAPC1	0.923166	0.0802578	Up	0	0	1
A_23_P89589	PER1	0.367501	0.0156566	Down	0	1	1
A_23_P361773	CCND3	0.794111	0.232568	Up	0	0	1
A_23_P134347	CPVL	0.0286995	0.0695335	Down	1	0	0
A_23_P109488	PIK3IP1	0.0551929	0.00478037	Down	0	1	1
A_23_P128541	TRAFD1	0.0309683	0.48387	Down	1	0	1
A_24_P272313	C2orf55	0.0155303	0.0440573	Down	1	1	0
A_24_P68019	ZNF551	0.0742687	0.0596406	Down	0	0	1
A_24_P345123	MPZL1	0.292702	0.0548989	Down	0	0	1
A_23_P381203	KIAA0556	0.676735	0.77943	Down	0	0	1
A_24_P140057	DPP10	0.91177	0.641373	Up	0	0	0
A_23_P93912	ANKIB1	2.92e-05	0.986425	Down	1	0	1
A_24_P123833	SEMA3E	0.639677	0.352567	Up	0	0	1
A_24_P391431	TAF9B	0.856228	0.00170079	Down	0	1	1
A_23_P370479	POFUT1	0.926376	0.22062	Up	0	0	1
A_24_P76995	ZDHHC17	0.0924054	0.786785	Down	0	0	1
A_23_P125668	SLC25A43	0.30774	0.00111435	Down	0	1	0
A_23_P385911	KIAA1712	0.571197	0.405201	Down	0	0	0
A_23_P103522	SELL	0.964542	0.00528347	Down	0	1	0
A_23_P10815	PUM1	0.323594	0.4793	Down	0	0	1
A_24_P282416	ABL1	0.119388	0.330276	Down	0	0	1
A_23_P143885	ARHGEF3	0.019818	0.000184316	Down	1	1	0
A_24_P67142	SON	0.556742	0.0112143	Down	0	1	1
A_23_P35796	PPP2R5B	0.675027	0.448878	Up	0	0	1
A_23_P155162	PANX2	0.0296651	7.52e-06	Down	1	1	0
A_24_P237389	EIF1AX	0.937565	0.00714598	Down	0	1	1
A_24_P919850	BDKRB1	0.518166	0.396927	Up	0	0	0
A_23_P148015	AXIN2	0.938306	0.0250367	Up	0	1	1
A_23_P207131	MAP3K3	0.970208	0.00331861	Up	0	1	1
CPID_569	CRY1	0.765871	0.0801757	Up	0	0	1
A_24_P23067	UBOX5	0.0402156	0.448329	Down	1	0	1
A_24_P237566	C8orf37	0.560369	0.305573	Down	0	0	0
A_24_P382661	ETS2	0.306979	0.00360454	Down	0	1	1
A_24_P301557	LPIN2	0.170763	0.299269	Down	0	0	1
A_23_P202510	ASB13	0.657968	0.620726	Up	0	0	1
A_23_P318284	GPD1L	0.407468	0.00734322	Down	0	1	1
A_24_P260346	ADH5	0.485056	0.000972782	Down	0	1	1
A_23_P42096	MAP3K4	0.63407	0.623635	Down	0	0	1
A_23_P102890	MRPS6	0.343624	0.384713	Up	0	0	1
A_23_P426989	SH3BP5L	0.526995	0.0110039	Up	0	1	1
A_32_P134846	C9orf123	0.9339	0.000968514	Up	0	1	0
A_24_P287189	TOLLIP	0.791887	0.553514	Down	0	0	1
A_23_P54758	GDE1	0.994468	0.00483887	Up	0	1	1
A_24_P91140	RPL23A	0.893483	0.0049865	Down	0	1	1
A_23_P73548	GRIPAP1	0.964755	0.947213	Up	0	0	1
A_24_P190345	ZNF615	0.552039	0.000189321	Down	0	1	1
A_32_P186474	RACGAP1	0.494155	0.454054	Up	0	0	1
A_23_P45756	SYF2	0.959191	0.00074209	Down	0	1	1
A_23_P134584	XRCC2	0.421803	0.407517	Up	0	0	1
A_24_P416837	NRSN2	0.94992	0.126433	Down	0	0	1
A_24_P222684	TROVE2	0.0348191	0.65964	Down	1	0	1
A_24_P77870	MUTED	0.503389	0.030853	Down	0	1	0
A_23_P215517	KLHL7	0.84575	0.00028267	Up	0	1	1
A_24_P12435	NCOA7	0.266135	0.000324262	Down	0	1	1
A_24_P295745	HSPA8	0.00329294	0.0268275	Down	1	1	1
A_23_P215341	FKBP14	0.479748	0.00252234	Down	0	1	1
A_24_P721898	BTBD7	0.920732	0.650281	Down	0	0	1
A_23_P103442	MEAF6	0.940444	0.000343255	Up	0	1	1
A_24_P277875	CHN2	0.209424	0.432198	Down	0	0	0
A_23_P141866	ZNF134	0.0219612	0.0285028	Down	1	1	1
A_32_P217870	CEP192	0.176098	0.845139	Down	0	0	1
A_23_P106194	FOS	0.711092	0.00380362	Down	0	1	1
A_23_P213255	SMARCAD1	0.915385	0.00200411	Down	0	1	1
A_32_P34516	XKR6	0.480246	0.781576	Up	0	0	1
A_23_P404091	GRPEL2	0.998346	0.00204008	Down	0	1	1
A_23_P103864	TTC13	0.257491	0.00176186	Up	0	1	1
A_24_P629883	AY358241	0.994491	0.014295	Up	0	1	0
A_24_P278684	DFFB	0.341883	0.0509467	Down	0	0	1
A_24_P371053	ORMDL1	0.896144	0.00401012	Down	0	1	1
A_24_P140621	CCNJL	0.96967	0.00236397	Up	0	1	1
A_24_P121171	HINFP	0.833751	0.0777348	Up	0	0	1
A_23_P143484	PIGP	0.967186	0.0205051	Down	0	1	1
CPID_582	TIMELESS	0.977245	0.712689	Up	0	0	1
CPID_189	RORA	0.00360616	0.0997835	Down	1	0	0
A_24_P187706	GOLGA4	0.108395	0.228011	Down	0	0	1
A_24_P942163	FAM63A	0.158081	3.4e-05	Up	0	1	1
A_23_P63017	LGALS8	0.953271	0.0457932	Down	0	1	1
A_23_P204016	CACNB3	0.52686	0.0632616	Up	0	0	1
A_24_P16702	C7orf41	0.715656	0.158698	Down	0	0	0
A_23_P398044	CCDC97	0.752047	0.153994	Down	0	0	1
A_23_P19219	ASF1A	0.846146	0.0463841	Up	0	1	1
A_23_P250413	PARVG	0.453946	0.123788	Down	0	0	0
A_23_P132444	TCEA1	0.994491	0.0152144	Down	0	1	1
A_23_P217804	CDC2L1	0.0573201	0.780036	Down	0	0	0
A_23_P330895	NFKBIB	0.425785	0.00364518	Down	0	1	1
A_23_P121602	SAP30	0.874931	0.242818	Up	0	0	1
A_24_P266035	DIMT1L	0.871499	1.82e-06	Up	0	1	0
A_24_P376556	CYCS	0.892784	0.00028267	Down	0	1	1
A_24_P173325	UBA52	0.989638	0.206584	Up	0	0	1
CPID_571	CRY1	0.690245	0.0598189	Up	0	0	1
A_23_P152420	KIAA0182	0.38705	0.152287	Down	0	0	0
A_24_P941131	MIER2	0.938306	0.587464	Up	0	0	1
A_23_P54900	UBN1	0.447599	3.65e-05	Down	0	1	1
A_23_P74950	RCC2	0.665618	0.000588422	Up	0	1	1
A_23_P25644	PCID2	0.918656	0.00032806	Up	0	1	1
A_23_P18806	YIPF5	0.00468685	0.0424943	Down	1	1	1
A_24_P231004	TIMELESS	0.403882	0.098548	Down	0	0	1
A_23_P110811	COX7C	0.761449	0.00291164	Down	0	1	1
A_23_P77965	HEATR6	0.0415144	0.0451984	Down	1	1	1
A_23_P404821	KIAA1147	0.644765	0.0201518	Down	0	1	0
A_23_P28530	MFSD6	0.0433924	0.889225	Down	1	0	1
A_24_P280901	RPL21	0.774251	6.06e-05	Down	0	1	1
A_24_P364335	CLEC2D	0.779087	0.00388334	Down	0	1	1
A_24_P117528	PRPS2	0.775147	0.015438	Down	0	1	0
A_24_P402495	USP33	0.447845	0.77057	Down	0	0	1
A_24_P194199	JPH2	0.980805	0.0960617	Down	0	0	1
A_23_P159688	TBC1D25	0.731843	0.558602	Down	0	0	1
A_23_P170541	KCNH6	0.355878	0.0190117	Up	0	1	0
A_23_P56630	STAT1	0.121902	0.396967	Down	0	0	1
A_23_P209394	CFLAR	0.678064	5.17e-05	Down	0	1	1
A_23_P305677	UBE2D2	0.988477	0.431608	Up	0	0	1
A_24_P17722	TBC1D9B	0.700034	0.279579	Down	0	0	1
A_23_P119377	CYTH2	0.628559	0.411387	Up	0	0	1
A_24_P396557	CCDC76	0.331503	0.021598	Down	0	1	0
A_23_P41380	ABCE1	0.795071	1.12e-05	Down	0	1	1
A_23_P79289	COBLL1	0.0219612	0.69305	Down	1	0	1
A_23_P71752	ZFAND5	0.562592	0.218917	Down	0	0	1
A_24_P34100	SLC25A43	0.639677	0.385694	Down	0	0	0
A_23_P364428	CAMK1G	0.932678	0.00048802	Down	0	1	0
A_23_P216970	TRAF1	0.989749	0.117456	Up	0	0	1
A_23_P72550	ULK1	0.690245	0.00908841	Up	0	1	1
A_24_P924462	PRKCZ	0.963091	0.39565	Down	0	0	1
A_23_P116999	GPN3	0.943789	0.000136541	Down	0	1	1
A_23_P11915	GDAP2	0.625664	0.197472	Up	0	0	1
A_24_P932319	CLASP2	0.720584	0.183872	Down	0	0	1
A_23_P85392	RER1	0.694865	0.488821	Up	0	0	1
A_24_P188218	MYL4	0.0746948	0.027099	Up	0	1	0
A_23_P26878	NDEL1	0.420009	0.000643215	Down	0	1	1
A_24_P276531	SNIP1	0.168117	0.723362	Down	0	0	1
A_23_P357860	SEC62	0.929579	0.30483	Up	0	0	1
A_23_P27571	MCOLN1	0.989638	0.274598	Up	0	0	1
A_24_P196428	RNF175	0.358084	0.0735467	Down	0	0	0
A_23_P110961	BRP44L	0.676602	0.19985	Up	0	0	0
A_32_P820503	FTH1	0.716573	0.0394389	Down	0	1	1
A_23_P102278	DPP10	0.153302	0.0105212	Down	0	1	0
A_23_P97835	TDRD1	0.254475	0.262777	Down	0	0	0
A_24_P93624	RAB3IP	0.932678	0.701541	Down	0	0	1
A_23_P215024	LRRC1	0.57562	0.0929009	Down	0	0	1
A_23_P133315	ZNF131	0.961252	0.0214084	Up	0	1	1
A_24_P573978	CYCS	0.719026	0.0969713	Up	0	0	1
A_23_P76538	TESC	0.130471	0.252545	Up	0	0	1
A_23_P73593	MSN	0.235663	0.0216336	Down	0	1	1
A_23_P36665	CRY1	0.657968	0.0834074	Down	0	0	1
A_24_P263672	BMS1	0.908263	0.000475795	Up	0	1	1
A_23_P169879	SLC25A26	0.946231	0.0358452	Down	0	1	0
A_23_P130553	SHKBP1	0.881176	0.101476	Up	0	0	1
A_23_P141505	CLEC10A	0.251	0.00269204	Down	0	1	0
A_24_P381555	SAP18	0.957804	0.201438	Down	0	0	1
A_23_P22957	SH3GLB1	0.967186	0.0152442	Up	0	1	1
A_24_P195253	HSPA14	0.18706	0.602457	Down	0	0	1
A_23_P250196	MTDH	0.2328	0.055574	Down	0	0	1
A_24_P307827	WHAMM	0.865715	0.0434564	Down	0	1	1
A_23_P428819	AKIRIN2	0.947195	0.000692694	Up	0	1	1
A_23_P117494	MTHFD1	0.124582	0.0103212	Down	0	1	1
A_23_P156748	ANKS1A	0.179311	0.0289639	Down	0	1	1
A_24_P195125	SPDYE7P	0.988477	0.0174907	Up	0	1	0
A_23_P54834	NIP7	0.245713	0.000643215	Down	0	1	1
A_24_P146670	SLK	0.932173	0.0279788	Down	0	1	1
A_23_P397937	SAMD3	0.430745	0.0323845	Down	0	1	0
A_24_P169544	ZNF17	0.720949	0.000234335	Down	0	1	1
A_24_P338187	HNRNPH3	0.711572	0.149091	Down	0	0	1
A_23_P360209	SH3KBP1	0.155945	0.00791942	Down	0	1	1
A_23_P5611	RIF1	0.40985	0.0606913	Down	0	0	1
A_23_P162846	LAMP1	0.674186	0.0190003	Down	0	1	1
A_24_P176484	ZCCHC14	0.846146	0.66134	Down	0	0	1
A_23_P209962	SMC6	0.643886	0.00380238	Down	0	1	1
A_23_P44154	CD96	0.971152	0.275128	Down	0	0	0
A_23_P80940	PPAT	0.208764	0.396424	Down	0	0	1
A_24_P389994	NADK	0.0991181	0.00388332	Down	0	1	1
A_24_P417474	TIA1	0.529245	0.874585	Up	0	0	1
A_23_P318800	SSTR2	0.552039	0.119701	Up	0	0	0
A_23_P157022	ZNF786	0.662704	0.00082309	Up	0	1	1
A_23_P168188	SYTL3	0.995922	0.000485856	Down	0	1	1
A_23_P11372	HPRT1	0.989749	0.0510633	Down	0	0	0
A_24_P305623	TMEM50B	0.497954	8.66e-05	Down	0	1	1
A_23_P422204	PPPDE1	0.239379	0.896977	Down	0	0	0
A_24_P926760	NKTR	0.779364	0.214986	Up	0	0	1
A_23_P109508	NCF4	0.818954	8.05e-05	Up	0	1	1
A_23_P7697	SNX2	0.892784	4.91e-05	Down	0	1	1
A_24_P688133	PPM1A	0.963352	0.334004	Down	0	0	0
A_23_P373545	COPE	0.0924624	0.00544499	Down	0	1	1
A_23_P363163	CGGBP1	0.972619	0.0447126	Down	0	1	1
A_24_P392265	EXOC5	2.34e-07	0.162365	Down	1	0	1
A_32_P170481	LOC100240735	0.967483	0.00421203	Down	0	1	1
A_24_P119259	BLZF1	0.375755	0.827347	Down	0	0	1
A_23_P385851	MBNL3	0.40443	0.311206	Up	0	0	0
A_23_P79441	C2orf42	0.900686	0.92453	Down	0	0	0
A_32_P110751	EIF4A2	0.619766	0.0309229	Down	0	1	1
A_23_P110712	DUSP1	0.952018	0.00215243	Up	0	1	1
A_24_P360078	LRBA	0.334815	0.1227	Down	0	0	1
A_23_P318464	EPHA8	0.994491	0.761021	Down	0	0	0
A_24_P941845	GMPPB	0.946231	0.0456463	Up	0	1	1
A_24_P300379	PI16	0.588021	0.0431764	Up	0	1	0
A_32_P79366	HABP4	0.0597865	0.00030774	Down	0	1	1
A_23_P136317	RCOR3	0.744123	0.194996	Up	0	0	1
A_23_P77401	CPPED1	0.281576	0.000575029	Down	0	1	1
A_23_P361381	DMC1	0.950805	0.672927	Up	0	0	1
A_23_P20804	C9orf25	0.537115	0.107447	Up	0	0	0
A_23_P44734	USP38	0.995239	0.296266	Down	0	0	1
A_32_P85813	RAP1GDS1	0.35787	0.051742	Down	0	0	1
A_23_P376557	MMP25	0.458333	1.35e-05	Up	0	1	0
A_23_P7684	CCNJL	0.58803	0.000384294	Up	0	1	1
A_32_P208120	CAMK1D	0.344064	0.025353	Down	0	1	1
CPID_578	TIMELESS	0.754885	0.41943	Down	0	0	1
A_23_P344988	ICK	0.981232	0.0535913	Down	0	0	1
A_32_P187327	TUBB2C	0.43752	0.394404	Up	0	0	0
A_23_P206272	C16orf57	0.788168	0.520977	Down	0	0	0
A_24_P937546	CMTM7	0.857709	0.216786	Up	0	0	1
A_23_P424269	C9orf102	0.0193857	0.769143	Down	1	0	0
A_23_P31896	ST3GAL1	0.00571568	0.0213259	Down	1	1	1
A_24_P124992	PSMA4	0.609306	0.00192078	Down	0	1	1
A_24_P247608	PCMT1	0.848355	0.0355773	Down	0	1	1
A_24_P251053	EFHD2	0.446155	0.00353033	Down	0	1	1
A_23_P502312	CD97	0.634875	0.00210355	Down	0	1	1
A_23_P385084	LUZP1	0.639677	0.399604	Down	0	0	1
A_23_P92320	NUP54	0.791887	0.00608652	Down	0	1	1
A_23_P412562	C1orf162	0.173595	0.308925	Down	0	0	0
A_24_P830667	RPL21	0.910755	0.000946358	Down	0	1	1
A_24_P218688	ALDH3B1	0.187449	0.289397	Down	0	0	1
A_23_P37415	SECISBP2L	0.255414	0.635834	Down	0	0	1
A_24_P382591	C20orf30	0.993526	0.00238762	Down	0	1	0
A_23_P12336	PRMT6	0.890827	7.82e-05	Up	0	1	0
A_23_P391894	C3orf75	0.799961	0.256119	Down	0	0	0
A_23_P60816	PDCD6IP	0.984423	0.707314	Down	0	0	1
A_23_P83556	CRK	0.133765	0.780926	Down	0	0	1
A_32_P315770	RBMS1	0.898597	0.0808889	Down	0	0	1
A_32_P194821	RPL21	0.957597	0.000292698	Down	0	1	1
A_23_P34597	CDA	0.944906	0.000123813	Up	0	1	1
A_23_P7221	RPL34	0.651999	0.00349569	Up	0	1	1
A_23_P118690	ZNF207	0.0552515	0.108769	Down	0	0	1
A_23_P3355	POLG	0.61207	0.319824	Up	0	0	1
A_23_P132499	IL17RD	0.0905023	0.103188	Down	0	0	0
A_23_P371215	ICOS	0.941298	0.00105941	Up	0	1	0
A_23_P151746	ISCA2	0.298828	0.0472879	Up	0	1	1
A_23_P121825	C5orf44	0.948554	0.00590927	Down	0	1	0
A_24_P418418	RPS17	0.976255	0.00087266	Down	0	1	1
A_24_P92640	LOC100128288	0.777323	0.0822894	Down	0	0	0
A_23_P154330	TXNDC9	0.928079	0.000135091	Down	0	1	1
A_23_P214666	RPS18	0.611753	0.00904598	Up	0	1	0
A_23_P58482	MGAT1	0.690245	0.246106	Down	0	0	1
A_24_P179615	GRINA	0.865908	0.300136	Up	0	0	1
A_23_P153098	HDHD2	0.904128	0.0011339	Up	0	1	1
A_24_P333663	MAPK6	0.691353	0.623746	Down	0	0	1
A_24_P390668	FMNL1	0.588021	0.0809971	Up	0	0	1
A_23_P15182	ARL2BP	0.511307	0.210313	Up	0	0	1
A_24_P781615	LOC90586	0.356384	0.0463201	Down	0	1	0
A_23_P84629	RFNG	0.779087	0.874297	Down	0	0	1
A_24_P274270	STAT1	0.223643	0.13847	Down	0	0	1
A_24_P146211	HIST1H2BD	0.779087	4.44e-06	Up	0	1	1
A_23_P27947	PDCD2L	0.463772	0.0300884	Up	0	1	1
A_24_P169896	TIMP2	0.296185	0.0291089	Down	0	1	1
A_32_P194095	TMEM111	0.290748	0.428664	Up	0	0	0
A_24_P274831	GIMAP7	0.44316	5.26e-05	Down	0	1	0
A_23_P202860	CYP2R1	0.58747	0.000636345	Up	0	1	1
A_23_P31873	RAB11FIP1	0.385086	0.000621942	Down	0	1	1
A_23_P91900	SMC4	0.972415	0.533121	Down	0	0	1
A_24_P50875	ANKHD1	0.6162	0.393033	Down	0	0	1
A_23_P358957	CAMKK2	0.85501	7.92e-05	Up	0	1	1
A_32_P168464	CASK	0.994491	0.0620199	Down	0	0	1
A_23_P371682	GPC6	0.103559	0.045555	Down	0	1	1
A_24_P53051	LACTB	0.494053	0.373344	Down	0	0	1
A_23_P386905	UBXN6	0.691353	0.183425	Up	0	0	1
A_23_P204277	H2AFJ	0.258384	0.222712	Up	0	0	1
A_23_P53363	XRCC6BP1	0.631859	0.00335386	Up	0	1	1
A_23_P18196	RFC4	0.327626	0.0029936	Up	0	1	1
A_23_P60028	TCEB1	0.73594	0.047338	Up	0	1	1
A_23_P106761	CORO1A	0.317978	0.00549738	Down	0	1	1
A_23_P133457	IRX1	0.774521	0.268239	Down	0	0	1
A_23_P252700	UNC50	0.957597	0.0290083	Up	0	1	1
A_24_P150665	RUNDC2A	0.0632593	0.0732156	Down	0	0	0
A_23_P44139	PRIM2	0.391234	0.22062	Up	0	0	1
A_23_P20932	PDHB	0.438136	0.0167422	Down	0	1	1
A_24_P98975	ANKRD13A	0.837889	0.0508751	Up	0	0	1
A_23_P90021	ZNF557	0.784803	0.000948146	Down	0	1	1
A_23_P62932	ATP1B1	0.944906	0.0715074	Down	0	0	1
A_23_P112478	NUDT2	0.757995	0.0241467	Up	0	1	1
A_23_P2294	HELB	0.704202	0.947213	Down	0	0	1
A_24_P388252	PPP3R1	0.83912	0.632976	Up	0	0	1
A_24_P526177	TDG	0.363095	0.848768	Down	0	0	1
A_24_P207150	UBE3A	0.456239	0.000420966	Down	0	1	1
A_23_P45934	SRP9	0.928079	0.00892584	Down	0	1	1
A_23_P310560	NUDT16	0.728629	0.357692	Down	0	0	1
A_23_P162106	MRPL48	0.81563	0.0011339	Down	0	1	1
A_23_P152055	EFTUD1	0.503974	0.0843317	Down	0	0	1
A_23_P133728	GCM1	0.76634	0.121462	Up	0	0	0
A_32_P20691	CLK3	0.145914	0.321565	Up	0	0	0
A_23_P44083	GFPT1	0.203813	0.672979	Down	0	0	1
A_23_P142205	LILRA2	0.358867	0.00192078	Down	0	1	0
A_24_P99526	TTYH2	0.291933	0.523191	Down	0	0	1
A_23_P90014	GPR108	0.802816	0.181702	Up	0	0	1
A_23_P394304	PDZK1IP1	0.44381	0.0217997	Up	0	1	1
A_24_P299663	ZNF238	0.79559	0.903857	Down	0	0	0
A_32_P27706	AGPS	0.853274	0.00143586	Up	0	1	1
A_23_P413815	VKORC1L1	0.696698	0.31892	Down	0	0	1
A_23_P59022	TRERF1	0.809004	0.379015	Up	0	0	1
A_24_P190379	ZNF302	0.64185	0.000825177	Down	0	1	1
A_23_P13663	FAM60A	0.93794	0.000280036	Up	0	1	1
A_23_P141126	GALK1	0.976255	0.622923	Up	0	0	1
A_24_P32672	MRPL11	0.582135	0.122077	Up	0	0	1
A_23_P97161	TTF2	0.00978245	9.01e-05	Down	1	1	1
A_24_P54670	SLC6A6	0.589654	5.81e-06	Down	0	1	1
A_32_P103309	ALG10B	0.00676616	0.000318719	Down	1	1	1
A_32_P72940	RPL35	0.754885	0.0161098	Up	0	1	1
A_23_P423315	RBM17	0.072966	0.934341	Down	0	0	1
A_24_P259922	LANCL1	0.741742	0.00464255	Down	0	1	1
A_32_P41035	LOC100133161	0.158081	0.000234335	Up	0	1	0
A_23_P149912	MLLT10	0.00139594	0.501759	Down	1	0	1
A_24_P929724	IBTK	0.0402156	0.13808	Down	1	0	1
A_32_P482979	RBM12B	0.975294	0.0277547	Down	0	1	1
A_23_P385322	STAMBPL1	0.996074	0.000990904	Down	0	1	1
A_24_P754817	EFTUD1	0.0648199	0.0493771	Down	0	1	1
A_32_P196854	FAM76A	0.556742	0.0207211	Down	0	1	1
A_32_P198923	YWHAZ	0.972619	0.0611202	Up	0	0	1
A_23_P250347	CAMK4	0.597791	0.109483	Down	0	0	0
A_32_P56713	BCR	0.572126	0.267816	Up	0	0	1
A_24_P73370	ULK1	0.643	0.00893049	Up	0	1	1
A_23_P42746	NCF1	0.440368	0.000817247	Down	0	1	1
A_23_P112673	ZWILCH	0.402774	0.0444992	Down	0	1	1
A_23_P50897	MKI67IP	0.988103	9.96e-06	Down	0	1	0
A_23_P250767	MTMR12	0.632282	0.882341	Down	0	0	1
A_24_P157342	C3orf10	0.797983	0.0330959	Up	0	1	0
A_24_P256668	ZC3H7A	0.733643	0.417455	Down	0	0	1
A_23_P312863	TUBB2C	0.80973	0.735274	Up	0	0	0
A_24_P320572	ZNF451	0.622263	0.438008	Down	0	0	1
A_23_P69637	OTUD4	0.816377	0.386157	Down	0	0	1
A_23_P141738	SS18	0.267837	0.0230648	Down	0	1	1
A_23_P329971	PPAPDC1B	0.973519	0.773107	Down	0	0	1
A_24_P362394	VPS45	0.00405785	0.120524	Down	1	0	1
A_23_P140427	EVL	0.704202	0.000326055	Up	0	1	1
A_23_P12272	PPP1R8	0.761449	0.285117	Up	0	0	1
A_24_P10890	PRR5	0.849699	0.196523	Up	0	0	0
A_23_P158349	RABL3	0.296138	0.246121	Down	0	0	1
A_23_P138194	NCF2	0.847832	0.0615306	Up	0	0	1
A_23_P20882	ATP6V1G1	0.865908	0.0125893	Down	0	1	1
A_23_P158461	RFC1	0.935128	0.240785	Up	0	0	1
A_23_P717	TMEM206	0.92355	0.00370993	Down	0	1	1
A_23_P91512	CLDN14	0.948554	0.349725	Up	0	0	0
A_23_P204550	SCYL2	0.978863	0.896977	Down	0	0	1
A_24_P935782	ZNF121	0.374512	0.0845208	Down	0	0	1
A_24_P935889	ACOX1	0.977658	0.00300024	Up	0	1	1
A_23_P314191	ZDHHC17	0.997217	0.0430504	Down	0	1	1
A_23_P156784	MCHR2	0.943206	0.0854275	Up	0	0	0
A_24_P336705	RABGGTB	0.458759	0.000311936	Up	0	1	1
A_32_P36217	SON	0.125072	0.141876	Down	0	0	1
A_23_P78771	NUCB1	0.407271	0.219722	Down	0	0	1
A_23_P51767	CD1C	0.516455	0.341998	Up	0	0	0
A_23_P216489	GNE	0.0503756	0.000414192	Down	0	1	1
A_23_P50368	OSCAR	0.578043	1.15e-05	Up	0	1	1
A_23_P13007	FRMD8	0.613469	0.33392	Down	0	0	1
A_23_P142146	RPL18	0.599034	0.0745891	Up	0	0	1
A_24_P383509	CCDC25	0.330106	0.00118546	Up	0	1	1
A_24_P191847	PTCD2	0.230025	0.562794	Down	0	0	1
A_23_P435501	SERINC3	0.0518684	0.00210886	Down	0	1	1
A_23_P203463	TAF10	0.655875	0.334092	Up	0	0	1
A_23_P150255	RBM14	0.948554	0.362044	Up	0	0	1
A_23_P48056	CKAP4	0.82898	0.00337728	Down	0	1	0
A_23_P54170	MED6	0.737168	0.0978699	Up	0	0	1
A_24_P100664	MKKS	0.792735	0.0291687	Down	0	1	1
A_23_P24365	ANKRD49	0.92196	0.00409977	Down	0	1	1
A_23_P31135	ACAT2	0.779087	0.000234335	Up	0	1	1
A_24_P16950	ZNF160	0.155847	0.287024	Down	0	0	1
A_23_P65129	SPRYD3	0.810831	0.272101	Up	0	0	1
A_23_P389676	EXOC3	0.230116	0.406275	Up	0	0	0
A_24_P928361	NIN	0.567338	0.23284	Down	0	0	0
A_24_P85026	ZCCHC7	0.000372819	0.758209	Down	1	0	1
A_23_P79836	SERINC3	0.728772	0.00170787	Up	0	1	1
A_24_P239578	SLA	0.000125496	2.21e-05	Down	1	1	0
A_24_P261383	TAF1D	0.991551	0.0536746	Down	0	0	1
A_23_P160809	COG2	0.428254	0.00377346	Down	0	1	1
A_23_P42368	VTA1	0.486173	0.0363777	Down	0	1	1
A_24_P248982	ERGIC1	0.460475	0.00977438	Down	0	1	1
A_24_P343929	OAS2	1.31e-06	0.623928	Down	1	0	1
A_24_P388536	WDR82	0.000616098	0.662605	Down	1	0	1
A_32_P28872	TALDO1	0.486124	0.000324585	Up	0	1	1
A_24_P350124	RNF213	0.0502274	0.0867759	Down	0	0	1
A_23_P48384	VPS36	0.30774	0.209613	Down	0	0	1
A_23_P94174	MRPL15	0.703357	3.72e-06	Up	0	1	1
A_23_P63896	FAS	0.609053	0.0259505	Down	0	1	1
A_24_P911827	FAM175A	0.455744	0.759345	Down	0	0	1
A_24_P46953	SGK3	0.945985	0.0156414	Down	0	1	0
A_23_P111753	MRPL32	0.904992	0.000107384	Down	0	1	1
A_23_P208240	ZNF160	0.48512	0.661074	Down	0	0	1
A_24_P303989	BMI1	0.201115	0.437753	Down	0	0	1
A_23_P22672	ALG13	0.734105	0.101139	Up	0	0	1
A_23_P7253	LARP1B	0.799961	0.340744	Down	0	0	1
A_23_P218405	GPS2	0.616769	0.53692	Up	0	0	1
A_23_P148798	UCHL5	0.84386	0.00184209	Up	0	1	1
A_23_P501515	HNRNPU	0.130471	0.00361486	Down	0	1	1
A_23_P390734	FGFR1OP2	0.985985	0.00638602	Down	0	1	1
A_32_P11451	NMD3	0.92196	0.000165571	Down	0	1	1
A_23_P141180	TOM1L2	0.195201	0.789036	Up	0	0	1
A_24_P41021	FBXO33	0.715656	0.287704	Down	0	0	1
A_23_P256342	SNX13	0.921854	0.573417	Down	0	0	1
A_24_P808522	RPS14	0.932678	0.149474	Down	0	0	1
A_23_P256716	SMARCA5	0.0351903	0.312682	Down	1	0	1
A_23_P25073	MRPS35	0.794776	0.00740486	Up	0	1	1
A_23_P324490	KIAA0355	0.928079	0.663759	Up	0	0	1
A_23_P56195	UBA52	0.981232	0.0917944	Up	0	0	1
A_24_P237278	NIPSNAP1	0.0273078	0.36882	Down	1	0	1
A_23_P111321	ARG1	0.0336333	0.000446688	Up	1	1	1
A_23_P252106	RIPK2	0.601374	0.251061	Down	0	0	1
A_23_P6714	SENP7	0.988477	0.38208	Down	0	0	1
A_23_P96008	MALT1	0.730455	5.13e-05	Down	0	1	1
A_23_P304287	PSMC2	0.987209	3.75e-05	Down	0	1	1
A_24_P282309	MYOF	4.32e-05	0.105101	Down	1	0	1
A_23_P393656	NPHP3	0.458333	0.311206	Down	0	0	1
A_23_P99036	ACVR1B	0.597451	0.701131	Down	0	0	0
A_24_P278008	DCTN6	0.95071	0.00082009	Down	0	1	1
A_23_P100959	ZFP3	0.994491	0.182025	Down	0	0	1
A_24_P944378	EPB41L4A	0.779364	0.296502	Up	0	0	1
A_23_P320897	DENND1B	0.916656	0.244437	Down	0	0	0
A_24_P410639	TMEM33	0.981232	0.366566	Down	0	0	1
A_23_P27332	TCF4	0.000545437	0.259424	Down	1	0	0
A_23_P7030	MRPL3	0.976287	0.00267883	Up	0	1	1
A_23_P165891	TAF1B	0.753996	1.7e-05	Up	0	1	1
A_23_P27346	SMAD4	0.342007	0.855746	Down	0	0	1
A_24_P418809	GNAS	0.182298	0.0787954	Down	0	0	0
A_23_P202602	SEC23IP	0.492697	0.00380093	Down	0	1	1
A_23_P251916	FAM82B	0.488186	0.000657859	Up	0	1	0
A_23_P78372	THOC1	0.915287	0.382205	Down	0	0	1
A_23_P151791	LTB4R	0.844345	0.0267431	Up	0	1	0
A_23_P154108	DYNC1I2	0.273815	8.22e-06	Down	0	1	1
A_23_P24389	CCDC88B	0.956073	0.0405358	Up	0	1	1
A_23_P200598	MUL1	0.715876	0.102133	Down	0	0	1
A_23_P212511	TTC14	0.00885838	0.00137207	Down	1	1	1
A_23_P416813	ZFP82	0.98845	0.0166257	Down	0	1	0
A_23_P12730	CSTF2T	0.904128	0.120916	Up	0	0	1
A_23_P153930	ACVR2A	0.743826	0.225063	Down	0	0	1
A_23_P4640	ZNF548	0.952018	0.0216726	Up	0	1	1
CPID_586	PER1	0.951161	0.00678907	Up	0	1	1
A_23_P82394	USP42	0.317978	0.175661	Down	0	0	1
A_23_P214091	LYPLA1	0.977658	0.0785832	Up	0	0	1
A_24_P114617	CHMP2B	0.788525	0.0856893	Down	0	0	1
A_24_P902100	AGPS	0.168117	0.0396257	Down	0	1	1
A_24_P192821	TRIM44	0.00255804	0.152113	Down	1	0	1
A_24_P216964	NUCKS1	0.103559	0.00481655	Down	0	1	1
A_24_P252043	PTP4A1	0.657968	0.100053	Down	0	0	1
A_32_P25371	RPL35	0.543499	0.00230296	Up	0	1	1
A_32_P203430	ZNF30	0.976255	0.00381764	Down	0	1	1
A_23_P162256	DENR	0.951934	0.0116503	Up	0	1	1
A_24_P233878	GDAP2	0.0378757	0.583416	Down	1	0	1
A_23_P90463	LSM7	0.274668	0.000254691	Up	0	1	1
A_24_P284584	ZNF559	0.815397	0.00458026	Down	0	1	1
A_23_P335428	HIBADH	0.251352	0.0100661	Down	0	1	1
A_23_P5863	SMEK2	0.956733	0.60034	Down	0	0	1
A_24_P323610	MYO1F	0.193929	6.43e-05	Down	0	1	0
A_24_P917934	U2AF1	0.835501	0.75427	Down	0	0	1
A_24_P108442	C19orf56	0.951161	0.352859	Up	0	0	0
A_23_P214066	ARHGAP26	0.948424	7.76e-05	Up	0	1	1
A_24_P402898	OTUD4	0.437955	0.116238	Down	0	0	1
A_23_P208340	SLC44A2	0.991551	0.0135955	Up	0	1	1
A_23_P218717	UBOX5	0.255414	0.00197764	Up	0	1	1
A_23_P206041	MAN2A2	0.550952	0.220261	Up	0	0	1
A_24_P919460	RPS2	0.402011	0.521744	Up	0	0	1
A_23_P414654	RAB37	0.496243	0.0480365	Up	0	1	1
A_24_P45451	SLAMF6	0.111833	0.121593	Down	0	0	0
A_24_P285480	MRPL33	0.00907906	0.0125893	Up	1	1	1
A_32_P37974	LRRC58	0.00840601	0.00234584	Down	1	1	1
A_23_P13073	PUS3	0.843022	0.00386965	Up	0	1	1
A_23_P131653	PIGF	0.881037	3.78e-05	Up	0	1	1
A_24_P341504	RNPC3	0.953265	0.658845	Down	0	0	1
A_23_P252403	COMMD10	0.745492	0.00143536	Down	0	1	1
A_24_P681011	HIPK2	0.0849997	0.655682	Down	0	0	0
A_24_P355568	HBE1	0.0213469	0.0258946	Up	1	1	0
A_24_P85850	BNIPL	0.775464	0.245185	Down	0	0	1
A_23_P381992	ITGAV	0.503389	0.161644	Up	0	0	1
A_23_P145501	MED23	0.234694	0.605816	Down	0	0	1
A_23_P211997	SEC22C	0.88651	0.135574	Up	0	0	1
A_24_P6030	FAM165B	0.419705	0.19906	Up	0	0	0
A_23_P501887	DHPS	0.643858	0.054264	Up	0	0	1
A_23_P256933	RPL24	0.288416	0.00262193	Up	0	1	1
A_23_P412526	BCAP29	0.203801	0.479214	Down	0	0	1
A_24_P243776	ZNF277	0.948554	0.00243222	Down	0	1	1
A_23_P127533	DCUN1D5	0.767553	0.000508994	Down	0	1	1
A_23_P98565	MS4A14	0.941601	0.295728	Down	0	0	0
A_23_P352619	TIFA	0.30212	0.791439	Down	0	0	1
A_23_P91095	CD28	0.884461	0.00212553	Down	0	1	1
A_23_P11507	ZZZ3	0.940444	0.00288874	Down	0	1	1
A_23_P35399	ANXA11	0.529768	0.0259214	Down	0	1	1
A_23_P401700	APBB1IP	0.604234	0.00110074	Down	0	1	0
A_24_P933503	MON2	0.562592	0.156313	Down	0	0	1
A_23_P107693	ZNF586	0.881176	0.566717	Down	0	0	1
A_23_P391725	DR1	0.690245	0.473015	Up	0	0	1
A_23_P382045	TULP4	0.655304	0.538804	Up	0	0	0
A_32_P221452	RABL3	0.22346	0.378314	Down	0	0	1
A_24_P110967	PCMTD1	0.756206	0.171049	Down	0	0	1
A_23_P358928	SRI	0.478455	0.000407618	Up	0	1	1
A_23_P130626	TSEN34	0.926454	0.0158366	Up	0	1	1
A_23_P10463	NDUFS5	0.460475	0.00554975	Up	0	1	1
A_24_P125881	DGCR2	0.993013	0.00997013	Down	0	1	1
A_23_P128319	ATP2B1	2.33e-05	0.0527421	Down	1	0	0
A_23_P357966	PCMTD1	0.970145	0.242299	Down	0	0	1
A_23_P124855	ZCCHC7	0.892938	0.000682058	Down	0	1	1
A_23_P116168	KIAA1826	0.810851	0.00187852	Down	0	1	0
A_23_P94800	S100A4	0.113791	0.0720044	Up	0	0	1
A_23_P53957	COX16	0.68189	0.00151303	Up	0	1	1
A_23_P353514	MSL3	0.486124	0.94802	Up	0	0	1
A_24_P89257	ERGIC1	0.98063	8.49e-05	Up	0	1	1
A_24_P187948	BID	0.840461	0.562774	Up	0	0	1
A_23_P212844	TACC3	4.18e-05	7.93e-05	Down	1	1	1
A_32_P139654	SS18L1	0.900686	0.469867	Up	0	0	1
A_23_P147311	ACTRT1	0.327575	0.192889	Down	0	0	0
A_32_P54305	LOC401397	0.995239	0.00219841	Down	0	1	0
A_24_P411815	C7orf11	0.300424	0.379406	Up	0	0	0
A_24_P59545	ZNF451	0.0994137	0.887551	Down	0	0	1
A_24_P149023	SCAMP1	0.486124	0.3855	Down	0	0	1
A_23_P142861	AQP12B	0.879078	0.314305	Down	0	0	0
A_23_P16451	UBXN6	0.287054	0.191375	Up	0	0	1
A_23_P138706	ADRA2A	0.292329	0.0340808	Up	0	1	0
A_23_P11279	ALG13	0.892784	0.694166	Down	0	0	1
A_23_P120354	ANKRD57	0.539652	0.00839564	Down	0	1	0
A_24_P887553	GPR89B	0.712882	0.298009	Down	0	0	1
A_24_P917866	SET	0.156101	0.501923	Up	0	0	1
A_23_P28213	PPIL3	0.988477	0.000326222	Down	0	1	1
A_24_P382319	CEACAM1	0.730331	1.53e-05	Down	0	1	1
A_24_P63827	DNAJB6	0.98065	0.560826	Down	0	0	1
A_24_P247106	AK3	0.0450975	0.0114602	Down	1	1	1
A_32_P38145	PACSIN2	0.516455	0.0116391	Down	0	1	1
A_24_P614362	FAM13AOS	0.900686	0.0219134	Up	0	1	0
A_23_P368182	SLC41A1	0.601777	0.992344	Down	0	0	1
A_23_P170072	KCNMB2	0.981232	0.494769	Up	0	0	0
A_23_P123039	NUPL2	0.486068	0.0050651	Down	0	1	1
A_24_P54808	KLHL8	0.392917	0.0173937	Down	0	1	1
A_23_P86635	DCLRE1C	0.520118	0.600638	Down	0	0	1
A_23_P169030	TNFRSF10B	0.843527	0.0431764	Up	0	1	1
A_24_P106382	SENP6	0.779969	0.654947	Down	0	0	1
A_32_P82560	MTRF1L	0.562592	0.0214743	Down	0	1	1
CPID_191	RORA	0.0594261	0.00218556	Down	0	1	0
A_23_P13969	PXN	0.41363	0.000608487	Up	0	1	1
A_32_P86533	AF038185	0.158081	0.707344	Down	0	0	0
A_24_P807031	ATP6AP1L	0.988477	0.149531	Down	0	0	0
A_23_P250002	HACE1	0.848957	0.0170937	Down	0	1	1
A_23_P334414	TRAF3IP3	0.923166	0.0118788	Down	0	1	1
A_23_P434118	CEACAM1	0.313258	0.000116064	Down	0	1	1
A_23_P13524	TMEM126A	0.929798	0.00260031	Down	0	1	1
A_24_P139943	HS1BP3	0.769283	0.131001	Up	0	0	1
A_23_P327907	C8orf37	0.136352	0.35218	Down	0	0	0
A_24_P114255	MBOAT2	0.828281	0.000527291	Up	0	1	1
A_23_P141467	CDK5R1	0.363095	0.639427	Down	0	0	1
A_23_P24594	HSPA8	0.766892	0.314564	Down	0	0	1
A_24_P324749	ANKRD36B	0.601777	0.292613	Down	0	0	1
A_23_P75083	ZMYND11	0.844365	0.679179	Down	0	0	1
A_24_P242391	MPZL1	0.562592	0.000108037	Down	0	1	1
A_23_P25215	RECQL	0.0527405	0.000101937	Down	0	1	1
A_23_P212002	NKTR	0.938306	0.00373584	Down	0	1	1
A_23_P60089	DOCK5	0.325817	9.95e-05	Down	0	1	1
A_23_P96658	CYorf15B	0.981232	0.731664	Down	0	0	0
A_23_P118427	MAP2K3	0.83912	0.0701933	Up	0	0	1
A_24_P296698	MAP2K3	0.2035	0.395548	Up	0	0	1
A_23_P208055	LPIN2	0.0373334	0.0361636	Down	1	1	1
A_32_P208178	RPS3A	0.944949	0.000109703	Down	0	1	1
A_24_P229164	HIP1R	0.970208	0.299942	Up	0	0	1
A_24_P929106	PSIP1	0.474467	0.833751	Down	0	0	1
A_24_P321411	PRKRIR	0.802019	0.0218745	Down	0	1	1
A_32_P52609	LPIN1	0.104929	9.19e-05	Down	0	1	1
A_23_P329573	ITGB2	0.837889	0.00175373	Down	0	1	1
A_23_P93442	SASH1	0.926454	0.033871	Up	0	1	1
A_32_P155364	RPL7	0.989638	0.00201445	Down	0	1	1
A_23_P166716	RG9MTD1	0.815147	0.000775086	Down	0	1	0
A_23_P20002	ANKMY2	0.486124	0.00227339	Down	0	1	1
A_23_P96542	VMA21	0.10393	0.0388159	Up	0	1	1
A_23_P364167	ODF2L	0.170884	0.735274	Down	0	0	1
A_24_P137376	ATP2C1	0.198879	0.696129	Down	0	0	1
A_24_P110558	C5orf53	0.989749	0.00681485	Down	0	1	0
A_24_P131589	CD86	0.562592	0.304579	Up	0	0	0
A_23_P75402	NDUFS3	0.625664	3.96e-05	Up	0	1	1
A_23_P208198	ZNF577	0.2035	0.582686	Down	0	0	1
A_23_P84651	CNBP	0.263766	0.0609168	Down	0	0	1
A_23_P87709	PLBD1	0.569838	0.0089756	Up	0	1	0
A_23_P70290	TMEM30A	0.880585	0.162768	Down	0	0	1
A_23_P135271	B4GALT1	0.0207147	0.00335128	Down	1	1	1
A_23_P368934	FBRSL1	0.0881799	0.0259214	Up	0	1	1
A_23_P98483	ZBED5	0.773832	0.000216728	Down	0	1	1
A_24_P48627	PIAS4	0.604234	0.269101	Down	0	0	1
A_24_P377144	ANTXR2	0.00787924	0.00207299	Down	1	1	1
A_23_P201676	METTL13	0.133926	0.372654	Down	0	0	1
A_24_P77676	HSPA9	0.983536	0.405921	Down	0	0	1
A_23_P57089	PMEPA1	0.644765	0.879522	Down	0	0	1
A_23_P203645	CREBZF	0.718989	0.000498463	Down	0	1	1
A_32_P134167	CUL5	0.400892	0.00694411	Up	0	1	1
A_23_P56298	ZNF430	0.494053	0.209763	Down	0	0	1
A_24_P294703	PRRC1	0.783969	0.00275488	Down	0	1	1
A_23_P390755	C8orf45	0.145083	0.622738	Up	0	0	0
A_24_P940979	LGALS8	0.996181	0.379191	Down	0	0	1
A_23_P115316	TOR3A	0.948488	2.37e-05	Up	0	1	1
A_23_P159110	SLC35E3	0.818695	0.856718	Down	0	0	1
A_23_P250813	WRN	0.928342	0.0496594	Down	0	1	1
A_23_P70201	CHD1	3.23e-05	0.742979	Down	1	0	0
A_23_P103496	GBP4	0.000389896	0.717858	Down	1	0	1
A_23_P162374	DDX54	0.385086	0.0375355	Down	0	1	1
A_23_P50167	SLC39A6	0.0990454	0.0536952	Down	0	0	1
A_23_P111373	MRS2	0.907218	1.18e-05	Down	0	1	1
A_24_P923629	XPNPEP3	0.657968	0.916776	Down	0	0	1
A_32_P207360	AK2	0.998737	0.00588982	Down	0	1	1
A_23_P126844	TNFRSF25	0.532448	0.00464941	Up	0	1	0
A_23_P137957	RSBN1	0.117528	0.384713	Down	0	0	1
A_23_P65733	ZNF770	0.697402	0.693453	Down	0	0	1
A_23_P125348	TRAPPC1	0.986538	0.673639	Up	0	0	1
A_23_P214464	CCND3	0.779969	0.0189983	Up	0	1	1
A_23_P32426	RPF1	0.591574	0.000670388	Down	0	1	1
A_24_P649747	BMS1	0.645045	0.0135326	Up	0	1	1
A_24_P202978	MTMR3	0.681714	0.000102645	Down	0	1	1
A_24_P121956	TMEM86B	0.155411	0.214986	Up	0	0	1
A_24_P162319	SCML1	0.424117	0.0836891	Down	0	0	1
A_23_P167920	DLL1	0.989749	0.162768	Up	0	0	1
A_23_P165325	PREPL	0.0576801	0.0050914	Down	0	1	1
A_23_P20122	ZC3HAV1	0.327575	0.384776	Down	0	0	1
A_23_P31903	VPS28	0.673963	0.948884	Up	0	0	1
A_23_P52556	CTSD	0.456239	0.0100253	Down	0	1	1
A_24_P914495	MARK2	0.80973	0.597894	Down	0	0	1
A_24_P357518	RPL21	0.867526	0.000878958	Down	0	1	1
A_23_P137116	AMMECR1	0.989638	0.907398	Down	0	0	0
A_23_P216340	SLA	0.663855	0.00546899	Down	0	1	0
A_23_P258221	ABCC5	0.105348	0.0184507	Up	0	1	1
CPID_576	TIMELESS	0.984423	0.819443	Down	0	0	1
A_23_P255785	NCK1	0.640622	1.23e-05	Up	0	1	1
A_24_P388502	MTMR14	0.276931	0.726832	Down	0	0	1
A_23_P32029	SLC35D2	0.818719	0.0587711	Down	0	0	1
A_24_P114604	TBL1XR1	0.00787924	0.884841	Down	1	0	1
A_24_P102920	WDR33	0.445803	0.128358	Down	0	0	1
A_23_P25735	PSMA6	0.933613	0.000127507	Down	0	1	1
A_23_P61529	GLB1	0.818479	0.0630203	Up	0	0	1
A_24_P328969	YIPF5	0.934585	0.0836193	Down	0	0	1
A_23_P211738	UBP1	0.989638	0.0230029	Down	0	1	1
A_23_P144980	PIK3R1	0.395392	0.694758	Down	0	0	1
A_24_P345846	ANTXR2	0.00800825	0.000413756	Down	1	1	1
A_23_P79331	TMBIM1	0.904487	0.0582969	Up	0	0	1
A_23_P75071	KIF20B	0.945985	0.232482	Down	0	0	1
A_23_P300301	JMJD1C	0.00376222	0.394352	Down	1	0	1
A_32_P72831	LOC100131662	0.951934	0.763621	Down	0	0	0
A_24_P117866	ADD1	0.276931	0.0254003	Down	0	1	1
A_32_P34116	NUS1	0.981232	0.00207134	Down	0	1	1
A_23_P122624	LTV1	0.915385	2.76e-06	Down	0	1	1
A_23_P57989	TBL1XR1	0.492729	0.706709	Up	0	0	1
A_24_P65292	SOX8	0.443576	0.538289	Up	0	0	0
A_23_P26905	POLG2	0.879078	0.000336222	Up	0	1	1
A_24_P42613	COG3	0.908784	0.275093	Down	0	0	1
A_23_P132294	GGA1	0.739873	0.880071	Down	0	0	1
A_23_P122782	TCP1	0.853912	0.289985	Down	0	0	1
A_24_P49371	C4orf27	0.880011	0.176798	Up	0	0	0
A_23_P426021	SEL1L3	0.537295	0.0737364	Up	0	0	0
A_24_P120346	NIT2	0.253691	0.000353717	Up	0	1	1
A_24_P419211	MTMR6	0.976045	0.381827	Down	0	0	1
A_32_P489920	MTX3	0.411862	0.597192	Up	0	0	1
A_23_P133345	CLINT1	0.537303	0.21346	Down	0	0	1
A_23_P16197	CCDC106	0.926454	0.460666	Up	0	0	1
A_23_P106544	C16orf61	0.570952	0.000234976	Up	0	1	0
A_24_P333802	MAGT1	0.927186	0.122156	Down	0	0	1
A_23_P107154	USP32	0.419705	0.000490872	Down	0	1	1
A_23_P65442	IRF9	0.993009	0.20887	Up	0	0	1
A_23_P141434	ACACA	0.308188	0.384713	Down	0	0	1
A_23_P102109	TUBA4A	0.960633	0.00315826	Up	0	1	1
A_23_P33643	IL7R	0.00110214	0.0842219	Down	1	0	0
A_24_P675386	C11orf58	0.632136	0.0284365	Up	0	1	0
A_23_P204052	PCBP2	0.314206	0.0880024	Down	0	0	1
A_24_P76821	LMOD3	0.837889	0.320859	Up	0	0	0
A_23_P364478	FAM175B	0.991551	0.156355	Down	0	0	1
A_24_P25252	ANKRD12	0.0114181	0.100764	Down	1	0	1
A_24_P830690	PDPK1	0.0737139	0.151536	Down	0	0	1
A_23_P74320	SCYL3	0.915287	0.332065	Down	0	0	1
A_23_P79086	NFKBIB	0.676735	0.0122813	Up	0	1	1
A_23_P147388	KIF13B	0.930549	0.751138	Down	0	0	1
A_23_P68717	PSMG1	0.292329	0.00643469	Up	0	1	1
A_24_P314597	KIAA0319L	0.526891	0.0102893	Down	0	1	1
A_23_P334021	IGF2R	0.721262	3.83e-06	Down	0	1	1
A_23_P145397	CCNC	0.286202	0.000224664	Up	0	1	1
A_23_P300728	LMBR1	0.867351	0.643652	Up	0	0	1
A_23_P68577	HSPC072	0.571197	0.281353	Down	0	0	0
A_32_P81334	LARP4	1.24e-06	0.537958	Down	1	0	1
A_23_P135061	CORO2A	0.0556782	0.366634	Down	0	0	0
A_32_P209230	CITED4	0.99336	0.401008	Up	0	0	1
A_24_P89708	IMPDH1	0.990626	0.0693376	Up	0	0	1
A_24_P332230	LARP7	0.23676	0.000200451	Down	0	1	1
A_23_P111413	TSGA14	0.144707	0.799148	Down	0	0	0
A_24_P188800	MAR1	0.668746	0.00105941	Down	0	1	0
A_23_P167389	ARAP3	0.776671	9.8e-08	Up	0	1	1
A_23_P2692	COG3	0.183292	0.780016	Down	0	0	1
A_23_P92230	TSC22D2	0.957367	0.627915	Down	0	0	1
A_23_P207940	PTPN2	0.895552	0.0158708	Down	0	1	1
A_24_P48539	SIGLEC5	0.853274	0.000158031	Up	0	1	0
A_24_P243834	MTERFD1	0.892784	0.000371164	Down	0	1	0
A_23_P217785	CXorf26	0.997973	0.143891	Up	0	0	0
A_23_P119753	EHBP1	0.121902	0.848768	Down	0	0	1
A_23_P12140	RPL5	0.929446	0.0183764	Up	0	1	1
A_23_P63432	RHBDL2	0.929579	0.0594232	Up	0	0	0
A_23_P372946	TM4SF19	0.660446	0.453999	Down	0	0	1
A_23_P64044	FERMT3	0.516455	0.213035	Up	0	0	1
A_32_P22654	ALAS2	0.635889	0.0238165	Up	0	1	0
A_23_P58497	UTP15	0.998599	0.0904429	Down	0	0	1
A_24_P157165	MAP4K4	0.0120381	0.00265212	Down	1	1	1
A_23_P4294	ZNF232	0.743854	6.32e-05	Up	0	1	0
A_23_P132863	LSM3	0.749063	0.00610136	Down	0	1	1
A_23_P319512	KLF11	0.884608	0.0156261	Up	0	1	1
A_23_P131816	DNTTIP1	0.814422	0.135712	Down	0	0	1
A_24_P316305	AQR	0.958538	0.0223371	Up	0	1	1
A_32_P29408	LOC100240735	0.742052	7.82e-05	Up	0	1	1
A_23_P392470	NR3C2	0.276931	0.0445393	Down	0	1	1
A_24_P16997	MAP4K5	0.0013433	0.603755	Down	1	0	1
A_23_P210719	NSFL1C	0.810617	0.0543626	Up	0	0	1
A_23_P42664	SHFM1	0.870349	0.00315826	Down	0	1	1
A_23_P205046	ANKRD10	0.631844	0.263424	Up	0	0	1
A_23_P201483	MAPKAPK2	0.941509	0.239938	Up	0	0	1
A_32_P3556	VPS35	0.00686203	0.424102	Down	1	0	1
A_23_P109988	CD86	0.964755	0.0858495	Down	0	0	0
A_24_P346807	HERC4	0.958538	0.088094	Down	0	0	1
A_24_P253827	AP2B1	0.144707	0.0596277	Down	0	0	1
A_23_P104372	DNAJC9	0.87223	0.227115	Up	0	0	1
A_24_P51127	WNK1	0.503187	0.312851	Up	0	0	1
A_32_P174713	SRP72	0.00313352	0.152805	Down	1	0	1
A_23_P354929	CHD9	0.528439	0.96841	Down	0	0	1
A_32_P212058	C3orf34	0.856228	1.35e-05	Down	0	1	0
A_23_P54147	NIN	0.0106034	0.000703481	Down	1	1	0
A_23_P52885	C11orf61	0.779087	0.484297	Down	0	0	0
A_24_P928415	VPS29	0.995239	0.118047	Up	0	0	1
A_24_P311771	ZFR	0.000616098	0.121872	Down	1	0	0
A_23_P132486	OXSM	0.822403	0.000315557	Down	0	1	1
A_24_P233944	CEPT1	0.47935	0.00446016	Down	0	1	1
A_24_P175187	SAMD9	0.257491	0.0609676	Down	0	0	0
A_23_P328069	HPS1	0.103559	0.0357995	Up	0	1	1
A_24_P53985	ZMYM1	0.492697	0.00137207	Down	0	1	1
A_24_P915926	COBLL1	0.0277553	0.505434	Down	1	0	1
A_23_P70670	CD83	0.934585	1.08e-06	Up	0	1	1
A_23_P501805	LIPT1	0.976287	0.000828385	Down	0	1	1
A_23_P215931	LEPROTL1	0.929491	0.0783167	Down	0	0	1
A_24_P406664	RAD23B	0.976287	0.286996	Up	0	0	1
A_23_P143414	ROMO1	0.427466	0.062059	Up	0	0	1
A_24_P48078	CYLD	0.287605	0.160145	Down	0	0	1
A_32_P501400	TCP1	0.171836	0.80052	Down	0	0	1
A_23_P138262	PADI4	0.996193	3.59e-05	Up	0	1	0
A_23_P91769	NDUFA6	0.298828	0.00698864	Up	0	1	1
A_23_P134384	PHF14	0.836708	0.197516	Down	0	0	1
A_23_P408787	C1orf150	0.797025	0.339836	Down	0	0	0
A_24_P375421	SNX22	0.172581	0.32413	Up	0	0	1
A_24_P626981	NUDT16P	0.500532	0.0628719	Down	0	0	0
A_23_P24796	FAM160A2	0.44316	0.537112	Up	0	0	1
A_23_P30950	SLC26A8	0.929446	9.52e-05	Up	0	1	0
A_23_P74629	RPS27	0.846943	0.00300024	Down	0	1	1
A_23_P216949	PDCL	0.86912	0.474037	Down	0	0	1
A_23_P131954	SNX5	0.932678	0.00685074	Up	0	1	1
A_24_P110937	PCID2	0.176366	0.72454	Down	0	0	1
A_23_P315206	CCBL1	0.804843	0.55403	Up	0	0	1
A_23_P128337	PTMS	0.417704	0.0733363	Up	0	0	1
A_24_P34344	TRIM33	0.056207	0.0117039	Down	0	1	1
A_23_P34744	CTSK	0.239379	0.341998	Up	0	0	0
A_24_P52733	IL10RA	0.915287	0.587464	Up	0	0	1
A_24_P83922	SNRPC	0.627431	0.295506	Down	0	0	1
A_32_P201498	C20orf30	0.71016	0.00315992	Down	0	1	0
A_23_P340158	ISCU	0.673477	0.482883	Up	0	0	1
A_24_P62615	CAP1	0.10871	0.0105505	Down	0	1	1
A_23_P40072	MTIF2	0.474467	0.0290147	Down	0	1	1
A_23_P213441	UTP15	0.562592	0.00283161	Up	0	1	1
A_23_P420361	C3orf10	0.03469	0.0757122	Up	1	0	0
A_23_P99249	SUCLG2	0.168117	0.0308941	Down	0	1	1
A_23_P107684	ZNF324	0.532752	0.614047	Up	0	0	1
A_23_P134980	FGD3	0.133765	0.000637202	Down	0	1	0
A_24_P390315	KIAA0391	0.350226	0.86261	Down	0	0	1
A_23_P56170	MED16	0.930549	0.220853	Up	0	0	1
A_24_P406060	RNF144B	0.997189	0.0139926	Down	0	1	0
A_24_P174775	NNT	0.497763	0.258642	Down	0	0	1
A_32_P165611	KIF13B	0.567338	0.194925	Down	0	0	1
A_23_P50638	LRG1	0.767553	0.000107384	Down	0	1	0
A_24_P357056	C22orf25	0.87223	0.527051	Up	0	0	0
A_24_P65910	UQCC	0.99336	0.00897533	Down	0	1	0
A_24_P117147	KIR3DL1	0.257079	0.0509133	Down	0	0	0
A_24_P364845	ZNF213	0.863533	0.0494928	Down	0	1	1
A_23_P256445	VCPIP1	0.498963	0.0665771	Down	0	0	1
A_23_P30435	TNIP1	0.956733	0.279543	Up	0	0	0
A_23_P150092	SEPHS1	0.766079	0.00211129	Up	0	1	1
A_24_P159702	LMAN1	0.458359	0.726246	Down	0	0	1
A_23_P40433	C21orf63	0.994371	0.842323	Up	0	0	0
CPID_580	TIMELESS	0.854578	0.645705	Up	0	0	1
A_24_P5994	BX647159	0.412226	0.0111468	Down	0	1	0
A_23_P252825	SCAP	0.930246	0.199118	Up	0	0	1
A_32_P68533	FAM161A	0.790311	0.130266	Down	0	0	1
A_23_P2041	MICALCL	0.797751	0.00197394	Up	0	1	1
A_23_P35576	ZNF518A	0.374348	0.638918	Down	0	0	1
A_24_P418408	FAM89A	0.339835	0.110804	Up	0	0	0
A_23_P411814	OSTC	0.631859	0.0015211	Up	0	1	1
A_24_P201323	ZMYND11	0.322528	0.122363	Down	0	0	1
A_32_P150030	PPM1D	0.948484	0.572709	Down	0	0	1
A_23_P94370	CPNE3	0.791887	0.75427	Up	0	0	1
A_23_P153026	GAA	0.715629	0.0682538	Up	0	0	1
A_23_P384024	CCDC50	0.659443	0.0017223	Down	0	1	1
A_23_P213562	F2R	0.230658	0.461412	Down	0	0	1
A_24_P417162	TBL1X	0.708657	0.350741	Down	0	0	1
A_23_P396086	AASDH	0.741997	0.860067	Up	0	0	1
A_23_P212469	ENTPD3	0.902592	0.50199	Up	0	0	0
A_23_P373645	TIMM23	0.915287	0.000179806	Up	0	1	1
A_24_P50972	GOLGA6L6	0.667182	0.163819	Up	0	0	1
A_24_P237374	UBA1	0.366947	0.0403339	Down	0	1	1
A_24_P256539	C12orf47	0.933093	0.00149106	Down	0	1	0
A_23_P31376	LRRN3	0.183116	0.000643215	Down	0	1	0
A_23_P34877	RBM15	0.242136	0.037352	Down	0	1	1
A_23_P31073	MYB	0.900686	0.2373	Down	0	0	1
A_23_P52101	CYB5R1	0.234694	0.995922	Up	0	0	1
A_24_P190541	BRWD1	0.774251	0.146373	Down	0	0	1
A_23_P6151	PLAGL2	0.311595	0.30483	Down	0	0	1
A_23_P102454	INSIG2	0.503389	0.00573386	Up	0	1	1
A_23_P159172	AATK	0.802019	0.000471225	Up	0	1	1
A_24_P195693	RPL23A	0.939569	0.000833692	Up	0	1	1
A_23_P255273	RAD23B	0.610688	0.4793	Down	0	0	1
A_23_P162807	MRPS31	0.960624	0.000652298	Down	0	1	1
A_32_P1701	POLA1	0.358083	0.0858062	Down	0	0	1
A_23_P17655	KCNJ15	0.910472	7.05e-08	Up	0	1	0
A_24_P408083	DNMT1	0.0301315	0.00134999	Down	1	1	1
A_23_P202435	ADD3	0.90158	0.111187	Up	0	0	1
A_32_P26464	C21orf128	0.820509	0.117456	Down	0	0	0
A_23_P142616	BIRC6	0.537088	0.029048	Down	0	1	1
A_24_P365767	CYBB	0.582469	0.0852063	Down	0	0	0
A_32_P224840	AKTIP	0.357825	0.956949	Down	0	0	1
A_23_P109877	WDR82	0.0165204	0.172707	Down	1	0	1
A_23_P2661	RAP1B	0.735963	0.0787439	Up	0	0	1
A_23_P103503	MDM4	0.826766	0.468475	Down	0	0	1
A_24_P85045	PNPLA8	0.35787	0.0846422	Down	0	0	1
A_24_P278637	FADD	0.558338	0.0711216	Down	0	0	1
A_23_P258570	PSMD10	0.787451	0.0021256	Down	0	1	1
A_24_P109244	MON2	0.285548	0.32003	Down	0	0	1
A_24_P194886	EHBP1	0.00548205	0.738437	Down	1	0	1
A_23_P380965	JKAMP	0.779969	0.0706298	Down	0	0	1
A_24_P181506	ZNF646	0.893401	8.2e-07	Down	0	1	1
A_23_P44295	CLASP2	0.976287	0.0342765	Down	0	1	1
A_23_P4679	ERF	0.603741	0.119416	Up	0	0	1
A_24_P116909	MALT1	0.555512	0.0530043	Down	0	0	1
A_24_P341187	GBA2	0.84575	0.493717	Up	0	0	1
A_24_P294124	SERTAD2	0.067366	0.0749444	Down	0	0	1
A_23_P421811	C20orf132	0.325413	0.00567513	Up	0	1	0
A_23_P71908	SNAPC3	0.711797	3.64e-05	Down	0	1	1
A_24_P87498	TMUB2	0.455349	0.381827	Down	0	0	1
A_23_P129038	EVL	2.34e-07	0.00605886	Down	1	1	1
A_23_P15995	SIGLEC5	0.910562	1.45e-06	Up	0	1	0
A_23_P84775	PLRG1	0.821027	0.000223818	Down	0	1	1
A_23_P2446	TMEM5	0.976287	0.00135826	Up	0	1	1
A_23_P30264	IPO11	0.0277553	0.37167	Up	1	0	1
A_23_P214882	MTRF1L	0.853746	0.201226	Down	0	0	1
A_23_P87329	NAT10	0.805423	0.289055	Up	0	0	1
A_23_P100133	ATMIN	0.419137	0.142925	Down	0	0	1
A_23_P12147	C1orf74	0.257491	0.203158	Down	0	0	0
A_23_P215599	SRPK2	0.965692	3.56e-05	Down	0	1	0
A_24_P335620	SLC7A5	0.437955	0.836104	Up	0	0	1
A_24_P114459	RYBP	0.00930786	0.00615447	Down	1	1	0
A_24_P78540	NR2C1	0.802816	4.59e-06	Up	0	1	1
A_23_P250462	ATP6AP1	0.976255	0.000405653	Up	0	1	1
A_24_P360269	RNASET2	0.843312	0.00358776	Down	0	1	1
A_32_P52206	TYW1	0.00545251	0.125107	Down	1	0	1
A_23_P80773	SRPRB	0.774621	1.37e-05	Up	0	1	0
A_23_P65089	DDX47	0.908784	0.00235633	Down	0	1	1
A_23_P123866	UBAP1	0.918656	0.0149145	Down	0	1	1
A_23_P163850	CREBBP	0.981232	0.0011339	Up	0	1	1
A_23_P110062	EIF2B5	0.601374	0.00764704	Up	0	1	1
A_24_P193435	TJP1	0.446789	0.296158	Up	0	0	1
A_24_P931428	TCF4	0.747534	0.119494	Down	0	0	0
A_24_P358245	LOC158381	0.302135	0.0400955	Up	0	1	0
A_23_P87603	TARBP2	0.56137	0.0170433	Up	0	1	1
A_23_P202881	FEZ1	0.6162	7.05e-08	Up	0	1	0
A_32_P41662	MTRF1L	0.810851	0.0292209	Up	0	1	1
A_23_P151690	ACTR10	0.976045	0.0219089	Down	0	1	1
A_24_P268160	DRAM2	0.649123	4.91e-05	Up	0	1	1
A_24_P256325	REV1	0.288802	0.860067	Down	0	0	1
A_23_P217447	LAMP2	0.769283	0.0063946	Down	0	1	1
A_32_P68586	ARL1	0.810617	1.27e-05	Up	0	1	1
A_23_P152173	KIAA0513	0.456239	0.00239522	Down	0	1	1
A_24_P279328	INPP5K	0.939569	0.196313	Up	0	0	1
A_23_P111343	BCLAF1	0.0259231	0.251441	Down	1	0	1
A_23_P30474	WDR70	0.932678	0.00175601	Up	0	1	1
A_32_P234827	ARMC1	0.0118755	0.00464255	Down	1	1	1
A_24_P935330	PRKCB	0.280073	0.0543211	Down	0	0	1
A_23_P58529	DIMT1L	0.843312	0.00195805	Up	0	1	0
A_23_P411806	SLC44A1	0.970208	0.817267	Up	0	0	1
A_23_P153964	INHBB	0.372041	0.000119055	Up	0	1	0
A_24_P329152	CD2AP	0.138266	0.127813	Down	0	0	1
A_24_P188460	PTP4A2	0.239379	0.214505	Down	0	0	1
A_24_P105891	DZIP1L	0.801762	0.754463	Up	0	0	1
A_23_P115460	RPL22	0.335545	3.65e-05	Up	0	1	1
A_24_P911066	FOXO4	0.611887	0.548484	Up	0	0	1
A_23_P101185	NARS	0.567338	0.00464255	Up	0	1	1
A_23_P27638	ZNF700	0.956733	0.000404801	Down	0	1	1
A_24_P155761	AKAP13	3.55e-07	0.00490399	Down	1	1	1
A_24_P48014	SOCS1	0.890827	0.220058	Down	0	0	1
A_23_P255869	C9orf46	0.942572	0.00249881	Down	0	1	0
A_23_P145388	MTCH1	0.454422	0.544354	Up	0	0	1
A_32_P129621	ADAM17	0.166459	0.00897503	Down	0	1	1
A_24_P454313	HNRNPA1	0.950249	0.000690903	Down	0	1	1
A_23_P104199	ITGB1	1.94e-05	0.0620127	Down	1	0	1
A_23_P87853	TMCC3	0.949629	1.12e-05	Down	0	1	0
A_24_P942030	VAMP4	0.922135	7.93e-05	Up	0	1	1
A_23_P141329	RPS6KB1	0.738373	0.0124703	Up	0	1	1
A_24_P306726	TPT1	0.462407	0.00354188	Up	0	1	1
A_32_P141135	TRAF3IP3	0.783969	0.270882	Down	0	0	1
A_23_P204472	RPLP0	0.552039	0.0175336	Down	0	1	1
A_24_P157053	ADAM17	0.660529	0.884656	Up	0	0	1
A_23_P300826	C6orf136	0.914413	0.746782	Up	0	0	0
A_24_P406939	C11orf1	0.847809	0.372833	Up	0	0	0
A_23_P87363	ART1	0.99922	0.318863	Down	0	0	0
A_23_P37275	CGRRF1	0.582433	0.00487727	Up	0	1	1
A_23_P40548	YPEL1	0.998346	0.650917	Up	0	0	1
A_23_P346982	DTWD2	0.956733	0.207382	Down	0	0	1
A_23_P340457	COPS4	0.941509	0.000602936	Down	0	1	1
A_23_P155677	UBE2K	0.537115	0.682557	Down	0	0	1
A_24_P376229	UBA2	0.892938	4.44e-06	Down	0	1	1
A_24_P576506	SPRN	0.487385	0.661316	Up	0	0	0
A_24_P292710	C14orf129	0.802816	0.00360069	Down	0	1	0
A_24_P93916	PER1	0.37483	0.558826	Up	0	0	1
A_24_P298027	AXIN2	0.880011	0.490229	Up	0	0	1
A_23_P500364	BCL7B	0.239379	0.990559	Up	0	0	1
A_23_P408094	MXD1	0.0378757	2.68e-05	Down	1	1	1
A_23_P119964	CEBPZ	0.674134	0.00030229	Down	0	1	1
A_23_P75204	NSMCE4A	0.715656	9.13e-06	Up	0	1	1
A_23_P157283	C7orf23	0.807371	0.264739	Down	0	0	0
A_23_P131771	TPD52L2	0.934628	0.0948069	Up	0	0	1
A_23_P52382	DNAJB12	0.621953	0.732374	Down	0	0	1
A_23_P251611	TBC1D9B	0.941509	0.191946	Down	0	0	1
A_24_P172768	GMFB	0.904487	0.00130048	Down	0	1	1
A_32_P11499	UBE2N	0.622681	0.000506351	Up	0	1	1
A_23_P94942	SHARPIN	0.925154	0.277004	Up	0	0	1
A_24_P362317	ADAR	0.0527405	3.8e-05	Down	0	1	1
A_23_P127279	FAM35A	0.988103	2.16e-05	Down	0	1	1
A_23_P56567	GEMIN6	0.792211	0.00817739	Down	0	1	1
A_24_P139665	HPCAL4	0.443576	0.161919	Down	0	0	1
A_23_P14105	RCBTB2	0.915287	0.812382	Down	0	0	1
A_23_P323488	C9orf102	0.00107448	0.0629808	Down	1	0	0
A_23_P126266	HLX	0.339451	0.0124338	Down	0	1	1
A_23_P121250	EIF4A2	0.918542	0.00055323	Up	0	1	1
A_23_P335661	SAMD4A	0.230116	0.381975	Down	0	0	1
A_23_P31833	EEF1D	0.518454	0.507052	Up	0	0	1
A_23_P305016	TADA3	0.577643	0.44442	Down	0	0	1
A_23_P305711	RYBP	0.976255	0.00481678	Up	0	1	0
A_24_P59220	POTEF	0.114753	0.0253616	Down	0	1	1
A_23_P69249	ACTL6A	0.749063	2.89e-05	Up	0	1	1
A_23_P350467	MAPKAPK2	0.970208	0.00613103	Up	0	1	1
A_23_P14798	NEO1	0.881176	0.160682	Up	0	0	1
A_23_P73589	MSN	0.58803	0.0784084	Down	0	0	1
A_32_P119204	RPS10	0.735007	0.00032878	Up	0	1	1
A_23_P144257	COPS8	0.840212	7.14e-05	Up	0	1	1
A_23_P64669	ZCCHC8	0.929491	0.215508	Down	0	0	1
A_23_P256244	OXR1	0.657968	0.786666	Down	0	0	1
A_24_P232856	RPL9	0.991551	0.00176042	Down	0	1	1
A_23_P374082	ADAM19	0.714443	2.23e-05	Up	0	1	1
A_23_P167324	PKD2	0.0151764	0.767577	Down	1	0	0
A_23_P131887	SOX12	0.982406	0.802456	Up	0	0	1
A_23_P88095	TBC1D4	0.929446	0.00107668	Up	0	1	1
A_24_P16592	ADCK4	0.664575	0.373547	Down	0	0	1
A_23_P325438	XPO6	0.27929	0.0317415	Down	0	1	1
A_24_P261052	MTMR9	0.740354	0.0294166	Down	0	1	1
A_23_P127995	CLNS1A	0.915385	2e-06	Down	0	1	1
A_24_P399694	ZCCHC3	0.972619	0.0152814	Up	0	1	1
A_24_P126471	SLC12A9	0.812619	0.742449	Up	0	0	1
A_32_P152348	HIST1H2BD	0.111059	0.972927	Up	0	0	1
A_23_P314526	FLOT1	0.730455	0.0166732	Down	0	1	0
A_24_P171182	ACBD3	0.837889	0.443488	Up	0	0	1
A_23_P212535	CHMP2B	0.6165	0.159374	Down	0	0	1
A_23_P311020	MITD1	0.840257	0.00444986	Down	0	1	1
A_32_P335921	ROPN1L	0.109319	0.000389279	Up	0	1	1
A_24_P13682	TLE3	0.398992	1.37e-05	Down	0	1	1
A_24_P362646	TXNDC9	0.900139	0.000865797	Down	0	1	1
A_24_P920758	WWC1	0.663855	0.40036	Up	0	0	1
A_23_P412980	SNX13	0.916972	0.399994	Down	0	0	1
A_24_P942328	DHFR	0.22346	0.246132	Up	0	0	1
A_23_P372255	ITPKB	0.998346	0.0801757	Up	0	0	0
A_24_P266880	UBC	0.838298	0.386785	Down	0	0	1
A_24_P120115	CFLAR	0.0579619	0.00197673	Down	0	1	1
A_24_P921327	TAPT1	0.976045	0.0590795	Down	0	0	0
A_32_P98975	C15orf57	0.667182	0.0105768	Down	0	1	0
A_24_P307572	ANKRD13A	0.0142363	0.000656127	Down	1	1	1
A_24_P25054	HNRNPA1L2	0.28999	0.0531461	Down	0	0	1
A_23_P3532	LITAF	0.694514	0.000222393	Down	0	1	1
A_23_P338603	CHCHD7	0.367446	0.355974	Up	0	0	1
A_23_P151471	CUL4A	0.83912	0.000817247	Up	0	1	1
A_23_P139669	SLC2A3	0.788168	6.26e-05	Down	0	1	1
A_23_P86917	FADD	0.543499	0.0612313	Up	0	0	1
A_23_P334798	LRRC2	0.911886	0.312361	Up	0	0	0
A_23_P378968	PTP4A2	0.835338	0.819966	Down	0	0	1
A_23_P209088	COPE	0.989638	0.853571	Up	0	0	1
A_23_P337464	LYRM7	0.761434	0.731627	Down	0	0	1
A_32_P11477	FAU	0.972125	0.00294277	Down	0	1	1
A_24_P94916	LST1	0.288416	0.223611	Up	0	0	0
A_24_P416097	UNC45A	0.949629	0.130095	Up	0	0	1
A_32_P25204	PRKDC	0.0134255	0.122363	Down	1	0	1
A_23_P60506	C4orf27	0.44083	0.000342158	Up	0	1	0
A_23_P1492	AVPI1	0.492812	0.825906	Up	0	0	1
A_24_P167642	GCH1	0.730948	0.0185297	Down	0	1	1
A_23_P391275	RCAN3	0.000351321	0.312161	Down	1	0	0
A_24_P218587	MED17	0.954021	0.781768	Down	0	0	1
A_23_P36513	PRKAG1	0.679904	0.568078	Down	0	0	1
A_24_P1929	DDX52	0.239379	0.654262	Down	0	0	1
A_24_P382113	LUC7L3	0.988477	0.0218562	Down	0	1	1
A_24_P414256	CCDC72	0.529913	0.00454245	Up	0	1	0
A_23_P93844	TOMM7	0.674613	0.00704493	Up	0	1	1
A_23_P26084	SELS	0.794827	0.0569802	Up	0	0	0
A_23_P43248	TAF2	0.868072	0.76554	Down	0	0	1
A_23_P380917	SEC11A	0.64185	0.0774264	Up	0	0	1
A_23_P170857	IL1RAP	0.719489	0.108928	Up	0	0	1
A_24_P391811	DOCK10	0.260014	0.0323296	Down	0	1	1
A_23_P62652	SLAMF1	0.840058	0.0012898	Up	0	1	1
A_23_P3823	BCKDK	0.685454	0.561531	Down	0	0	1
A_23_P98382	TIMM8B	0.577753	0.0126205	Up	0	1	1
A_23_P211099	SON	0.267837	0.0371028	Down	0	1	1
A_23_P97841	ITIH5	0.988477	0.160318	Up	0	0	0
A_23_P1387	ARHGAP19	0.488186	0.393033	Down	0	0	1
A_23_P90079	ZNF799	0.791887	0.00326567	Down	0	1	1
A_24_P255798	SHARPIN	0.989749	0.456052	Up	0	0	1
A_32_P139079	SERBP1	0.00465369	0.0303117	Down	1	1	1
A_24_P398016	STRBP	0.0138666	0.419394	Down	1	0	1
A_23_P106	USP33	0.376981	0.837826	Down	0	0	1
A_32_P627	TAF9B	0.149728	0.888463	Up	0	0	1
A_23_P335398	LST1	0.26471	0.437824	Up	0	0	0
A_24_P156922	SCP2	0.326611	0.317382	Down	0	0	1
A_24_P45367	NIPAL3	0.808892	0.00508856	Down	0	1	1
A_23_P311885	L3MBTL3	0.746676	0.00810524	Down	0	1	0
A_23_P8561	RHBDD2	0.952304	0.354045	Up	0	0	1
A_23_P146943	ATP1B1	0.628215	0.0205051	Up	0	1	1
A_23_P89799	ACAA2	0.802019	0.00230296	Down	0	1	1
A_23_P19226	DSE	0.916138	0.00449126	Down	0	1	1
A_24_P313576	VAMP2	0.959191	0.111057	Up	0	0	1
CPID_185	RORA	0.0475277	0.0502949	Down	1	0	0
A_23_P256988	ACYP2	0.116813	0.0711433	Up	0	0	1
A_23_P364567	CLRN1	0.957597	0.83167	Down	0	0	0
A_23_P124108	ITGAM	0.894377	0.00101881	Down	0	1	0
A_32_P460973	HLA-E	0.28377	0.266169	Down	0	0	1
A_24_P926400	GGA1	0.71016	0.268239	Up	0	0	1
A_32_P184003	CCDC91	0.250501	0.012623	Down	0	1	0
A_24_P357536	FBXO11	0.15905	0.0160273	Down	0	1	1
A_23_P37718	CNGB1	0.952018	0.325922	Up	0	0	0
A_23_P104451	DDX50	0.853272	0.0326528	Down	0	1	1
A_24_P98524	PPP3CB	0.976255	0.00020398	Down	0	1	1
A_23_P122233	MRPL22	0.327575	0.000575665	Up	0	1	1
A_32_P107797	LOC728640	0.989749	0.117387	Down	0	0	0
A_23_P251730	ATP11C	0.698441	0.198479	Down	0	0	0
A_32_P192430	CKS1B	0.369661	0.25378	Up	0	0	1
A_23_P256158	ADRA2C	0.552039	0.108396	Up	0	0	0
A_24_P830025	FNTA	0.326129	0.798431	Up	0	0	1
A_24_P924836	CRYZL1	0.168617	0.941624	Down	0	0	1
A_23_P115762	ECD	0.977658	0.988272	Down	0	0	1
A_24_P230907	FAM149B1	0.458759	0.117899	Up	0	0	1
A_32_P342064	FTH1	0.997189	0.021993	Down	0	1	1
A_23_P104193	ITGB1	0.00101142	0.230366	Down	1	0	1
A_23_P18304	UBA5	0.991551	0.000105198	Down	0	1	0
A_23_P126752	CAPZB	0.676735	0.881616	Down	0	0	1
A_23_P41697	FEM1C	0.993009	0.23771	Down	0	0	1
A_23_P345928	C12orf26	0.824986	0.248769	Down	0	0	0
A_24_P117964	BOD1	0.945988	0.00107018	Down	0	1	1
A_32_P42197	HNRNPA1	0.954947	4.77e-06	Up	0	1	1
A_23_P252704	ZNF706	0.900686	0.00200852	Up	0	1	1
A_23_P110787	SCAMP1	0.443576	0.887551	Down	0	0	1
A_23_P117623	TDP1	0.840305	0.409807	Up	0	0	1
A_24_P33048	C14orf28	0.947195	0.122022	Down	0	0	0
A_24_P355772	CDC2L1	0.00676616	0.0893758	Down	1	0	0
A_24_P91916	NXT2	0.919258	0.0025907	Down	0	1	1
A_24_P393285	USP48	0.00108796	0.475483	Down	1	0	1
A_24_P923962	STAT3	0.334312	0.00765205	Down	0	1	1
A_24_P107859	SPRED1	0.825569	0.000110809	Down	0	1	1
A_23_P214474	TOMM6	0.264319	0.00108373	Up	0	1	1
A_23_P252857	BRIX1	0.582433	0.000115435	Down	0	1	1
A_23_P59426	PAXIP1	0.887927	0.025443	Up	0	1	1
A_23_P122815	CALU	0.905736	0.997566	Down	0	0	1
A_32_P30813	PTGES3	0.944069	0.000396679	Up	0	1	1
A_24_P97257	RPL31	0.865471	0.00388573	Down	0	1	1
A_23_P325661	ZNF134	0.5442	0.0189251	Down	0	1	1
A_23_P88141	GPHN	0.00629112	0.94692	Down	1	0	1
A_23_P258340	PPIA	0.703328	0.00312991	Up	0	1	1
A_23_P101374	CYP2S1	0.708657	0.467831	Up	0	0	1
A_23_P419192	ZNF800	8.7e-07	0.789811	Down	1	0	1
A_24_P191781	PARM1	0.889268	0.12397	Up	0	0	0
A_23_P383053	APPBP2	0.130471	0.663433	Down	0	0	1
A_24_P239731	B4GALT5	0.646657	3.83e-06	Down	0	1	1
A_23_P139295	TRIM44	0.146794	0.0294345	Down	0	1	1
A_23_P114814	RHOU	0.460475	0.719681	Down	0	0	1
A_23_P42163	RPL7L1	0.170763	0.00275488	Down	0	1	1
A_23_P404005	FAM58A	0.0836991	0.00233415	Up	0	1	1
A_23_P74145	CD48	0.733643	0.00242185	Down	0	1	1
CPID_594	PER1	0.7863	0.302257	Up	0	0	1
A_23_P1833	B3GAT1	0.254475	0.0601985	Up	0	0	0
A_32_P216426	HNRNPA1L2	0.657039	0.0496594	Down	0	1	1
A_23_P428849	CHCHD4	0.5442	3.83e-06	Up	0	1	1
A_24_P290623	KIAA0913	0.955038	0.00669712	Down	0	1	0
A_24_P410562	SLC9A6	0.0608608	0.339258	Down	0	0	1
A_24_P107142	ANXA11	0.972619	0.00573043	Up	0	1	1
A_23_P399112	MYADM	0.989638	0.00141099	Up	0	1	1
A_23_P102607	CHD6	0.604234	0.281538	Down	0	0	1
A_24_P176409	ZFP90	0.5942	0.0978531	Down	0	0	1
A_32_P142013	RABEP1	0.656724	0.516196	Up	0	0	1
A_23_P17130	C2orf88	0.825569	0.0537473	Up	0	0	0
A_32_P98732	GCM1	0.826766	0.398329	Down	0	0	0
A_23_P476	MPZL1	0.932369	2.04e-07	Down	0	1	1
A_23_P139260	SLC22A18	0.891053	0.121422	Down	0	0	1
A_24_P201960	CCDC85C	0.897218	0.00451451	Down	0	1	1
A_24_P920904	C8orf59	0.389828	0.504849	Up	0	0	0
A_23_P31840	EEF1D	0.892938	0.00711193	Up	0	1	1
A_23_P100263	CMIP	0.880585	0.184676	Down	0	0	1
A_32_P46765	C12orf29	0.87249	0.00102316	Up	0	1	0
A_23_P207493	LUC7L3	0.655875	4.78e-06	Down	0	1	1
A_23_P70020	PFDN1	0.989749	0.00020398	Up	0	1	0
A_23_P110304	CNOT6L	0.874931	0.711911	Up	0	0	1
A_23_P308464	ARID2	0.946231	0.9437	Up	0	0	1
A_24_P68079	TRANK1	0.663855	0.00133324	Down	0	1	0
A_23_P106204	GSTZ1	0.912669	0.000645452	Up	0	1	1
A_24_P134727	TFAM	0.486124	0.82951	Up	0	0	1
A_23_P114736	KCNJ10	0.934585	0.47398	Down	0	0	1
A_23_P209316	CCNT2	0.183116	0.388812	Down	0	0	1
A_23_P101943	ARL5A	0.543965	0.217459	Down	0	0	1
A_23_P105392	CCT2	0.693824	0.00101461	Up	0	1	1
A_24_P77364	BOLA3	0.458759	0.0452635	Up	0	1	1
A_23_P24903	P2RY2	0.845245	0.190616	Down	0	0	1
A_23_P126298	FCGR3B	0.00424916	3.83e-06	Down	1	1	0
A_23_P39774	SNRNP27	0.948488	0.00351214	Down	0	1	1
A_23_P129614	NUDT21	0.766176	0.00866018	Up	0	1	1
A_23_P17570	ZNF341	0.249929	0.00131145	Down	0	1	1
A_24_P472007	UNC13A	0.676735	0.743767	Down	0	0	1
A_23_P205828	TJP1	0.17352	0.0426838	Up	0	1	1
A_24_P247987	C16orf57	0.530508	0.833389	Up	0	0	0
A_24_P940288	PGS1	0.326451	0.0706041	Down	0	0	1
A_23_P407090	NFXL1	0.000296082	0.0583233	Down	1	0	1
A_32_P82409	NAP1L1	0.37483	0.591706	Up	0	0	1
A_24_P263144	BMX	0.547207	0.000875022	Down	0	1	0
A_24_P256552	CSTF3	0.825569	0.011646	Down	0	1	1
A_23_P343963	FAM83F	0.728137	0.215999	Down	0	0	0
A_24_P114551	LPP	0.480063	0.00380238	Down	0	1	1
A_32_P542928	ZNF789	0.792211	0.116939	Down	0	0	1
A_23_P354193	TBC1D20	0.783969	0.481542	Down	0	0	1
A_23_P98953	SLC15A4	0.970208	0.0959345	Up	0	0	1
A_32_P14978	CEP152	0.00343674	0.269059	Down	1	0	1
A_32_P30926	DYNC1I2	0.158081	0.00311032	Down	0	1	1
A_24_P68162	DIP2B	0.870349	0.000281033	Down	0	1	1
A_23_P131348	THUMPD2	0.739258	0.000234335	Up	0	1	1
A_23_P46396	PTBP2	0.902602	0.000499749	Down	0	1	1
A_23_P111206	FKBP5	0.450352	0.00391043	Down	0	1	1
A_32_P181166	C1orf162	0.135612	0.913223	Down	0	0	0
A_23_P99027	PTPN11	0.849711	0.09874	Down	0	0	1
A_23_P63584	AHCTF1	0.00314975	0.00329049	Down	1	1	1
A_24_P245767	SUMO3	0.235663	0.610285	Up	0	0	1
A_23_P501134	LIG3	0.0216869	0.0806643	Down	1	0	1
A_23_P396804	ZNF160	0.161538	0.17534	Down	0	0	1
A_24_P295620	AASDHPPT	0.908263	0.0802578	Down	0	0	1
A_24_P191884	PHAX	0.000261706	0.715289	Down	1	0	1
A_23_P124122	PXMP2	0.131349	0.075514	Up	0	0	1
A_24_P141786	ATP2A2	0.151575	0.47398	Down	0	0	1
A_23_P152807	RSAD1	0.840305	1.25e-05	Up	0	1	1
A_24_P32520	RNF214	0.854504	0.304364	Down	0	0	1
A_23_P145068	MTO1	0.739127	0.00417193	Down	0	1	1
A_32_P196483	RPS3A	0.996903	0.000594904	Down	0	1	1
A_23_P398294	HIP1R	0.708879	0.00952675	Up	0	1	1
A_24_P350622	KIR2DL4	0.153302	0.13043	Down	0	0	0
A_24_P66528	SRP9	0.937238	0.0255569	Down	0	1	1
A_23_P65262	N4BP2L2	0.880585	0.0563919	Down	0	0	1
A_32_P95823	UBXN4	0.500269	0.842047	Down	0	0	1
A_23_P308763	FARP1	0.6489	0.656274	Down	0	0	1
A_23_P150718	RHOG	0.787072	0.0316779	Up	0	1	1
A_23_P366328	VPS37A	0.980582	0.00716085	Down	0	1	1
A_32_P165116	WDR92	0.218001	0.00573917	Down	0	1	1
A_23_P254472	C6orf211	0.790311	0.00346481	Down	0	1	0
A_23_P101950	MDH1	0.833643	0.0168104	Up	0	1	1
A_24_P56887	CRLF3	0.98826	0.802925	Down	0	0	1
A_23_P358394	FAM65B	0.00949007	0.00222082	Down	1	1	0
A_24_P316475	TTF2	0.00589695	0.72583	Down	1	0	1
A_23_P204828	NR2C1	0.0635332	0.711928	Down	0	0	1
A_23_P55639	RPRD1A	0.981232	0.193862	Up	0	0	1
A_23_P132019	ITCH	0.332123	0.0164056	Down	0	1	1
A_23_P142173	DHX34	0.845245	0.000646919	Down	0	1	1
A_23_P53541	CHD4	0.0364985	0.0882931	Down	1	0	1
A_23_P86002	TMED5	0.792122	0.95607	Down	0	0	1
A_24_P234921	CCR6	0.976287	0.54039	Down	0	0	1
A_23_P421935	ATXN7L3	0.926194	0.920861	Up	0	0	1
A_23_P92948	PRRC1	0.0139736	0.0214698	Down	1	1	1
A_23_P131706	BOLA3	0.223516	0.213763	Up	0	0	1
CPID_574	TIMELESS	0.775147	0.689141	Down	0	0	1
A_24_P290572	RBM25	0.837889	0.39569	Down	0	0	1
A_23_P119907	ANKZF1	0.886386	0.438447	Up	0	0	1
A_23_P343237	ANGEL2	0.892938	0.139526	Down	0	0	1
A_23_P61398	PIM3	0.290472	0.31872	Up	0	0	1
A_23_P250644	CDKN2AIPNL	0.248589	0.160318	Up	0	0	1
A_23_P127140	RAB11FIP2	0.998346	0.896573	Down	0	0	1
A_24_P415208	RECK	0.934658	0.000222393	Up	0	1	1
A_23_P151426	FOXO1	0.234694	0.00669712	Down	0	1	1
A_23_P360245	NUDCD2	0.466031	0.000449065	Up	0	1	1
A_32_P221822	RRP15	0.930434	0.00197919	Down	0	1	1
A_23_P107933	VRK3	0.0316811	0.0111185	Down	1	1	1
A_23_P329835	UTY	0.771396	0.808127	Down	0	0	1
A_23_P215214	LMBR1	0.935977	0.473433	Down	0	0	1
A_23_P32328	LYRM4	0.721262	0.000277418	Up	0	1	1
A_24_P291598	USP4	0.779927	0.00141739	Down	0	1	1
A_24_P224219	EXOC5	6.25e-07	0.516176	Down	1	0	1
A_24_P63019	IL1R2	0.812585	2.04e-07	Down	0	1	0
A_24_P14434	NDUFB7	0.569838	0.403128	Up	0	0	1
A_23_P159424	ACYP2	0.104537	0.50178	Up	0	0	1
A_24_P342086	WWP2	0.00135502	0.0025907	Down	1	1	1
A_23_P56505	ITGA4	0.358212	0.0448369	Down	0	1	1
A_24_P190804	AP1S2	0.808118	0.000764011	Down	0	1	1
A_23_P69491	RHOA	0.456239	0.00391043	Down	0	1	1
A_23_P23175	SNIP1	0.790311	0.0630793	Down	0	0	1
A_24_P338648	ARL1	0.866282	0.144817	Down	0	0	1
A_23_P250042	SELT	0.703357	0.0448575	Up	0	1	1
A_23_P73780	IRAK1	0.5217	0.429111	Up	0	0	0
A_24_P924329	ZNF234	0.660784	0.0529652	Down	0	0	1
A_24_P216968	NUCKS1	0.403707	0.0842248	Down	0	0	1
A_24_P69538	TLR4	0.248998	0.000471657	Down	0	1	0
A_23_P300136	FLJ23865	0.767553	0.0172181	Up	0	1	0
A_32_P98348	ZNF525	0.821608	0.0071585	Down	0	1	1
A_23_P170331	AP3M2	8.7e-07	0.170844	Down	1	0	1
A_23_P79398	IL1R2	0.665618	0.0011548	Up	0	1	0
A_23_P369948	FOXRED2	0.317901	0.500232	Down	0	0	1
A_24_P188325	UCHL5	0.755733	0.0224715	Down	0	1	1
A_23_P114405	MORF4L2	0.573817	0.188936	Up	0	0	1
A_24_P82358	FOXC2	0.920732	0.182149	Down	0	0	1
A_24_P397903	FAM164A	0.786165	0.824867	Up	0	0	0
A_24_P52004	PDS5A	0.868491	0.703966	Down	0	0	1
A_24_P940725	SFRS18	0.794111	0.0258646	Down	0	1	0
A_23_P201342	DVL1	0.283293	0.0867759	Up	0	0	0
A_23_P97296	NECAP2	0.727007	0.00210355	Down	0	1	1
A_32_P544491	RTTN	0.451469	0.591706	Down	0	0	1
A_32_P136269	NSUN7	0.914413	0.00236452	Up	0	1	1
A_23_P86550	EIF3A	0.154202	0.462329	Down	0	0	1
A_24_P721841	KLHL9	0.981232	0.371298	Up	0	0	1
A_23_P311192	SPTLC1	0.910472	0.129034	Down	0	0	1
A_23_P68624	POFUT1	0.0894895	0.749996	Down	0	0	1
A_23_P126623	PGD	0.354829	0.00565089	Down	0	1	1
A_23_P145844	MET	0.733038	0.665564	Down	0	0	1
A_24_P405430	TIA1	0.609306	0.00469684	Up	0	1	1
A_32_P167791	ST13	0.657968	0.865205	Up	0	0	1
A_24_P139094	SH3GL1	0.84386	0.860067	Up	0	0	1
A_24_P76809	PTPRO	0.99073	0.7667	Down	0	0	0
A_24_P332971	RPL7L1	0.22346	0.00026408	Down	0	1	1
A_24_P346431	TNS3	0.6162	0.248546	Down	0	0	1
A_23_P255436	ARSA	0.887927	0.0205051	Up	0	1	1
A_32_P353072	TMEM106B	0.989906	0.00694175	Down	0	1	1
A_23_P62437	TLR7	0.0567665	0.303872	Down	0	0	0
A_23_P111929	OTUD6B	0.272129	0.403972	Down	0	0	1
A_23_P59192	SNRPC	0.891426	0.00342174	Up	0	1	1
A_23_P259594	AKAP7	0.981232	1.88e-05	Down	0	1	1
A_23_P209625	CYP1B1	0.871977	0.000307627	Down	0	1	1
A_32_P194032	LONRF1	0.835338	0.244396	Down	0	0	1
A_24_P51517	FGR	0.327402	0.108655	Down	0	0	0
A_23_P253200	RPL15	0.527058	0.0401058	Down	0	1	1
A_24_P228579	C20orf7	0.96967	0.00585222	Down	0	1	0
A_23_P2129	TMEM126B	0.828281	0.00107694	Down	0	1	1
A_24_P280378	AQR	0.0218686	0.979957	Down	1	0	1
A_23_P50942	RAB3GAP1	0.455744	0.829634	Down	0	0	1
A_23_P39925	DYSF	0.809004	0.000875022	Down	0	1	0
A_24_P2995	PUM2	0.634976	0.4793	Down	0	0	0
A_23_P115313	TOR3A	0.562592	0.00871389	Up	0	1	1
A_23_P118025	DPEP2	0.884608	0.00791981	Up	0	1	1
A_23_P23380	ELOVL1	0.449761	0.253821	Down	0	0	1
A_23_P140301	PSMA3	0.85501	0.00258097	Down	0	1	1
A_32_P761797	NCRNA00116	0.633207	0.620697	Up	0	0	0
A_23_P140591	ABHD2	0.314206	2.43e-06	Down	0	1	1
A_23_P68892	C22orf28	0.248085	0.0029216	Down	0	1	0
A_24_P914830	STAU2	0.31785	0.0098914	Up	0	1	1
A_23_P418477	AKAP11	0.850177	0.100764	Down	0	0	1
A_23_P398040	YTHDF3	0.634039	0.0174482	Down	0	1	1
A_23_P13442	MICAL2	0.961138	0.00960909	Down	0	1	1
A_23_P25503	FNDC3A	0.500469	0.55932	Down	0	0	0
A_23_P218988	SLC30A5	0.363095	0.348282	Down	0	0	1
A_24_P40529	TMLHE	0.744123	0.0205051	Up	0	1	1
A_32_P95960	CLEC2D	0.835338	0.562665	Down	0	0	1
A_23_P20225	RRM2B	0.993046	0.218538	Down	0	0	1
A_23_P48628	ZBTB25	0.823332	0.0564969	Down	0	0	1
A_24_P416997	APOL3	0.694865	0.00340012	Down	0	1	0
A_32_P38426	C10orf46	0.287054	0.000444458	Down	0	1	0
A_23_P155462	LRRC2	0.766971	0.71044	Up	0	0	0
A_24_P371670	HNRNPA0	0.000359948	0.0486253	Down	1	1	1
A_23_P110725	PRKAA1	0.754885	0.819303	Up	0	0	1
A_24_P928639	SOLH	0.279525	0.71184	Up	0	0	0
A_23_P134910	GGH	0.849405	0.368857	Up	0	0	1
A_23_P52147	TBCE	0.797941	0.00280399	Up	0	1	1
A_23_P201445	PPPDE1	0.950249	0.00107018	Down	0	1	0
A_23_P165180	RFXANK	0.76399	0.0482667	Up	0	1	1
A_24_P28619	ANGEL2	0.988355	0.00258097	Down	0	1	1
A_32_P56874	LPP	0.791887	0.0169216	Down	0	1	1
A_23_P30377	DDX46	0.745492	0.354045	Down	0	0	1
A_23_P205830	BTBD1	0.759955	0.00573386	Down	0	1	1
A_23_P32913	ARMC10	0.783969	0.0375275	Down	0	1	1
A_24_P945000	SKA2	0.939569	0.494753	Up	0	0	1
A_23_P100478	MYST1	0.265636	0.088189	Down	0	0	0
A_23_P202199	SLK	0.814422	0.000368507	Down	0	1	1
A_23_P106998	MRPS23	0.607249	0.0125893	Up	0	1	1
A_24_P202581	ARHGEF1	0.730403	0.874242	Down	0	0	1
A_23_P206945	ACOX1	0.997189	2.9e-06	Up	0	1	1
A_23_P33856	STAG2	0.419705	0.0630203	Down	0	0	1
A_32_P7316	BDNF	0.702216	0.675937	Down	0	0	1
A_23_P69431	RPL4	0.716573	0.00110074	Down	0	1	1
A_24_P647146	HDAC7	0.0692388	0.824062	Up	0	0	1
A_32_P92295	RPL13A	0.428637	0.00152522	Down	0	1	1
A_23_P203351	MS4A7	0.0478833	4.78e-06	Down	1	1	1
A_23_P35194	EIF1AX	0.853298	0.000626906	Down	0	1	1
A_23_P37076	BAG5	0.0769529	0.486761	Down	0	0	1
A_23_P28334	IL18RAP	0.590869	0.143586	Up	0	0	0
A_23_P132644	NCEH1	0.989899	0.00734322	Down	0	1	1
A_24_P244096	DNAJB12	0.447845	0.00143536	Up	0	1	1
A_24_P775249	LOC400657	0.696952	0.0390201	Down	0	1	0
A_23_P160869	LRIG2	0.741742	0.119881	Up	0	0	1
A_24_P136453	TNS1	0.691353	0.0621845	Up	0	0	0
A_32_P107002	RUNDC2A	0.0259231	0.0188972	Down	1	1	0
A_24_P368544	SLC25A26	0.932678	0.122363	Down	0	0	0
A_32_P108474	ABCE1	0.596033	0.00445827	Down	0	1	1
A_23_P256821	CR1	0.376981	3.83e-06	Up	0	1	0
A_23_P99632	RNF31	0.64765	0.619925	Down	0	0	1
A_24_P134195	MYADM	0.923871	0.00130565	Up	0	1	1
A_23_P55149	AP2B1	0.462407	0.0187988	Down	0	1	1
A_32_P229065	TIPRL	0.239379	0.162768	Down	0	0	1
A_24_P914590	C20orf43	0.0663738	0.0518794	Down	0	0	0
A_23_P115792	PLEKHA1	0.422296	0.0163243	Down	0	1	1
A_23_P86838	SLC36A4	0.657968	0.00393452	Up	0	1	1
A_23_P79199	DBI	0.897463	0.00351214	Down	0	1	1
A_23_P102242	MAR7	0.631844	0.0602326	Down	0	0	0
A_23_P142590	ILKAP	0.542623	0.278105	Down	0	0	1
A_23_P79231	CREB1	0.791887	0.0332428	Up	0	1	1
A_24_P213724	KLHL20	5.15e-05	0.692377	Down	1	0	1
A_32_P219657	RPSA	0.779087	0.012645	Down	0	1	1
A_24_P332862	ZNF493	0.99336	0.710703	Down	0	0	1
A_23_P327643	SMC4	0.784967	0.269478	Down	0	0	1
A_32_P55860	SKA2	0.904992	0.0248836	Down	0	1	1
A_24_P323265	ANKHD1	0.825569	0.0850617	Down	0	0	1
A_23_P205997	APH1B	0.940444	0.446432	Up	0	0	1
A_24_P387179	RPS6KB1	0.942838	0.0196535	Down	0	1	1
A_23_P361584	TMEM154	0.956073	0.338479	Down	0	0	0
A_24_P920521	COMMD6	0.975294	0.000498463	Down	0	1	1
A_32_P12820	YWHAZ	0.825457	0.0461844	Down	0	1	1
A_23_P53856	N4BP2L2	0.99535	0.129895	Down	0	0	1
A_23_P333063	SMARCE1	0.000238518	0.585552	Down	1	0	1
A_24_P206344	ZNF746	0.989638	0.00223997	Down	0	1	1
A_23_P110122	CCNG2	0.923871	0.232876	Down	0	0	1
A_24_P83944	ZNF586	0.249036	0.000324484	Down	0	1	1
A_32_P148796	UBXN2B	0.692925	0.019379	Up	0	1	1
A_32_P33723	BTG3	0.913109	0.378862	Down	0	0	1
A_32_P175580	RPS15A	0.450348	0.00599749	Up	0	1	1
A_23_P435610	KIAA0090	0.233408	0.344385	Down	0	0	0
A_24_P16892	TAF2	5.32e-07	0.940167	Down	1	0	1
A_23_P341471	UBE2N	0.3016	0.000424674	Up	0	1	1
A_24_P376483	HLA-A	0.170884	0.0253323	Down	0	1	0
A_24_P299489	NFYC	0.084521	0.346665	Down	0	0	1
A_32_P157531	PDCL3	0.521136	0.00233268	Down	0	1	1
A_23_P121939	PTCD2	0.892784	0.162299	Down	0	0	1
A_24_P190894	ARF1	0.772374	0.213911	Up	0	0	1
A_23_P106602	CRISPLD2	0.609306	3.83e-06	Down	0	1	1
A_23_P1782	CD82	0.0375251	0.00464255	Down	1	1	1
A_24_P67375	TPMT	0.967186	0.0087628	Down	0	1	1
A_24_P23258	GRAMD4	0.562592	0.0286261	Up	0	1	0
A_32_P117170	NAPEPLD	0.965185	0.0167477	Down	0	1	1
A_24_P228700	THOC5	0.976287	0.243842	Down	0	0	1
A_24_P202512	RNF138	0.610497	0.333623	Down	0	0	1
A_24_P174367	PPP1R2	0.854979	0.00309756	Down	0	1	1
A_23_P376488	TNF	0.516824	0.0546125	Up	0	0	0
A_23_P104022	TSEN15	0.651926	0.0064077	Up	0	1	1
A_24_P187921	MANEA	0.791887	0.139221	Down	0	0	1
A_24_P257585	SLC30A5	0.913011	0.224833	Down	0	0	1
A_23_P143143	ID2	0.610688	0.0877483	Down	0	0	1
A_23_P144378	ANKRD17	0.0138666	0.0978578	Down	1	0	1
A_23_P137578	FBXO28	0.715656	0.20887	Down	0	0	1
A_23_P77980	SLC4A1	0.810851	0.743829	Up	0	0	0
A_24_P406814	FAM53B	0.910562	0.00323147	Up	0	1	1
A_32_P18440	ARID5B	0.182298	0.14521	Down	0	0	1
A_23_P117190	DNAJC15	0.883157	0.00148173	Down	0	1	0
A_32_P96719	SHCBP1	0.456239	0.71044	Down	0	0	1
A_24_P266048	FAM134B	0.744123	0.277118	Down	0	0	0
A_23_P88435	FOXN3	0.284796	0.268083	Down	0	0	1
A_32_P136402	THOC7	0.714443	0.000418944	Down	0	1	0
A_23_P130815	KIR2DS2	0.756206	0.117163	Down	0	0	0
A_23_P103631	EBNA1BP2	0.810851	0.175643	Up	0	0	1
A_24_P49383	C11orf67	0.0403338	0.0151847	Up	1	1	0
A_23_P250701	WNK1	0.91177	0.11769	Up	0	0	1
A_24_P418619	RPS10	0.826766	0.00232658	Up	0	1	1
A_24_P237117	KCNG1	0.957343	0.119881	Down	0	0	0
A_23_P163143	ACYP1	0.685818	0.000282826	Up	0	1	1
A_23_P411296	CEBPB	0.657968	0.0212001	Up	0	1	1
A_32_P95397	ITGB1	0.832446	0.582805	Down	0	0	1
A_24_P49514	PLEKHM1	0.714168	0.180488	Down	0	0	0
A_24_P919419	NIPAL3	0.524227	0.289001	Down	0	0	1
A_24_P630039	PHIP	0.926454	0.0452944	Down	0	1	1
A_32_P83784	ARAP2	0.976255	0.00176011	Down	0	1	0
A_23_P56437	GTF3C3	0.775566	0.0195266	Down	0	1	1
A_24_P655849	SMAD9	0.997161	0.446432	Down	0	0	0
A_24_P187131	FRYL	0.529913	0.804057	Down	0	0	1
A_23_P14804	TSPAN3	0.947316	0.000916946	Down	0	1	1
A_24_P397515	HMGN4	0.894008	0.377819	Up	0	0	1
A_23_P40503	ZNF295	0.131809	0.654162	Down	0	0	0
A_24_P260371	PARM1	0.91454	0.454562	Down	0	0	0
A_23_P137865	MTX1	0.929491	0.238694	Up	0	0	1
A_24_P521994	KLHL24	0.733854	0.992315	Down	0	0	1
A_23_P302568	SLC30A3	0.969302	0.546857	Down	0	0	0
A_23_P205929	DPP8	0.82755	0.107641	Down	0	0	1
A_23_P157600	DDHD2	0.728635	0.159554	Down	0	0	1
A_23_P104996	BEST1	0.536359	0.000463716	Down	0	1	1
A_24_P919899	ATPAF1	0.0816089	0.652246	Down	0	0	1
A_23_P392076	STRN3	0.989749	0.947213	Down	0	0	1
A_24_P821168	EEF1D	0.763931	0.0599861	Up	0	0	1
A_23_P83028	RECK	0.894377	0.00652117	Up	0	1	1
A_24_P396650	RPS6KA1	0.507099	0.0654612	Down	0	0	1
A_23_P115824	HNRNPH3	0.703598	0.3579	Down	0	0	1
A_23_P212639	TRA2B	0.971152	0.0266856	Down	0	1	1
A_32_P205550	RPL26L1	0.884123	0.00991148	Down	0	1	1
A_23_P112162	DGAT1	0.989749	0.502638	Up	0	0	1
A_23_P11995	PRDX1	0.926454	1.5e-05	Up	0	1	1
A_23_P65157	COX17	0.715656	0.00775064	Up	0	1	1
A_24_P109071	KIF27	0.539052	0.0787954	Up	0	0	1
A_23_P53736	FBXO21	0.946231	9.63e-05	Up	0	1	1
A_32_P155811	CD2AP	0.892938	0.0125056	Down	0	1	1
A_23_P100788	STAT5B	0.485572	0.00292736	Down	0	1	1
A_24_P15658	LYSMD3	0.788168	0.860067	Down	0	0	1
A_24_P412617	UBE2Q2	0.989638	0.486192	Up	0	0	1
A_24_P124325	IKZF5	0.946231	0.0280231	Down	0	1	1
A_32_P232865	BCR	0.28377	0.0147983	Down	0	1	1
A_24_P366749	ATP8B2	0.000117928	0.245185	Down	1	0	1
A_24_P217628	PRDM9	0.989638	0.468061	Up	0	0	1
A_23_P108592	PPP3R1	0.735007	0.130266	Down	0	0	1
A_23_P391583	PDXDC1	0.61687	0.454054	Down	0	0	1
A_23_P361614	HLA-G	0.776958	0.428664	Up	0	0	0
A_23_P75255	VPS26A	0.939181	0.0596406	Down	0	0	1
A_23_P26954	VAT1	0.737714	0.153683	Up	0	0	1
A_23_P430758	CDC42SE2	0.810201	0.684218	Up	0	0	1
A_23_P379142	ZNF626	0.693387	0.910204	Up	0	0	1
A_24_P285032	IDS	0.363106	0.0164675	Down	0	1	1
A_24_P340813	SFRS18	0.235663	0.790501	Down	0	0	0
A_23_P16722	DOCK10	0.0991181	0.0102739	Down	0	1	1
A_24_P167012	TNFSF15	0.133798	0.915037	Down	0	0	1
A_23_P347070	PAG1	0.699659	0.132092	Down	0	0	0
A_23_P252145	C1GALT1	0.56537	0.0964883	Down	0	0	1
A_32_P367241	DUSP19	0.655648	0.306084	Down	0	0	1
A_23_P113803	KATNA1	0.518454	0.000797033	Up	0	1	1
A_24_P137372	ATP2C1	0.528797	0.00788712	Down	0	1	1
A_23_P53267	RSRC2	0.547685	3.4e-05	Up	0	1	1
A_23_P395954	SSH2	0.665618	0.000704822	Down	0	1	1
A_32_P34149	HNRNPH1	0.558338	0.827298	Up	0	0	1
A_23_P212706	ATG3	0.374512	0.000542426	Down	0	1	1
A_23_P157316	C7orf34	0.440339	0.00052801	Up	0	1	0
A_23_P82674	GBAS	0.928079	0.000107384	Down	0	1	1
A_24_P305933	TMCC3	0.267837	0.709185	Up	0	0	0
A_23_P163059	C14orf135	0.511509	0.468061	Down	0	0	0
A_24_P886040	DCP2	0.715656	0.033871	Down	0	1	1
A_24_P120352	TBC1D14	0.56537	0.0533749	Down	0	0	1
A_24_P336441	GUK1	0.00366558	0.075514	Up	1	0	1
A_23_P33420	TLR10	0.0566181	0.516408	Down	0	0	0
A_23_P354827	ZNF550	0.959191	0.00352676	Down	0	1	1
A_24_P309360	TM9SF3	0.884461	0.0414933	Down	0	1	0
A_24_P681301	UBC	0.437955	0.06748	Up	0	0	1
A_32_P112894	FAM76A	0.976287	0.508459	Down	0	0	1
A_24_P912889	SELS	0.792122	0.120342	Up	0	0	0
A_23_P219117	EPB49	0.87113	0.222712	Up	0	0	0
A_23_P128930	PSMC6	0.805423	5.56e-05	Down	0	1	1
A_32_P106646	FAM36A	0.551854	0.10239	Down	0	0	0
A_23_P153197	TGIF1	0.662704	0.222547	Up	0	0	1
A_23_P63681	IDE	0.90573	0.277619	Up	0	0	1
A_23_P79416	FBXO11	0.946231	0.222712	Down	0	0	1
A_23_P213385	BASP1	0.571197	0.000239771	Down	0	1	1
A_23_P105619	TMEM116	0.952018	0.00121842	Up	0	1	1
A_23_P359043	AKAP2	0.0573201	0.833687	Down	0	0	1
A_23_P1403	C10orf137	0.253691	0.492601	Down	0	0	0
A_23_P432034	CCDC117	0.948484	0.0992083	Up	0	0	1
A_32_P129950	NHLRC3	0.880011	0.000471225	Down	0	1	1
A_23_P152919	NUP88	0.945988	1.9e-07	Down	0	1	1
A_23_P75903	TOLLIP	0.973915	0.182829	Up	0	0	1
A_24_P286412	CRCP	4.23e-05	0.00218952	Down	1	1	1
A_23_P1759	AMICA1	0.00105893	2.53e-08	Down	1	1	0
A_23_P3212	DTWD1	0.660421	0.000414192	Up	0	1	1
A_23_P109470	THOC5	0.450076	0.0604988	Down	0	0	1
A_23_P9458	POLR1E	0.264313	0.0175336	Down	0	1	1
A_23_P132784	FXR1	0.874931	0.000376988	Down	0	1	1
A_23_P74688	ATAD3B	0.794111	0.552762	Up	0	0	1
A_23_P50081	IMPA2	0.874026	0.0594317	Down	0	0	1
A_23_P29566	ARPC4	0.812585	0.661074	Up	0	0	1
A_24_P412512	NIN	0.00800385	0.000202575	Down	1	1	0
A_23_P137143	DKC1	0.603741	2.88e-05	Down	0	1	1
A_24_P915492	INPP4B	0.613469	0.773469	Down	0	0	0
A_23_P165136	LRRC25	0.632282	0.0032277	Down	0	1	1
A_32_P65943	EEF1D	0.676095	0.0116749	Down	0	1	1
A_23_P104509	FAM53B	0.779969	0.334849	Down	0	0	1
A_23_P67618	ZNF792	0.143334	0.0930447	Down	0	0	1
A_23_P65877	SLC12A6	0.818954	1.56e-05	Down	0	1	1
A_23_P24763	RPS13	0.678064	0.0068485	Up	0	1	1
A_24_P418637	MACF1	0.916452	0.537958	Up	0	0	0
A_24_P271542	C22orf32	0.990135	5.9e-06	Up	0	1	0
A_23_P259166	TCEAL4	0.627069	3.5e-06	Up	0	1	1
A_23_P58180	CYP4V2	0.928079	0.0771023	Up	0	0	1
A_23_P84448	TUBA4A	0.568063	0.00602325	Up	0	1	1
A_32_P61339	PHIP	0.837889	0.846376	Up	0	0	1
A_24_P83118	DUSP18	0.480063	0.00175561	Up	0	1	1
A_23_P163079	GCH1	0.22346	0.163838	Down	0	0	1
A_23_P140698	DNAJC17	0.799704	0.0577174	Up	0	0	1
A_23_P250380	MAN2B2	0.0556782	0.163837	Down	0	0	1
A_23_P99762	RBM25	0.0401106	0.667339	Down	1	0	1
A_23_P374812	ATM	0.884206	0.573854	Down	0	0	1
A_23_P216312	CNOT7	0.436687	0.769338	Down	0	0	1
A_23_P145153	PDCD2	0.882996	0.0117039	Up	0	1	1
A_23_P316960	GRINA	0.90091	0.25822	Up	0	0	1
A_23_P41437	UFSP2	0.868759	0.00409977	Up	0	1	1
A_23_P67583	MAP1S	0.488393	0.100137	Down	0	0	1
A_23_P205584	JKAMP	0.552039	0.445961	Down	0	0	1
A_23_P30307	MED7	0.799521	0.000192943	Down	0	1	1
A_23_P25566	GPR183	0.85738	0.000401015	Down	0	1	0
A_23_P202029	ERLIN1	0.792735	0.655682	Down	0	0	1
A_32_P93852	BOD1	0.985826	0.00187337	Down	0	1	1
A_23_P65110	RACGAP1	0.911103	0.0594644	Up	0	0	1
[truncated: 4,194 more rows]
