# Supplementary material for: Mistimed sleep and waking activity in humans disrupts glucocorticoid signalling transcripts and SP1, but not plasma cortisol rhythms
Source: Front Physiol. 2022 Aug 17;13:946444. doi: 10.3389/fphys.2022.946444 (PMC9428761; doi:10.3389/fphys.2022.946444)
Supplement: Supplementary file 4 [file Table1.XLSX]

## Sheet: ArcherSupplementalDataFile1_rev
Probe_ID	Gene_Symbols	Sleep_condition_BHp	Sleep_condition_x_cortisolbin_interaction_BHp	Sleep_out.of.phase_up.down_regulation	Significant_MainEffect	Significant_Interaction	SP1_site
A_23_P30024	NFKB1	0.068512	0.423151	Down	0	0	1
A_23_P202156	NFKB2	0.866568	0.378902	Up	0	0	1
A_23_P104689	RELA	0.897843	0.87247	Down	0	0	1
A_24_P937256	RELA	0.292304	0.179536	Up	0	0	1
A_23_P106002	NFKBIA	0.676076	0.951016	Down	0	0	1
A_23_P114656	HDAC1	0.52907	0.0744669	Down	0	0	1
A_24_P212851	SMARCA4	0.0184394	0.351697	Down	1	0	1
A_23_P39040	SMARCA4	0.0432905	0.00420395	Down	1	1	1
A_23_P113382	GRIP1	0.520553	0.87247	Down	0	0	0
A_23_P207596	NF1	0.753586	0.0251891	Down	0	1	1
A_24_P917026	NF1	0.866568	0.968781	Down	0	0	1
A_24_P1919	NF1	0.750363	0.559143	Down	0	0	1
A_23_P424002	POU2F1	0.907273	0.0178713	Down	0	1	1
A_24_P927182	POU2F1	0.32052	0.657477	Down	0	0	1
A_32_P142077	POU2F1	0.472987	0.87247	Down	0	0	1
A_24_P296792	POU2F2	0.126841	0.0553615	Down	0	0	1
A_23_P79231	CREB1	0.710755	0.0399417	Up	0	1	1
A_24_P932208	CREB1	0.207062	0.0214661	Down	0	1	1
A_24_P105721	CREB1	0.0184394	0.0251891	Down	1	1	1
A_24_P173088	STAT5A	0.00216266	0.486852	Down	1	0	1
A_23_P207367	STAT5A	0.0271021	0.126464	Down	1	0	1
A_23_P100788	STAT5B	0.386205	0.0036789	Down	0	1	1
A_24_P342178	STAT5B	0.174912	0.023769	Down	0	1	1
A_24_P216165	CEBPA	0.578412	0.294083	Up	0	0	1
A_23_P375494	CEBPA	0.90095	0.378902	Up	0	0	1
A_24_P224727	CEBPA	0.968304	0.33184	Up	0	0	1
A_23_P143242	CEBPB	0.514184	0.0022582	Down	0	1	1
A_23_P411296	CEBPB	0.539152	0.0251891	Up	0	1	1
A_24_P89457	CDKN1A	0.319509	0.87247	Down	0	0	1
A_23_P59210	CDKN1A	0.968304	0.0780133	Up	0	0	1
A_23_P359091	SMAD3	0.514184	0.000829938	Up	0	1	1
A_23_P48936	SMAD3	0.866568	0.0448008	Up	0	1	1
A_23_P27346	SMAD4	0.256715	0.87247	Down	0	0	1
A_23_P367676	SIN3A	0.414575	0.76146	Down	0	0	1
A_24_P304760	SIN3A	0.539152	0.338447	Up	0	0	1
A_23_P120933	ATF4	0.219706	0.126464	Up	0	0	1
A_23_P120941	ATF4	0.907273	0.086293	Up	0	0	1
A_23_P423389	CREB3	0.53487	0.318462	Down	0	0	1
A_23_P157117	CREB5	0.968304	3.78e-08	Up	0	1	0
A_24_P532232	CREB5	0.863092	0.0157703	Down	0	1	0
A_32_P133518	SUMO1	0.47612	0.87247	Down	0	0	1
A_24_P319354	SUMO1	0.045262	0.176189	Up	1	0	1
A_23_P152107	UBE2I	0.607982	0.0512683	Up	0	0	1
A_23_P63209	HSD11B1	0.90095	0.338447	Down	0	0	0
A_23_P14986	HSD11B2	0.815902	0.181711	Down	0	0	1
A_24_P237265	MAPK1	0.0684759	0.000143413	Down	0	1	1
A_23_P257895	MAPK1	0.619043	0.00714088	Down	0	1	1
A_23_P356152	MAPK8	0.539152	0.551755	Down	0	0	0
A_23_P202540	MAPK8	0.292304	0.338447	Up	0	0	0
A_23_P502274	MAPK11	2.72e-05	0.40574	Up	1	0	1
A_23_P201538	JUN	0.590025	0.0553615	Down	0	0	1
A_23_P106194	FOS	0.590025	0.00420395	Down	0	1	1
A_24_P214754	NR3C1	0.968898	0.0282158	Down	0	1	1
A_23_P214059	NR3C1	0.980338	0.0189681	Up	0	1	1
A_23_P162874	HSP90AA1	7.63e-05	0.00420395	Down	1	1	1
A_24_P145377	HSP90AA1	0.866568	0.00474227	Down	0	1	1
A_32_P199252	HSP90AA1	0.00114934	0.0439029	Down	1	1	1
A_23_P162866	HSP90AA1	0.150295	0.00247561	Down	0	1	1
A_23_P111132	HSPA1A	0.110416	4.87e-05	Down	0	1	0
A_24_P123616	HSPA1A	0.0184394	0.00267183	Down	1	1	0
A_24_P682285	HSPA1A	0.0184394	0.0024253	Down	1	1	0
A_24_P7887	EP300	2.18e-05	1.48e-05	Down	1	1	1
A_23_P40693	EP300	0.36937	0.056079	Down	0	0	1
A_24_P342279	CREBBP	0.0074625	4.61e-07	Down	1	1	1
A_23_P163850	CREBBP	0.967656	0.0018018	Up	0	1	1
A_24_P322025	CREBBP	0.90095	0.000829938	Down	0	1	1
A_24_P204214	NCOR1	1.87e-05	0.00714088	Down	1	1	1
A_24_P911017	NCOR1	0.53487	0.76146	Down	0	0	1
A_23_P141651	NCOR1	0.00125171	0.00420395	Down	1	1	1
A_24_P237661	NCOR1	0.866568	0.0553615	Down	0	0	1
A_32_P30813	PTGES3	0.907273	0.000712524	Up	0	1	1
A_24_P263623	PTGES3	0.479881	0.0780133	Down	0	0	1
A_24_P343869	PTGES3	0.0855074	0.681154	Down	0	0	1
A_32_P114896	PTGES3	0.292304	0.798533	Up	0	0	1
A_23_P128372	FKBP4	0.908781	0.195454	Down	0	0	1
A_32_P159651	KAT2B	0.527796	0.0448008	Up	0	1	1
A_23_P41128	KAT2B	0.139651	0.201724	Down	0	0	1
A_24_P926367	THRAP3	0.723139	0.0036789	Down	0	1	1
A_23_P160367	THRAP3	0.849449	0.0420781	Down	0	1	1
A_24_P256863	THRAP3	0.0345602	0.0830048	Down	1	0	1
A_23_P19313	TBP	0.0855074	0.761188	Up	0	0	1
A_23_P365738	ARC	0.908781	0.377483	Down	0	0	0
A_24_P201936	GTF2A1	0.95905	0.87247	Down	0	0	1
A_23_P65609	GTF2A1	0.0180934	0.349274	Down	1	0	1
A_23_P65615	GTF2A1	7.63e-05	0.0851417	Down	1	0	1
A_23_P211748	GTF2E1	0.956297	0.00420395	Down	0	1	1
A_23_P36183	GTF2H1	0.956297	0.100788	Up	0	0	1
A_23_P16143	GTF2F1	0.0427078	0.288361	Down	1	0	1
A_24_P99679	POLR2A	0.404515	0.173608	Down	0	0	1
A_24_P308128	POLR2A	0.152482	0.346573	Down	0	0	1
A_23_P144311	POLR2B	0.207062	0.179536	Down	0	0	1
A_23_P3527	POLR2C	0.907273	0.254014	Up	0	0	1
A_32_P219753	POLR2D	0.656173	0.823496	Down	0	0	1
A_23_P209778	POLR2D	0.971423	0.362249	Up	0	0	1
A_23_P165280	POLR2E	0.656173	0.197931	Up	0	0	1
A_23_P80321	POLR2F	0.24867	0.338447	Up	0	0	1
A_24_P417007	POLR2F	0.51179	0.164268	Up	0	0	1
A_23_P36147	POLR2G	0.503953	1.48e-05	Up	0	1	1
A_23_P29803	POLR2H	0.00132029	0.00186922	Up	1	1	1
A_23_P56256	POLR2I	0.306797	0.00155788	Up	0	1	1
A_24_P292020	POLR2J	0.866568	0.346241	Up	0	0	1
A_23_P42649	POLR2J	0.514184	0.105384	Down	0	0	1
A_23_P157452	POLR2K	0.908781	0.000900049	Down	0	1	1
A_23_P157449	POLR2K	0.956309	0.00103339	Down	0	1	1
A_23_P33022	POLR2L	0.53487	0.00565909	Up	0	1	1
A_24_P330009	POLR2L	0.319509	0.00185798	Up	0	1	1
A_23_P33015	POLR2L	0.866568	0.898712	Down	0	0	1
A_23_P94501	ANXA1	0.53487	0.000712524	Down	0	1	1
A_23_P41765	IRF1	0.212894	0.00545655	Down	0	1	1
A_23_P39602	NCOA1	0.0684759	0.00652163	Down	0	1	0
A_23_P428999	NCOA2	0.207062	0.182107	Down	0	0	1
A_23_P313568	NCOA3	0.0855074	0.12491	Down	0	0	1
A_23_P313560	NCOA3	0.58216	0.0715072	Down	0	0	1
A_23_P120442	NCOA3	0.0319474	0.0420781	Down	1	1	1
A_23_P211007	NRIP1	0.750363	0.00289525	Down	0	1	1
A_23_P146654	BAG1	0.479881	0.023769	Up	0	1	1
A_24_P26342	BDP1	0.00973229	0.304999	Down	1	0	1
A_23_P7483	BDP1	0.221612	0.499421	Down	0	0	1
A_24_P42316	BDP1	0.000280744	0.87247	Down	1	0	1
A_24_P247910	BDP1	0.907273	0.344631	Up	0	0	1
A_24_P940776	BDP1	0.479881	0.00249018	Down	0	1	1
A_23_P110712	DUSP1	0.908781	0.00267183	Up	0	1	1
A_24_P158089	SERPINE1	0.908781	0.385333	Down	0	0	1
A_23_P119222	RETN	0.198393	0.349274	Up	0	0	0
A_23_P411162	PER2	0.0184394	0.87247	Down	1	0	1
A_23_P209320	PER2	0.587157	0.759049	Up	0	0	1
A_23_P26810	TP53	0.863092	0.829791	Up	0	0	1
A_24_P889720	UBC	0.342532	0.193799	Down	0	0	1
A_23_P329740	UBC	0.539152	0.974195	Up	0	0	1
A_24_P266880	UBC	0.785826	0.378902	Down	0	0	1
A_24_P681301	UBC	0.322438	0.0744669	Up	0	0	1
A_23_P309739	ESR1	0.285531	0.349274	Down	0	0	1
A_24_P383478	ESR1	0.968304	0.027907	Down	0	1	1
A_24_P325215	ESR1	0.56367	0.362249	Up	0	0	1
A_23_P129169	CYP11A1	0.539152	0.0420781	Up	0	1	0
A_24_P52597	CYP17A1	0.90095	0.0214661	Down	0	1	1
A_23_P257478	CYP21A2	0.866568	0.041765	Down	0	1	0
A_23_P168928	CYP11B1	0.56367	0.114669	Up	0	0	0
A_24_P329424	CYP11B1	0.475059	0.173608	Up	0	0	0
A_23_P51580	HSD3B2	0.908781	0.229632	Down	0	0	0
A_23_P117363	SERPINA6	0.866568	0.229632	Down	0	0	1
A_23_P37910	MAPK3	0.866568	0.378902	Up	0	0	1
A_23_P85460	CDKN2C	0.676076	0.378902	Up	0	0	1
A_23_P94118	GTF2E2	0.257786	0.0471014	Down	0	1	1
